# Supplementary material
Source: PubMed Central journal article supplement (PMC3426636)
Supplement: NIHMS382304-supplement-1_si_001.pdf [file NIHMS382304-supplement-1_si_001.pdf]

# Acetylphosphonate as a Surrogate of Acetate or Acetamide in Organocatalyzed Enantioselective Aldol Reactions

Jie Guang, Qunsheng Guo, and John Cong-Gui Zhao\*

Department of Chemistry, University of Texas at San Antonio

## Supporting Information

### Table of Contents

|                                        |      |
|----------------------------------------|------|
| General Information .....              | S-1  |
| Experimental Procedures .....          | S-1  |
| Proposed Transition State Models ..... | S-3  |
| Proposed Reaction Mechanism.....       | S-5  |
| Compound Characterization Data .....   | S-6  |
| Additional References.....             | S-13 |
| ORTEP Drawing of Compound 3o .....     | S-14 |
| ORTEP Drawing of Compound 3r.....      | S-15 |
| Copy of NMR Spectra .....              | S-16 |
| Copy of HPLC Chromatograms.....        | S-38 |

## General information

Unless otherwise noted, all reactions were carried out under nitrogen atmosphere. TLC was performed with silica gel GF<sub>254</sub> precoated on plastic plates and spots were visualized with UV. <sup>1</sup>H and <sup>13</sup>C NMR spectra were recorded on a 300 MHz spectrometer (75 MHz for <sup>13</sup>C). The following abbreviations were used to designate chemical shift multiplicities: s = singlet, d = doublet, t = triplet, q = quartet, m = multiplet, br = broad. All first-order splitting patterns were assigned on the basis of the appearance of the multiplet. Splitting patterns that could not be easily interpreted are designated as multiplet (m) or broad (br). Melting points were recorded in open capillaries and uncorrected. Flash column chromatography was performed on silica gel. HPLC analysis was performed on an HPLC instrument equipped with a UV-Vis detector.

Solvents used in this study were freshly distilled from an appropriate drying agent before use. Dialkyl alkanoylphosphonates were prepared according to literature.<sup>24</sup> *N*-Methyl,<sup>25</sup> *N*-benzyl,<sup>26</sup> and *N*-trityl<sup>27</sup> protected isatin derivatives were prepared as described previously. Catalysts were synthesized by following the published procedures.<sup>18</sup>

## Experimental Procedures

**General Experimental Procedure for the Aldol Reaction of Isatins and Phenylglyoxal Hydrate:** A solution of catalyst **4c** or **4j** (2.3 mg, 5.0 μmol, 5.0 mol %) and *N*-tritylisatin **2a** (38.9 mg, 0.10 mmol) in THF (2.0 ml) were stirred at -15 °C for 15 min. Then diisopropyl acetylphosphonate **1c** (104.1 mg, 0.50 mmol) was added in one portion to the above mixture. The reaction mixture was further stirred at the above temperature for 6 h (monitored by TLC). Upon the completion of the reaction, the reaction mixture was allowed to warm to room temperature and then methanol (1.0 mL) and DBU (15.2 mg, 0.10 mmol) were added sequentially. After stirring for an additional 15 min, the volatile components were removed under reduced pressure. The residue was purified by column chromatography on silica gel (EtOAc/hexane=1:2) to afford the desired aldol product.

### Experimental Procedure for the Synthesis of the Acetamide Aldol Product **7** (Scheme 1)

A solution of catalyst **4j** (2.3 mg, 5.0 μmol, 5.0 mol %) and *N*-tritylisatin **2a** (38.9 mg, 0.10 mmol) in THF (2.0 ml) were stirred at -15 °C for 15 min. Then diisopropyl acetylphosphonate **1c** (104.1 mg, 0.50 mmol) was added in one portion to the above mixture. The reaction mixture was further stirred at the above temperature for 6 h (monitored by TLC). Upon the completion of the reaction, the reaction mixture was allowed to warm to room temperature and then MeNH<sub>2</sub> solution in THF (2.0 M, 1.0 mL, 2.0 mmol) was added. After stirring for an additional 15 min, the volatile

components were removed under reduced pressure. The residue was purified by column chromatography on silica gel (EtOAc/hexane=1:2) to afford acetamide aldol product **7** (41.6 mg, 90%, 96% ee).

#### Experimental Procedure for the Synthesis of Pyrrolidine-2,5-dione **9** (Scheme 1)

A solution of catalyst **4j** (4.5 mg, 10.0  $\mu\text{mol}$ , 10.0 mol %) and ethyl 2-oxo-4-phenylbut-3-ynoate **8** (20.2 mg, 0.10 mmol) in THF (1.0 ml) were stirred at  $-15\text{ }^{\circ}\text{C}$  for 15 min. Then diisopropyl acetylphosphonate **1c** (104.1 mg, 0.50 mmol) was added in one portion to the above mixture. The reaction mixture was further stirred at the above temperature for 24 h (monitored by TLC). Then the reaction mixture was allowed to warm to room temperature and  $\text{MeNH}_2$  solution in THF (2.0 M, 1.0 mL, 2.0 mmol) was added. After stirring for an additional 15 min, the volatile components were removed under reduced pressure. The residue was purified by column chromatography on silica gel (EtOAc/hexane=1:2) to afford the desired aldol product **9** (17.4 mg, 76% yield, 76% ee).

#### Removing the Trityl Protecting Group: Converting the Aldol Product **3d** to Compound **3a**<sup>22</sup> (Scheme 2)

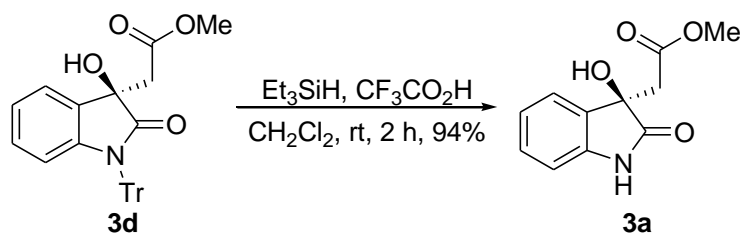

Triethylsilane (64.0  $\mu\text{l}$ , 0.4 mmol) and trifluoroacetic acid (1.0 mL) were added to a solution of **3d** (46.5 mg, 0.10 mmol; 95% ee) in  $\text{CH}_2\text{Cl}_2$  (3.0 mL), and the mixture was stirred for 2 h at room temperature. The reaction was quenched with saturated aq.  $\text{NaHCO}_3$  (6 mL) and extracted with  $\text{CH}_2\text{Cl}_2$  (6 mL  $\times$  3 times). The organic layer was dried over  $\text{MgSO}_4$ , filtered, and concentrated under vacuum. The residue was purified by silica gel preparative TLC (EtOAc/hexane = 1/1) to afford compound **3a** as a white solid (20.5 mg, 94% yield, 96% ee).

#### Synthesis of Half Fragment of Madindoline A and B (compound **11**, Scheme 3)

A solution of (*R*)-methyl 2-(3-hydroxy-2-oxo-1-tritylindolin-3-yl)acetate (**3d**, 139.0 mg, 0.30 mmol, 95% ee) in THF (7.0 ml) was cooled to  $0\text{ }^{\circ}\text{C}$ . To the mixture was added  $\text{LiAlH}_4$ -THF solution (1.0 M, 3.0 mL, 3.0 mmol) while stirring. The reaction was further stirred for 1 h at  $0\text{ }^{\circ}\text{C}$  and then 3 h at room temperature. The reaction mixture was quenched by adding water. The suspension so obtained was filtered through Celite. The Celite layer was washed with  $\text{CH}_2\text{Cl}_2$ . The solvent was evaporated and the crude product obtained was purified by flash column chromatography, eluting with 1:3 EtOAc/hexane, to give compound **10** as pale yellow solid (80.5 mg, 64%).

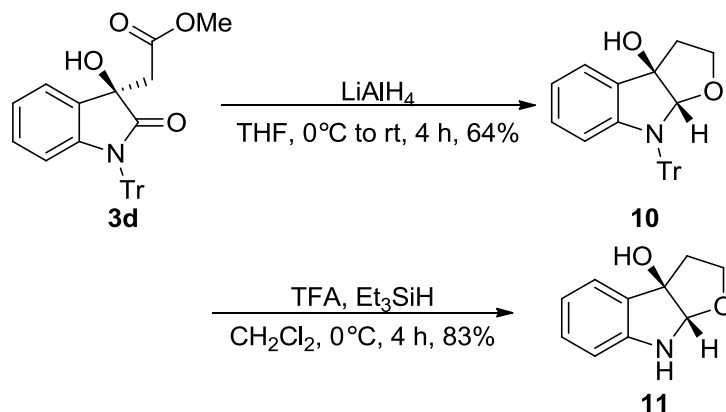

To a solution of **10** (80.5 mg, 0.19 mmol) in  $\text{CH}_2\text{Cl}_2$  (4.0 mL) at  $0^\circ\text{C}$  were added triethylsilane (64.0  $\mu\text{l}$ , 0.40 mmol) and trifluoroacetic acid (3.0  $\mu\text{l}$ , 0.040 mmol) consecutively within 30 min. The reaction mixture was stirred for 3.5 h at  $0^\circ\text{C}$  and then quenched with  $\text{NaHCO}_3$  (42.0 mg, 0.50 mmol). The solvent was removed under reduced pressure and the crude product was purified by flash column chromatography, eluting with 1:2 EtOAc/hexane, to give compound **11** as white solid (30.0 mg, 83%).

### Proposed Transition State Models

The proposed transition state models for catalysts **4b** and **4j** are shown below in Scheme S-1 and Scheme S-2.

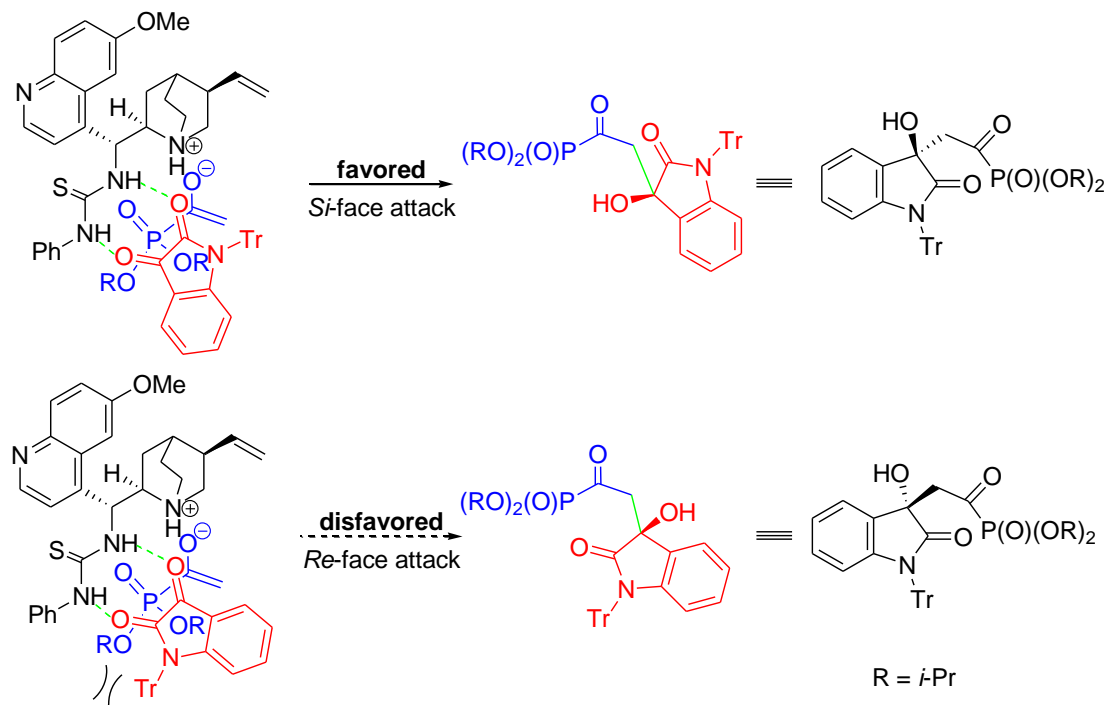

**Scheme S-1: Proposed Transition State Models for Catalyst 4b**

Based on these models, increasing the steric hindrance at 4-position will make the favored TS become less favored. This might be the reason why the stereoselectivity is reversed for 4-substituted isatins (Table 2 of the main text, entries 1-2).

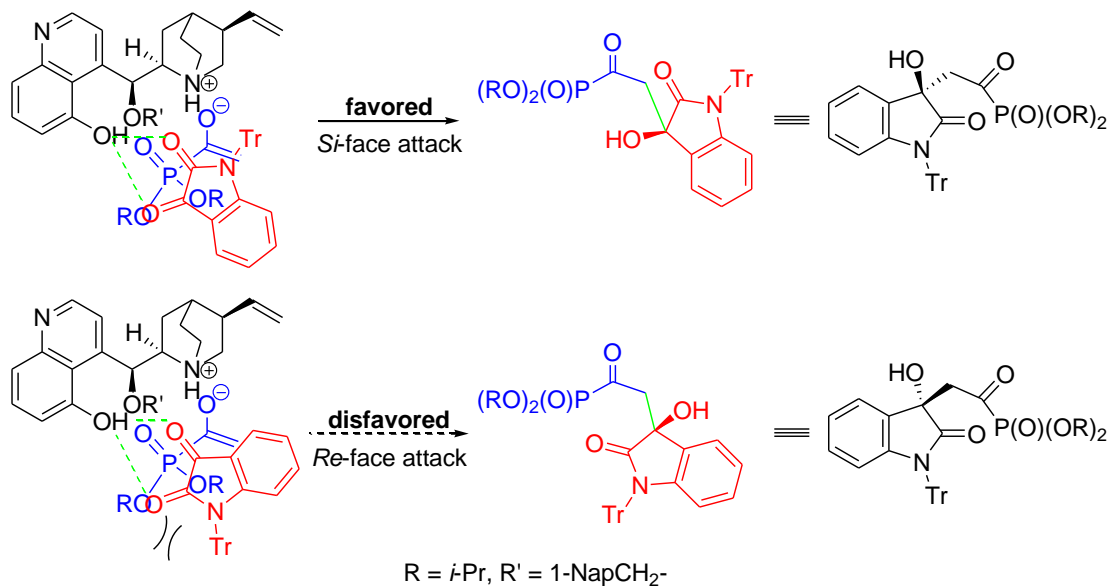

**Scheme S-2: Proposed Transition State Models for Catalyst 4j**

These models can explain the formation of the (*R,S*)-diastereomer **3r** as the major product with this catalyst (Scheme 1, equation A of the main text).

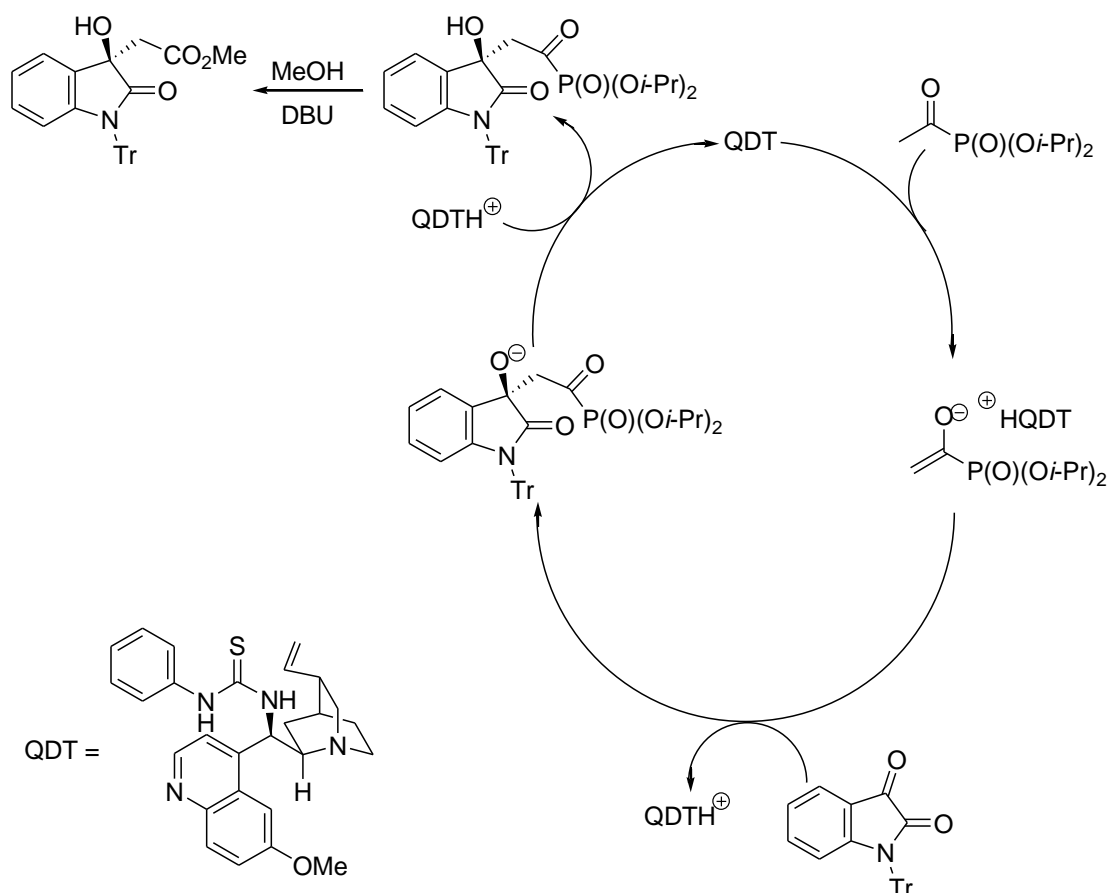

**Scheme S-3: Proposed Mechanism for the Quinidine Thiourea-Catalyzed Aldol Reaction and *in-situ* Conversion of the Aldol Product to an Acetate Derivative.**

## Compound Characterization Data

### (*R*)-Methyl 2-(3-hydroxy-2-oxoindolin-3-yl)acetate (**3a**)<sup>28</sup>

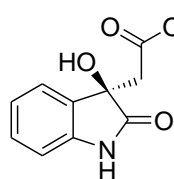

white solid, 94% yield, m.p. 101-103 °C; <sup>1</sup>H (300 MHz, CDCl<sub>3</sub>): δ 2.98 (s, 2H), 3.57 (s, 3H), 3.69 (s, 1H), 4.60 (br, 1H), 6.89 (d, *J* = 7.8 Hz, 1H), 7.07(t, *J* = 7.5 Hz, 1H), 7.27(t, *J* = 9.0 Hz, 1H), 7.38 (d, *J* = 7.8 Hz, 1H), 8.40(s, 1H); <sup>13</sup>C (75 MHz, CDCl<sub>3</sub>): δ 41.1, 52.4, 74.0, 110.7, 123.3, 124.3, 129.7, 130.3, 140.6, 171.0, 178.3;  $\nu_{\max}$ : 1045, 1174, 1205, 1356, 1441, 1468, 1619, 1711, 3379 cm<sup>-1</sup>. [ $\alpha$ ]<sub>D</sub><sup>25</sup> = +120.6 (*c* 0.05, MeOH, 96% ee). Enantiomeric excess of the product was determined by chiral stationary phase HPLC analysis using a ChiralCel OJ-H column (hexanes/*i*-PrOH 90:10 at 1.0 mL/min), major enantiomer: *t*<sub>R</sub> = 31.9 min, minor enantiomer: *t*<sub>R</sub> = 40.7 min.

### (*R*)-Methyl 2-(3-hydroxy-2-oxo-1-tritylindolin-3-yl)acetate (**3d**)

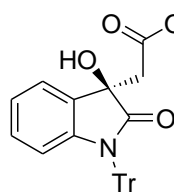

White solid; 90% yield; m.p. 172-174 °C; <sup>1</sup>H (300 MHz, CDCl<sub>3</sub>): δ 2.91 (dd, *J* = 22.2, 15.3 Hz, 2H), 3.57 (s, 3H), 3.68 (s, 1H), 6.22 (d, *J* = 9 Hz, 1H), 6.81-6.89 (m, 2H), 7.11-7.26 (m, 10H), 7.36-7.39 (m, 6H); <sup>13</sup>C (75 MHz, CDCl<sub>3</sub>): δ 42.2, 53.3, 73.4, 74.6, 116.4, 122.7, 123.2, 127.0, 127.7, 128.6, 129.3, 141.8, 143.2, 170.3, 177.7;  $\nu_{\max}$ : 1058, 1119, 1158, 1338, 1448, 1605, 1715, 3367 cm<sup>-1</sup>. [ $\alpha$ ]<sub>D</sub><sup>25</sup> = -33.2 (*c* 0.05, CH<sub>2</sub>Cl<sub>2</sub>, 95% ee). Enantiomeric excess of the product was determined by chiral stationary phase HPLC analysis using ChiralCel OD-H (hexanes/*i*-PrOH 90:10 at 1.0 mL/min), major enantiomer: *t*<sub>R</sub> = 10.7 min, minor enantiomer: *t*<sub>R</sub> = 14.4 min. Anal. calcd. for C<sub>30</sub>H<sub>25</sub>NO<sub>4</sub>: C, 77.74; H, 5.44; N, 3.02. Found: C, 77.52; H, 5.38; N, 3.01.

### (*R*)-Methyl 2-(4-chloro-3-hydroxy-2-oxo-1-tritylindolin-3-yl)acetate (**3e**)

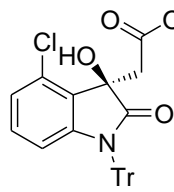

White solid; 87% yield; m.p. 200-202 °C; <sup>1</sup>H (300 MHz, CDCl<sub>3</sub>): δ 3.29-3.46 (m, 3H), 3.65 (s, 3H), 6.26 (d, *J* = 7.5 Hz, 1H), 6.82-6.91 (m, 2H), 7.18-7.29 (m, 9H), 7.45-7.47 (m, 6H); <sup>13</sup>C (75 MHz, CDCl<sub>3</sub>): δ 40.3, 52.2, 74.2, 75.0, 115.0, 123.8, 125.4, 127.1, 127.8, 129.4, 129.5, 130.9, 141.5, 145.6, 169.8, 177.2;  $\nu_{\max}$ : 1149, 1207, 1349, 1446, 1490, 1600, 1725 cm<sup>-1</sup>. [ $\alpha$ ]<sub>D</sub><sup>25</sup> = -45.8 (*c* 0.10, CH<sub>2</sub>Cl<sub>2</sub>, 96% ee). Enantiomeric excess of the product was determined by chiral stationary phase HPLC analysis using ChiralCel OD-H (hexanes/*i*-PrOH 90:10 at 1.0 mL/min), major enantiomer: *t*<sub>R</sub> = 9.2 min, minor enantiomer: *t*<sub>R</sub> = 11.1 min. Anal. calcd. for C<sub>30</sub>H<sub>24</sub>ClNO<sub>4</sub>: C, 72.36; H, 4.86; N, 2.81. Found: C, 71.94; H, 4.95; N, 2.79.

### (*R*)-Methyl 2-(4-bromo-3-hydroxy-2-oxo-1-tritylindolin-3-yl)acetate (**3f**)

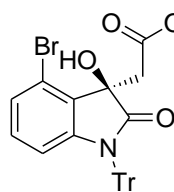

White solid; 92% yield; m.p. 147-149 °C; <sup>1</sup>H (300 MHz, CDCl<sub>3</sub>): δ 3.32 (d, *J* = 15.0 Hz, 1H), 3.49 (d, *J* = 7.5 Hz, 1H), 3.65 (s, 3H), 6.31 (d, *J* = 8.1 Hz, 1H), 6.78 (t, *J* = 8.1 Hz, 1H), 7.06 (d, *J* = 8.1 Hz, 1H), 7.18-7.29 (m, 10H), 7.44-7.47 (m, 6H); <sup>13</sup>C (75 MHz, CDCl<sub>3</sub>): δ 40.2, 52.2, 74.7, 75.0, 115.0, 118.7, 126.9, 127.1, 127.8,

129.4, 129.5, 129.7, 141.5, 145.8, 169.7, 177.2;  $\nu_{\max}$ : 1139, 1206, 1259, 1443, 1490, 1582, 1728  $\text{cm}^{-1}$ .  $[\alpha]_{\text{D}}^{25} = -47.4$  ( $c$  0.10,  $\text{CH}_2\text{Cl}_2$ , 97% ee). Enantiomeric excess of the product was determined by chiral stationary phase HPLC analysis using ChiralCel OD-H (hexanes/*i*-PrOH 90:10 at 1.0 mL/min), major enantiomer:  $t_{\text{R}} = 9.6$  min, minor enantiomer:  $t_{\text{R}} = 12.3$  min. Anal. calcd. for  $\text{C}_{30}\text{H}_{24}\text{BrNO}_4$ : C, 66.43; H, 4.46; N, 2.58. Found: C, 66.20; H, 4.58; N, 2.57.

**(R)-Methyl 2-(3-hydroxy-5-methyl-2-oxo-1-tritylindolin-3-yl)acetate (3g)**

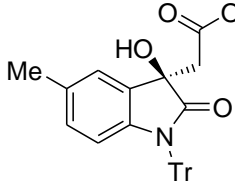 White solid; 92% yield; m.p. 156-159 °C;  $^1\text{H}$  (300 MHz,  $\text{CDCl}_3$ ): 2.18 (s, 3H),  $\delta$  2.94 (dd,  $J = 24.3, 15.6$  Hz, 2H), 3.62 (s, 3H), 3.67 (s, 1H), 6.13 (d,  $J = 8.4$  Hz, 1H), 6.67 (d,  $J = 8.4$  Hz, 1H), 7.10-7.22 (m, 10H), 7.40-7.42 (m, 6H);  $^{13}\text{C}$  (75 MHz,  $\text{CDCl}_3$ ):  $\delta$  21.0, 42.3, 52.2, 73.5, 74.5, 116.1, 123.9, 126.9, 127.7, 129.1, 129.3, 132.3, 140.8, 141.9, 170.2, 177.8;  $\nu_{\max}$ : 1060, 1196, 1327, 1436, 1486, 1597, 1711, 3368  $\text{cm}^{-1}$ .  $[\alpha]_{\text{D}}^{25} = -59.7$  ( $c$  0.11,  $\text{CH}_2\text{Cl}_2$ , 94% ee). Enantiomeric excess of the product was determined by chiral stationary phase HPLC analysis using ChiralCel OD-H (hexanes/*i*-PrOH 90:10 at 1.0 mL/min), major enantiomer:  $t_{\text{R}} = 9.4$  min, minor enantiomer:  $t_{\text{R}} = 12.3$  min. Anal. calcd. for  $\text{C}_{31}\text{H}_{27}\text{NO}_4$ : C, 77.97; H, 5.70; N, 2.93. Found: C, 77.71; H, 5.70; N, 3.04.

**(R)-Methyl 2-(3-hydroxy-5-methoxy-2-oxo-1-tritylindolin-3-yl)acetate (3h)**

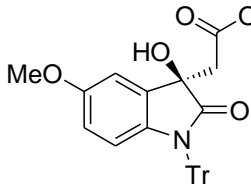 White solid; 90% yield; m.p. 176-178 °C;  $^1\text{H}$  (300 MHz,  $\text{CDCl}_3$ ):  $\delta$  2.97 (dd,  $J = 21.9, 15.3$  Hz, 2H), 3.69 (d,  $J = 9.3$  Hz, 6H), 6.20 (d,  $J = 9.0$  Hz, 1H), 6.46 (dd,  $J = 8.7$  Hz, 2.7 Hz, 1H), 6.93 (d,  $J = 2.7$  Hz, 1H), 7.17-7.28 (m, 8H), 7.44-7.47 (m, 6H);  $^{13}\text{C}$  (75 MHz,  $\text{CDCl}_3$ ):  $\delta$  42.4, 52.3, 55.7, 73.7, 74.5, 109.6, 113.7, 117.0, 127.0, 127.7, 129.3, 130.5, 136.3, 141.8, 155.6, 170.2, 177.6;  $\nu_{\max}$ : 1029, 1160, 1273, 1315, 1433, 1486, 1599, 1716, 3060  $\text{cm}^{-1}$ .  $[\alpha]_{\text{D}}^{25} = -53.1$  ( $c$  0.10,  $\text{CH}_2\text{Cl}_2$ , 94% ee). Enantiomeric excess of the product was determined by chiral stationary phase HPLC analysis using ChiralCel OD-H (hexanes/*i*-PrOH 90:10 at 1.0 mL/min), major enantiomer:  $t_{\text{R}} = 12.6$  min, minor enantiomer:  $t_{\text{R}} = 16.6$  min. Anal. calcd. for  $\text{C}_{31}\text{H}_{27}\text{NO}_5$ : C, 75.44; H, 5.51; N, 2.84. Found: C, 75.19; H, 5.49; N, 2.86.

**(R)-Methyl 2-(5-fluoro-3-hydroxy-2-oxo-1-tritylindolin-3-yl)acetate (3i)**

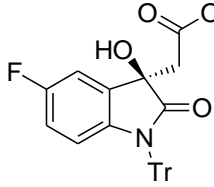 White solid; 88% yield; m.p. 194-196 °C;  $^1\text{H}$  (300 MHz,  $\text{CDCl}_3$ ):  $\delta$  2.89 (dd,  $J = 18.0, 15.6$  Hz, 2H), 3.59 (s, 3H), 3.67 (s, 1H), 6.15 (dd,  $J = 9.0, 4.2$  Hz, 1H), 6.54 (td,  $J = 11.7, 8.7, 2.7$  Hz, 1H), 6.98 (dd,  $J = 7.2, 2.7$  Hz, 1H), 7.09-7.20 (m, 9H), 7.33-7.36 (m, 6H);  $^{13}\text{C}$  (75 MHz,  $\text{CDCl}_3$ ):  $\delta$  42.3, 52.5, 73.6, 74.9, 111.2, 111.5, 115.1, 115.4, 117.3, 117.4, 127.3, 128.0, 129.4, 131.0, 131.1, 139.2, 141.7, 157.3, 160.5, 170.2, 177.7;  $\nu_{\max}$ : 1064, 1163, 1262, 1448, 1476, 1611, 1726, 3059  $\text{cm}^{-1}$ .  $[\alpha]_{\text{D}}^{25} = -35.8$  ( $c$  0.11,  $\text{CH}_2\text{Cl}_2$ , 95% ee). Enantiomeric excess of the product was determined by chiral stationary phase HPLC analysis using ChiralCel



OD-H (hexanes/*i*-PrOH 90:10 at 1.0 mL/min), major enantiomer:  $t_R = 9.4$  min, minor enantiomer:  $t_R = 13.8$  min. Anal. calcd. for  $C_{30}H_{24}FNO_4$ : C, 74.83; H, 5.02; N, 2.91. Found: C, 74.32; H, 5.55; N, 2.72.

**(*R*)-Methyl 2-(5-chloro-3-hydroxy-2-oxo-1-tritylindolin-3-yl)acetate (3j)**

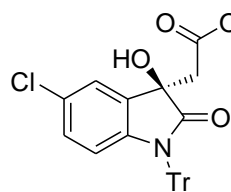

White solid; 84% yield; m.p. 184-185 °C;  $^1H$  (300 MHz,  $CDCl_3$ ):  $\delta$  3.12 (dd,  $J = 21.6, 15.6$  Hz, 2H), 3.78 (s, 3H), 6.35 (d,  $J = 8.7$  Hz, 1H), 7.00 (d,  $J = 8.7$  Hz, 1H), 7.31-7.42 (m, 10H), 7.54-7.56 (m, 6H);  $^{13}C$  (75 MHz,  $CDCl_3$ ):  $\delta$  40.3, 52.2, 74.2, 75.0, 115.0, 123.8, 125.4, 127.1, 127.8, 129.4, 129.5, 130.9, 141.5, 145.6, 169.8, 177.2;  $\nu_{max}$ : 1033, 1066, 1184, 1300, 1471, 1594, 1726, 3062, 3380  $cm^{-1}$ .  $[\alpha]_D^{25} = -26.9$  ( $c$  0.06, MeOH, 95% ee). Enantiomeric excess of the product was determined by chiral stationary phase HPLC analysis using ChiralCel OD-H (hexanes/*i*-PrOH 90:10 at 1.0 mL/min), major enantiomer:  $t_R = 8.8$  min, minor enantiomer:  $t_R = 13.0$  min. Anal. calcd. for  $C_{30}H_{24}ClNO_4$ : C, 72.36; H, 4.86; N, 2.81. Found: C, 72.37; H, 5.01; N, 2.78.

**(*R*)-Methyl 2-(5-bromo-3-hydroxy-2-oxo-1-tritylindolin-3-yl)acetate (3k)**

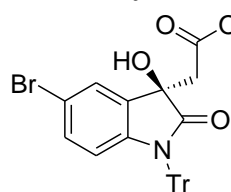

White solid; 89% yield; m.p. 201-203 °C;  $^1H$  (300 MHz,  $CDCl_3$ ):  $\delta$  2.99 (dd,  $J = 20.1, 15.6$  Hz, 2H), 3.69 (s, 3H), 3.76 (s, 1H), 6.18 (d,  $J = 8.7$  Hz, 1H), 7.01 (d,  $J = 8.7$  Hz, 1H), 7.19-7.28 (m, 10H), 7.42-7.45 (m, 6H);  $^{13}C$  (75 MHz,  $CDCl_3$ ):  $\delta$  42.1, 52.4, 73.3, 74.8, 115.8, 117.8, 126.6, 127.2, 127.8, 129.2, 131.3, 131.5, 141.4, 142.4, 170.0, 177.2;  $\nu_{max}$ : 1035, 1076, 1182, 1266, 1300, 1444, 1471, 1606, 1719, 3386  $cm^{-1}$ .  $[\alpha]_D^{25} = -35.8$  ( $c$  0.10,  $CH_2Cl_2$ , 93% ee). Enantiomeric excess of the product was determined by chiral stationary phase HPLC analysis using ChiralCel OD-H (hexanes/*i*-PrOH 90:10 at 1.0 mL/min), major enantiomer:  $t_R = 8.9$  min, minor enantiomer:  $t_R = 13.5$  min. Anal. calcd. for  $C_{30}H_{24}BrNO_4$ : C, 66.43; H, 4.43; N, 2.58. Found: C, 66.21; H, 4.62; N, 2.43.

**(*R*)-Methyl 2-(3-hydroxy-5-iodo-2-oxo-1-tritylindolin-3-yl)acetate (3l)**

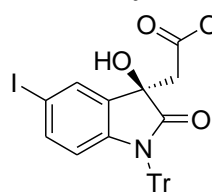

White solid; 91% yield; m.p. 127-129 °C;  $^1H$  (300 MHz,  $CDCl_3$ ):  $\delta$  2.97 (dd,  $J = 21.6, 15.6$  Hz, 2H), 3.68 (s, 3H), 3.74 (s, 1H), 6.06 (d,  $J = 8.7$  Hz, 1H), 7.17-7.27 (m, 11H), 7.40-7.43 (m, 6H), 7.60 (s, 1H);  $^{13}C$  (75 MHz,  $CDCl_3$ ):  $\delta$  42.2, 52.5, 73.3, 74.9, 86.1, 118.4, 127.3, 128.0, 129.4, 131.7, 132.3, 137.6, 141.6, 143.4, 170.1, 177.2;  $\nu_{max}$ : 1032, 1071, 1129, 1182, 1263, 1313, 1470, 1602, 1718, 3386  $cm^{-1}$ .  $[\alpha]_D^{25} = -65.4$  ( $c$  0.10, MeOH, 94% ee). Enantiomeric excess of the product was determined by chiral stationary phase HPLC analysis using ChiralCel OD-H (hexanes/*i*-PrOH 90:10 at 1.0 mL/min), major enantiomer:  $t_R = 8.2$  min, minor enantiomer:  $t_R = 12.4$  min. Anal. calcd. for  $C_{30}H_{24}INO_4$ : C, 61.13; H, 4.10; N, 2.38. Found: C, 61.26; H, 4.29; N, 2.33.

**(*R*)-Methyl 2-(3-hydroxy-5-nitro-2-oxo-1-tritylindolin-3-yl)acetate (3m)**

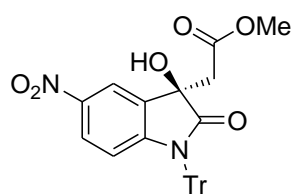

White solid; 88% yield; m.p. 228-229 °C;  $^1\text{H}$  (300 MHz,  $\text{CDCl}_3$ ):  $\delta$  3.00 (s, 2H), 3.60 (s, 4H), 3.74 (s, 1H), 6.35 (d,  $J = 9.0$  Hz, 1H), 7.12-7.23 (m, 9H), 7.33-7.37 (m, 6H), 7.78 (dd,  $J = 9.0, 6.3$  Hz, 1H), 8.11 (d,  $J = 9.0, 2.4$  Hz, 1H);  $^{13}\text{C}$  (75 MHz,  $\text{CDCl}_3$ ):  $\delta$  41.8, 52.5, 72.8, 75.4, 115.0, 119.1, 125.1, 127.4, 128.0, 129.2, 130.2, 141.0, 143.1, 149.4, 169.8, 177.7;  $\nu_{\text{max}}$ : 1036, 1078, 1111, 1163, 1183, 1217, 1271, 1332, 1419, 1445, 1475, 1513, 1613, 1727, 3402  $\text{cm}^{-1}$ .  $[\alpha]_{\text{D}}^{25} = -56.6$  ( $c$  0.09,  $\text{CH}_2\text{Cl}_2$ , 84% ee). Enantiomeric excess of the product was determined by chiral stationary phase HPLC analysis using ChiralCel OD-H (hexanes/*i*-PrOH 90:10 at 1.0 mL/min), major enantiomer:  $t_{\text{R}} = 12.8$  min, minor enantiomer:  $t_{\text{R}} = 20.2$  min. Anal. calcd. for  $\text{C}_{30}\text{H}_{24}\text{N}_2\text{O}_6$ : C, 70.86; H, 4.76; N, 5.51. Found: C, 70.61; H, 4.96; N, 5.55.

**(R)-Methyl 2-(6-bromo-3-hydroxy-2-oxo-1-tritylindolin-3-yl)acetate (3n)**

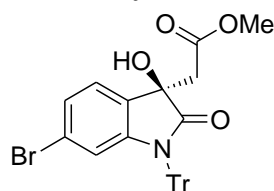

White solid; 92% yield; m.p. 220-223 °C;  $^1\text{H}$  (300 MHz,  $\text{CDCl}_3$ ):  $\delta$  2.97 (dd,  $J = 20.7, 15.3$  Hz, 2H), 3.66 (s, 3H), 3.72 (s, 1H), 7.09 (d,  $J = 7.5$  Hz, 2H), 7.20-7.30 (m, 10H), 7.42-7.44 (m, 7H);  $^{13}\text{C}$  (75 MHz,  $\text{CDCl}_3$ ):  $\delta$  42.0, 52.4, 73.0, 74.9, 119.4, 122.4, 124.5, 125.6, 127.2, 127.9, 128.2, 129.2, 144.3, 144.6, 170.0, 177.5;  $\nu_{\text{max}}$ : 1045, 1122, 1181, 1325, 1443, 1474, 1599, 1708, 3425  $\text{cm}^{-1}$ .  $[\alpha]_{\text{D}}^{25} = -68.3$  ( $c$  0.11,  $\text{CH}_2\text{Cl}_2$ , 93% ee). Enantiomeric excess of the product was determined by chiral stationary phase HPLC analysis using ChiralPak AD-H (hexanes/*i*-PrOH 90:10 at 1.0 mL/min), major enantiomer:  $t_{\text{R}} = 12.0$  min, minor enantiomer:  $t_{\text{R}} = 16.0$  min. Anal. calcd. for  $\text{C}_{30}\text{H}_{24}\text{BrNO}_4$ : C, 66.43; H, 4.46; N, 2.58. Found: C, 66.28; H, 4.56; N, 2.66.

**(R)-Methyl 2-(1-benzyl-7-bromo-3-hydroxy-2-oxoindolin-3-yl)acetate (3o)**

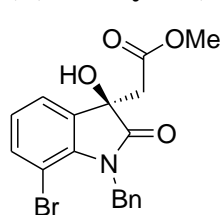

White solid; 91% yield; m.p. 153-155 °C;  $^1\text{H}$  (300 MHz,  $\text{CDCl}_3$ ):  $\delta$  2.86 (dd,  $J = 26.4, 15.9$  Hz, 2H), 3.56 (s, 3H), 4.37 (s, 1H), 5.23 (s, 2H), 6.80 (t,  $J = 7.8$  Hz, 1H), 7.08-7.26 (m, 7H);  $^{13}\text{C}$  (75 MHz,  $\text{CDCl}_3$ ):  $\delta$  41.2, 44.8, 52.5, 72.8, 103.1, 123.1, 124.7, 126.3, 127.2, 128.6, 132.4, 136.1, 136.9, 140.3, 170.6, 177.1;  $\nu_{\text{max}}$ : 1006, 1070, 1133, 1169, 1202, 1337, 1435, 1582, 1608, 1706, 1730, 3309  $\text{cm}^{-1}$ .  $[\alpha]_{\text{D}}^{25} = +28.3$  ( $c$  0.11,  $\text{CH}_2\text{Cl}_2$ , 93% ee). Enantiomeric excess of the product was determined by chiral stationary phase HPLC analysis using ChiralPak AD-H (hexanes/*i*-PrOH 90:10 at 1.0 mL/min), major enantiomer:  $t_{\text{R}} = 23.4$  min, minor enantiomer:  $t_{\text{R}} = 31.8$  min. Anal. calcd. for  $\text{C}_{18}\text{H}_{16}\text{BrNO}_4$ : C, 55.40; H, 4.13; N, 3.59. Found: C, 55.42; H, 4.09; N, 3.60.

**(R)-Methyl 2-(1-benzyl-5,7-dibromo-3-hydroxy-2-oxoindolin-3-yl)acetate (3p)**

White solid; 90% yield; m.p. 121-123 °C;  $^1\text{H}$  (300 MHz,  $\text{CDCl}_3$ ):  $\delta$  2.91 (dd,  $J = 21.9, 16.2$  Hz, 2H), 3.65 (s, 3H), 4.42 (s, 1H), 5.26 (s, 2H), 7.11-7.25 (m, 5H), 7.40 (d,  $J = 2.1$  Hz, 1H), 7.48 (d,  $J = 1.8$  Hz, 1H);  $^{13}\text{C}$  (75 MHz,  $\text{CDCl}_3$ ):  $\delta$  41.0, 44.9, 52.7, 72.8,

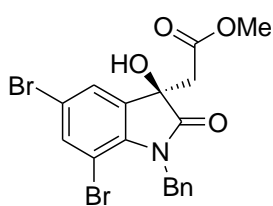

103.6, 116.4, 126.2, 126.5, 127.4, 128.7, 133.9, 136.6, 137.9, 139.6, 170.4, 176.6;  $\nu_{\max}$ : 1020, 1075, 1146, 1177, 1338, 1449, 1572, 1601, 1706, 1744, 3359  $\text{cm}^{-1}$ .  $[\alpha]_{\text{D}}^{25} = +18.9$  ( $c$  0.11,  $\text{CH}_2\text{Cl}_2$ , 93% ee). Enantiomeric excess of the product was determined by chiral stationary phase HPLC analysis using ChiralPak AD-H (hexanes/*i*-PrOH 90:10 at 1.0 mL/min),

major enantiomer:  $t_{\text{R}} = 16.2$  min, minor enantiomer:  $t_{\text{R}} = 21.5$  min. Anal. calcd. for  $\text{C}_{18}\text{H}_{15}\text{Br}_2\text{NO}_4$ : C, 46.08; H, 3.22; N, 2.83. Found: C, 46.21; H, 3.32; N, 2.83.

**(R)-Methyl 2-(1-benzyl-3-hydroxy-5,7-dimethyl-2-oxoindolin-3-yl)acetate (3q)**

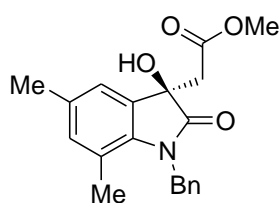

White solid; 82% yield; m.p. 149-150  $^{\circ}\text{C}$ ;  $^1\text{H}$  (300 MHz,  $\text{CDCl}_3$ ):  $\delta$  2.15 (d,  $J = 22.2$  Hz), 2.90 (dd,  $J = 34.5, 15.6$  Hz, 2H), 3.63 (s, 3H), 4.32 (s, 1H), 5.05 (s, 2H), 6.71 (s, 1H), 7.00 (s, 1H), 7.08-7.24 (m, 5H);  $^{13}\text{C}$  (75 MHz,  $\text{CDCl}_3$ ):  $\delta$  18.9, 21.0, 41.4, 45.3, 52.4, 73.0, 120.3, 122.5, 125.8, 127.3, 129.0, 130.0, 133.1, 134.6, 137.3, 138.2, 171.0, 177.4;  $\nu_{\max}$ : 1046,

1161, 1205, 1318, 1358, 1438, 1485, 1604, 1670, 1736, 3271  $\text{cm}^{-1}$ .  $[\alpha]_{\text{D}}^{25} = +12.2$  ( $c$  0.11,  $\text{CH}_2\text{Cl}_2$ , 94% ee). Enantiomeric excess of the product was determined by chiral stationary phase HPLC analysis using ChiralPak AD-H (hexanes/*i*-PrOH 90:10 at 1.0 mL/min), major enantiomer:  $t_{\text{R}} = 21.8$  min, minor enantiomer:  $t_{\text{R}} = 31.3$  min. Anal. calcd. for  $\text{C}_{20}\text{H}_{21}\text{NO}_4$ : C, 70.78; H, 6.24; N, 4.13. Found: C, 70.64; H, 6.32; N, 4.26.

**(S)-Methyl 2-[(R)-3-hydroxy-2-oxo-1-tritylindolin-3-yl]propanoate (3r)**

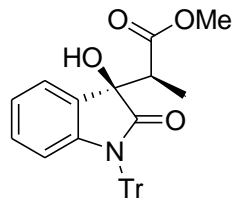

m.p. 92-95  $^{\circ}\text{C}$ ;  $^1\text{H}$  (300 MHz,  $\text{CDCl}_3$ ):  $\delta$  0.92 (d,  $J = 7.2$  Hz, 3H), 2.96 (dd,  $J = 14.4, 7.2$  Hz, 1H), 3.61 (s, 3H), 4.58 (s, 1H), 6.19 (d,  $J = 6.9$  Hz, 1H), 6.80-6.84 (m, 2H), 7.05-7.20 (m, 9H), 7.32-7.35 (m, 6H);  $^{13}\text{C}$  (75 MHz,  $\text{CDCl}_3$ ):  $\delta$  11.4, 45.9, 52.6, 74.7, 116.2, 122.4, 122.8, 123.4, 126.9, 127.7, 128.4, 128.9, 129.2, 141.9,

143.7, 173.7, 177.6;  $\nu_{\max}$ : 1002, 1183, 1310, 1448, 1607, 1727, 2950  $\text{cm}^{-1}$ .  $[\alpha]_{\text{D}}^{25} = -20.7$  ( $c$  0.16,  $\text{CH}_2\text{Cl}_2$ , dr: 80:20, 94% ee). Enantiomeric excess of the product was determined by chiral stationary phase HPLC analysis using a ChiralPak AD-H column (hexanes/*i*-PrOH 81:19 at 0.7 mL/min), major diastereomer:  $t_{\text{R}} = 21.8$  min (major enantiomer),  $t_{\text{R}} = 25.7$  min (minor enantiomer); minor diastereomer:  $t_{\text{R}} = 18.8$  min (major enantiomer),  $t_{\text{R}} = 15.1$  min (minor enantiomer). Anal. calcd. for  $\text{C}_{31}\text{H}_{27}\text{NO}_4$ : C, 77.97; H, 5.70; N, 2.93. Found: C, 78.02; H, 5.68; N, 2.95.

**(R)-methyl 3-hydroxy-4-oxo-4-phenylbutanoate (6a)**

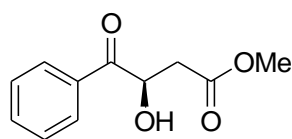

Yellow oil; 61% yield;  $^1\text{H}$  (300 MHz,  $\text{CDCl}_3$ ):  $\delta$  2.42 (dd,  $J = 15.9, 7.8$  Hz, 1H), 2.69 (dd,  $J = 15.9, 3.3$  Hz, 1H), 3.52 (s, 3H), 3.80 (br, 1H), 5.53 (br, 1H), 7.30 (t,  $J = 7.8$  Hz, 2H), 7.42 (t,  $J = 7.5$  Hz, 1H), 7.74 (d,  $J = 6.9$  Hz, 1H);  $^{13}\text{C}$  (75

MHz,  $\text{CDCl}_3$ ):  $\delta$  40.5, 52.3, 70.4, 128.7, 129.0, 133.3, 134.2, 170.8, 199.8;  $\nu_{\max}$ : 1099, 1165, 1264, 1438, 1597, 1683, 1733, 3461  $\text{cm}^{-1}$ .  $[\alpha]_{\text{D}}^{25} = -10.6$  ( $c$  0.10,  $\text{CH}_2\text{Cl}_2$ , 87% ee). Enantiomeric excess of the product was determined by chiral stationary phase

Enantiomeric excess of the product was determined by chiral stationary phase HPLC analysis using a ChiralCel OD-H column (hexanes/*i*-PrOH 92:8 at 1.0 mL/min), major enantiomer:  $t_R = 18.9$  min, minor enantiomer:  $t_R = 22.7$  min. Anal. calcd. for  $C_{11}H_{12}O_4$ : C, 63.45; H, 5.81. Found: C, 63.35; H, 5.83.

**(*R*)-methyl 3-hydroxy-4-oxo-4-(4-methoxyphenyl)butanoate (6b)**

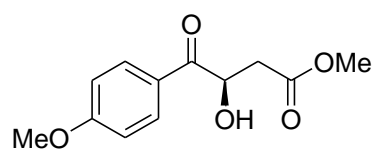

Brown oil; 66% yield;  $^1H$  (300 MHz,  $CDCl_3$ ):  $\delta$  2.50 (dd,  $J = 15.9, 8.4$  Hz, 1H), 2.79 (dd,  $J = 15.9, 3.3$  Hz, 1H), 3.66 (s, 3H), 3.81 (s, 3H), 5.33 (dd,  $J = 8.4, 3.3$  Hz, 1H), 6.90 (d,  $J = 9.0$  Hz, 2H), 7.86 (d,  $J = 9.0$  Hz, 1H);  $^{13}C$  (75 MHz,  $CDCl_3$ ):  $\delta$  41.2, 52.6, 56.0, 70.1, 114.5, 126.0, 131.3, 164.5, 171.2, 198.2;  $\nu_{max}$ : 784, 985, 1107, 1168, 1244, 1376, 1600, 1738, 2981  $cm^{-1}$ .  $[\alpha]_D^{25} = 42.5$  ( $c$  0.04,  $CH_2Cl_2$ , 84% ee). Enantiomeric excess of the product was determined by chiral stationary phase HPLC analysis using a ChiralPak ID column (hexanes/*i*-PrOH 85:15 at 1.0 mL/min), major enantiomer:  $t_R = 79.9$  min, minor enantiomer:  $t_R = 60.9$  min.

**(*R*)-2-(3-hydroxy-2-oxo-1-tritylindolin-3-yl)-*N*-methylacetamide (7)**

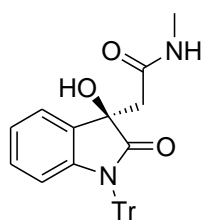

White solid; 90% yield; m.p. 218-220 °C;  $^1H$  (300 MHz,  $CDCl_3$ ):  $\delta$  2.43 (d,  $J = 14.7$  Hz, 1H), 2.59-2.64 (m, 4H), 5.09 (s, 1H), 6.18 (d,  $J = 6.6$  Hz, 1H), 6.82 (d,  $J = 3.6$  Hz, 1H), 7.01-7.33 (m, 15H);  $^{13}C$  (75 MHz,  $CDCl_3$ ):  $\delta$  26.4, 42.9, 74.2, 74.4, 116.1, 122.8, 123.5, 126.9, 127.7, 128.4, 129.1, 130.1, 141.7, 142.5, 170.2, 178.1;  $\nu_{max}$ : 1002, 1033, 1154, 1314, 1449, 1534, 1597, 1649, 1670, 1720, 3418, 3639  $cm^{-1}$ .  $[\alpha]_D^{25} = -0.94$  ( $c$  0.10,  $CH_2Cl_2$ , 96% ee). Enantiomeric excess of the product was determined by chiral stationary phase HPLC analysis using a ChiralPak AD-H column (hexanes/*i*-PrOH 85:15 at 1.0 mL/min), major enantiomer:  $t_R = 10.3$  min, minor enantiomer:  $t_R = 9.0$  min. Anal. calcd. for  $C_{30}H_{26}N_2O_3$ : C, 77.90; H, 5.67; N, 6.06. Found: C, 77.70; H, 6.27; N, 5.58.

**(*R*)-3-Hydroxy-1-methyl-3-(phenylethynyl)pyrrolidine-2,5-dione (9)**

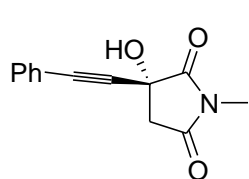

Yellow oil; 76% yield;  $^1H$  (500 MHz,  $CDCl_3$ ):  $\delta$  3.03 (d,  $J = 21.5$  Hz, 4H), 3.23 (d,  $J = 18.5$  Hz, 1H), 3.81 (br, 1H), 5.53 (br, 1H), 7.23-7.38 (m, 5H);  $^{13}C$  (125 MHz,  $CDCl_3$ ):  $\delta$  25.7, 44.8, 68.7, 85.4, 87.6, 121.1, 128.6, 129.7, 132.2, 173.3, 175.6;  $\nu_{max}$ : 686, 755, 993, 1109, 1273, 1380, 1437, 1689, 1786, 2228, 2202  $cm^{-1}$ .  $[\alpha]_D^{25} = 20.0$  ( $c$  0.06,  $CH_2Cl_2$ , 76% ee). Enantiomeric excess of the product was determined by chiral stationary phase HPLC analysis using a ChiralPak IB column (hexanes/*i*-PrOH 90:10 at 1.0 mL/min), major enantiomer:  $t_R = 11.8$  min, minor enantiomer:  $t_R = 14.5$  min.

**(3*aR*,8*aS*)-8-Trityl-3,3*a*,8,8*a*-tetrahydro-2*H*-furo[2,3-*b*]indol-3*a*-ol (10)**

Pale yellow solid; 64% yield;  $^1H$  (300 MHz,  $CDCl_3$ ):  $\delta$  2.43-2.49 (m, 2H), 3.71 (ddd,  $J = 15.3, 9.6, 4.8$  Hz, 1H), 4.00 (ddd,  $J = 8.7, 6.6, 2.1$  Hz, 1H), 5.30 (s, 1H), 5.82 (s,  $J$

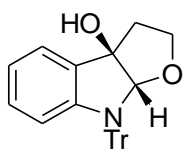

= 8.1 Hz, 1H), 6.68 (t,  $J = 6.6$  Hz, 1H), 6.78 (t,  $J = 7.8$  Hz, 1H), 7.22-7.41 (m, 16H);  $^{13}\text{C}$  (75 MHz,  $\text{CDCl}_3$ ):  $\delta$  40.1, 67.4, 75.8, 86.4, 101.7, 114.5, 118.8, 123.2, 127.0, 129.0, 130.6, 131.3, 143.2, 150.1;  $\nu_{\text{max}}$ : 1012, 1107, 1177, 1370, 1444, 1478, 1602, 1711  $\text{cm}^{-1}$ .  $[\alpha]_{\text{D}}^{25} = -48.9$  ( $c$  0.11,  $\text{CH}_2\text{Cl}_2$ ). Anal. calcd. for  $\text{C}_{20}\text{H}_{21}\text{NO}_4$ : C, 83.03; H, 6.01; N, 3.34. Found: C, 82.81; H, 6.42; N, 3.31.

**(3a*R*,8a*S*)-3,3a,8,8a-Tetrahydro-2*H*-furo[2,3-*b*]indol-3a-ol (11)**<sup>23a,29</sup>

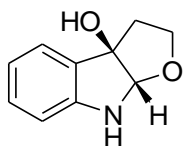

White solid; 83% yield;  $^1\text{H}$  (300 MHz,  $\text{CDCl}_3$ ):  $\delta$  2.22-2.28 (m, 1H), 2.33-2.43 (m, 1H), 3.54-3.62 (m, 3H), 3.94-4.00 (m, 1H), 5.31 (s, 1H), 6.53 (d  $J = 7.8$  Hz, 1H), 6.73 (t,  $J = 7.8$  Hz, 1H), 7.08 (t,  $J = 7.8$  Hz, 1H), 6.53 (d  $J = 7.2$  Hz, 1H);  $^{13}\text{C}$  (75 MHz,  $\text{CDCl}_3$ ):  $\delta$  41.1, 67.5, 89.5, 99.5, 109.6, 119.6, 124.2, 130.1, 130.4, 149.5;  $[\alpha]_{\text{D}}^{25} = -111.0$  ( $c$  0.10,  $\text{CH}_2\text{Cl}_2$ , 94% ee). Enantiomeric excess of the product was determined by chiral stationary phase HPLC analysis using an AD-H (hexanes: *i*-PrOH 81:19 at 0.7 mL/min), major enantiomer:  $t_{\text{R}} = 26.1$  min, minor enantiomer:  $t_{\text{R}} = 21.6$  min.

## Additional References

24. (a) Maeda, H.; Takahashi, K.; Ohmori, H. *Tetrahedron* **1998**, *54*, 12233. (b) Huang, Y.; Berthiol, F.; Stegink, B.; Pollard, M. M.; Minnaard, A. J. *Adv. Synth. Catal.* **2009**, *351*, 1423.
25. Cao, S.-H.; Zhang, X.-C.; Wei, Y.; Shi, M. *Eur. J. Org. Chem.* **2011**, 2668.
26. Aliwaka, K.; Mimura, S.; Numata, Y.; Mikami, K. *Eur. J. Org. Chem.* **2011**, 62.
27. (a) Shintani, R.; Takatsu, K.; Hayashi, T. *Chem. Commun.* **2010**, *46*, 6822. (b) Jung, H. H.; Buesking, A. W.; Ellman, J. A. *Org. Lett.* **2011**, *13*, 3912. (c) Guan, X.-Y.; Wei, Y.; Shi, M. *Chem. Eur. J.* **2010**, *16*, 13617.
28. (a) Lee, M.-Y.; Lin, H.-Y.; Cheng, F.; Chiang, W.; Kuo, Y.-H. *Food Chem. Toxicol.* **2008**, *46*, 1933-. (b) Kato, T.; Tomita, N.; Hoshikawa, M.; Ehara, K.; Shima, J.; Takahashi, N.; Sugiyama, H. *Heterocycles* **1998**, *47*, 497.
29. Kawasaki, T.; Takamiya, W.; Okamoto, N.; Nagaoka, M.; Hirayama, T. *Tetrahedron Lett.* **2006**, *47*, 5379.

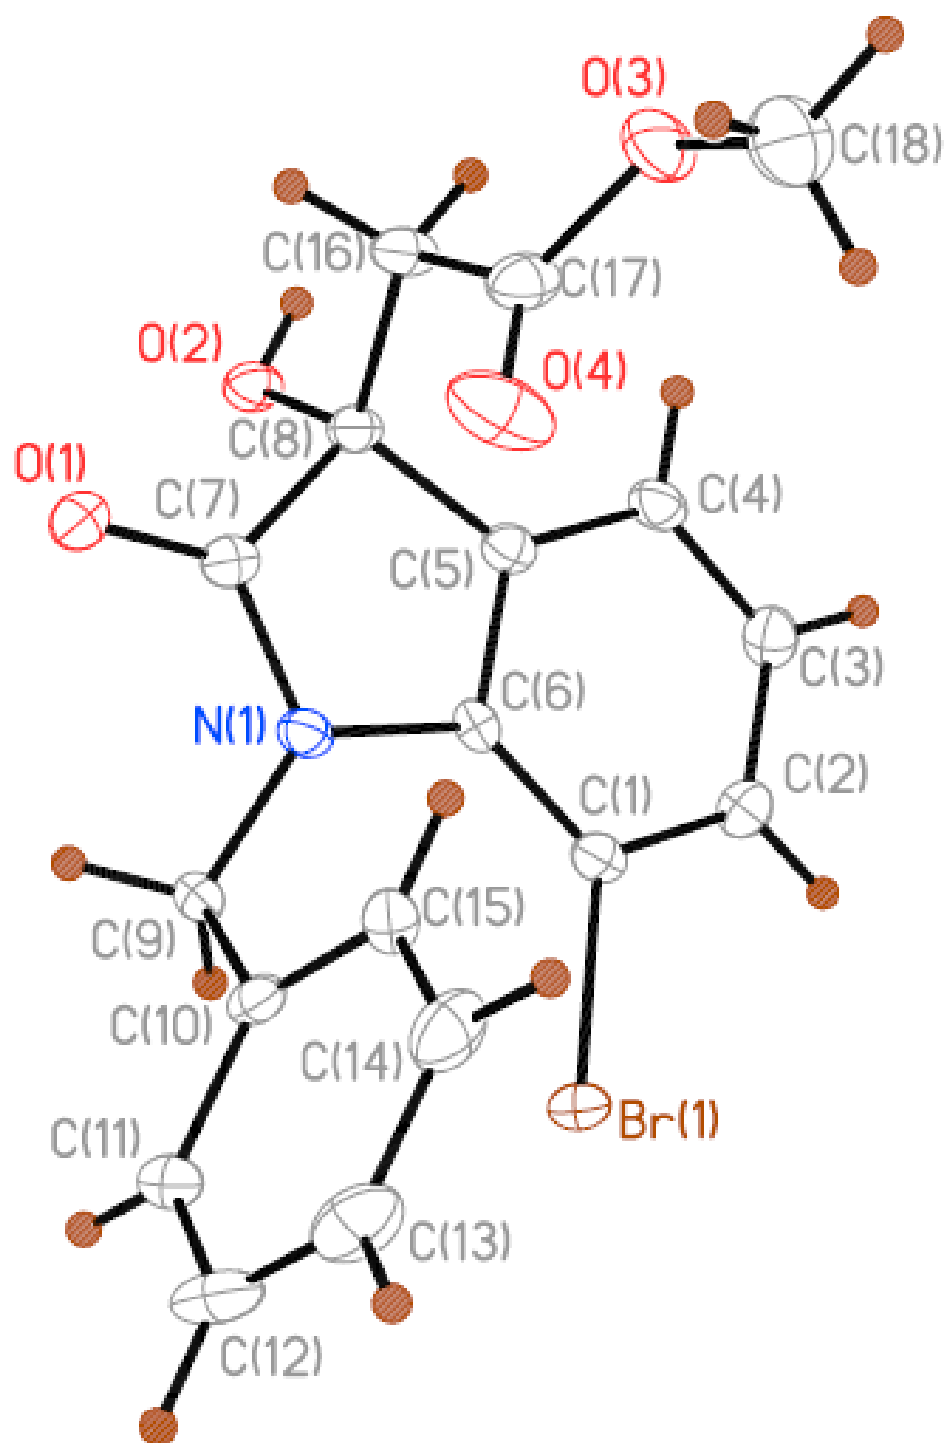

Figure S-1. ORTEP Drawing of Compound 3o.

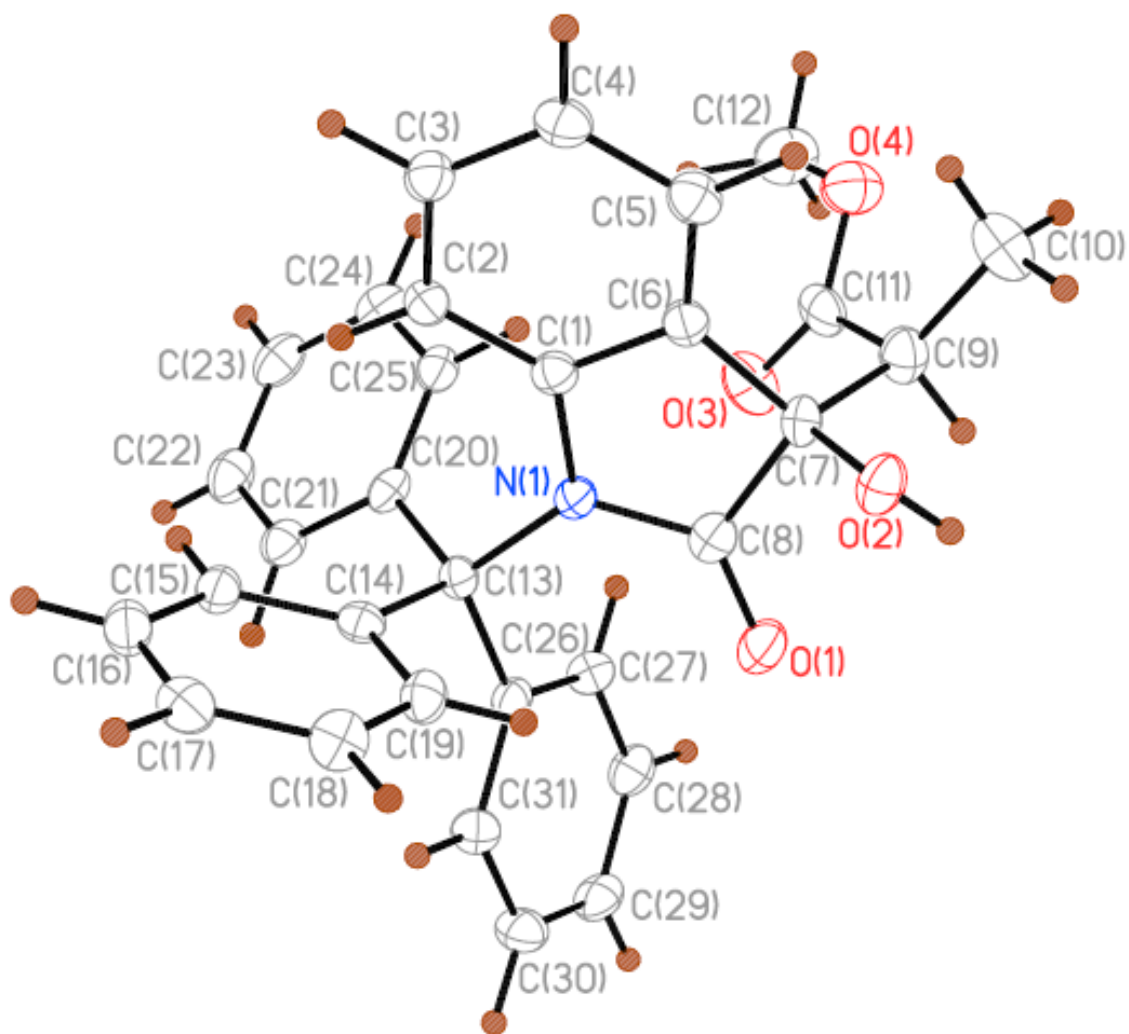

**Figure S-2. ORTEP Drawing of Compound 3r.**



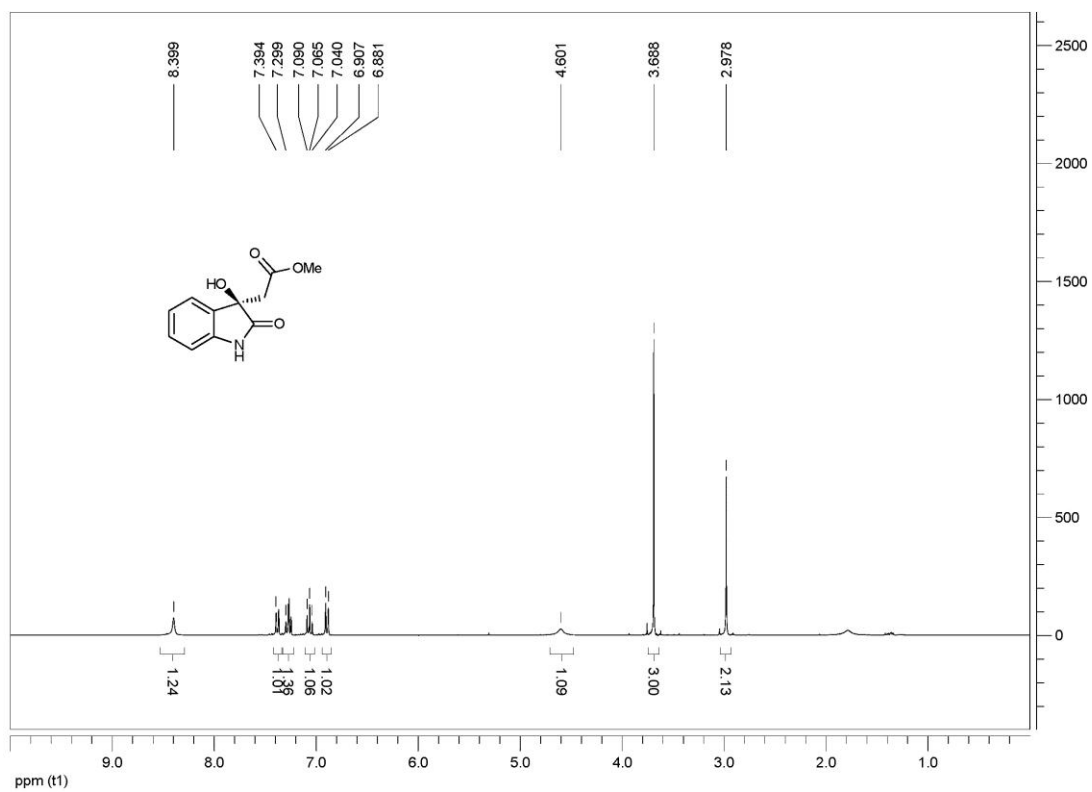

<sup>1</sup>H NMR of 3a

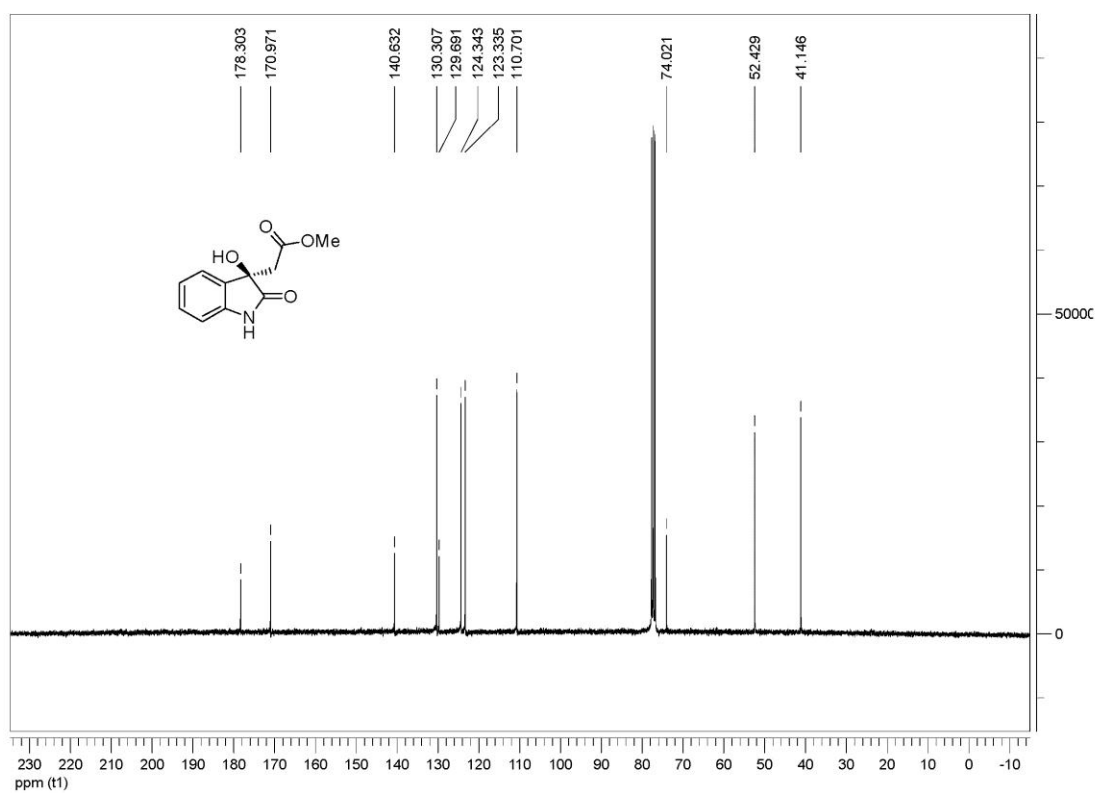

<sup>13</sup>C NMR of 3a

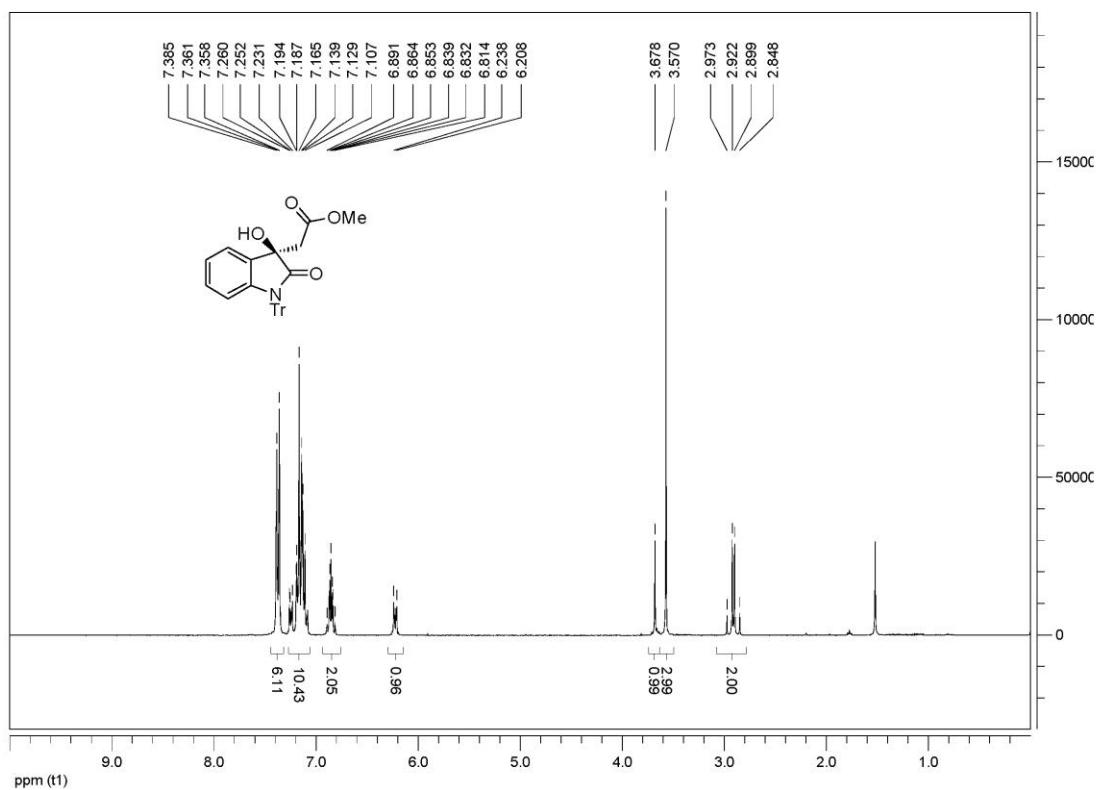

$^1\text{H}$  NMR of **3d**

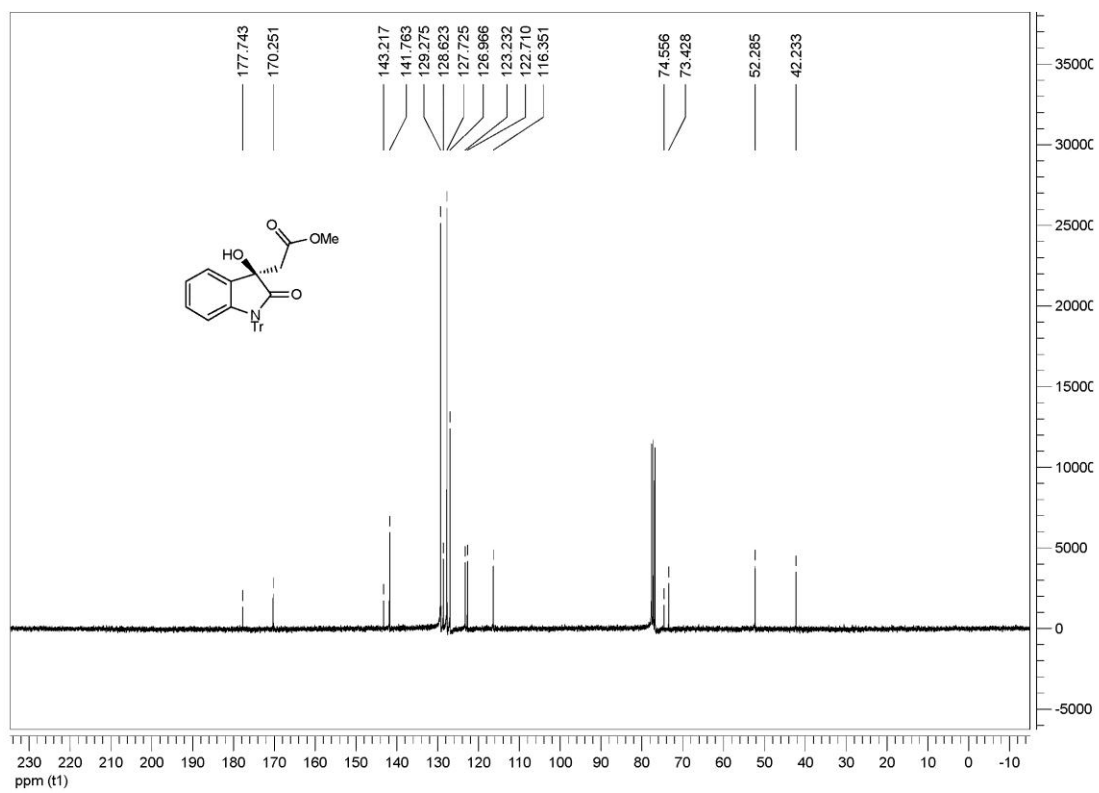

$^{13}\text{C}$  NMR of **3d**

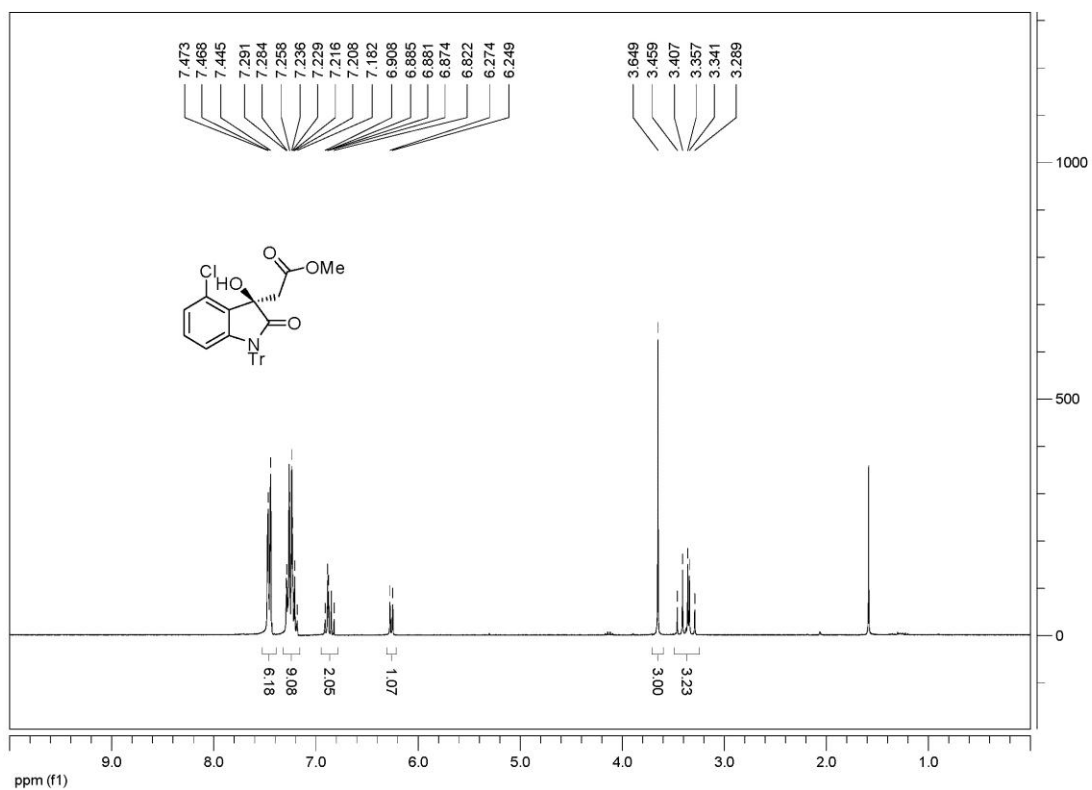

$^1\text{H}$  NMR of **3e**

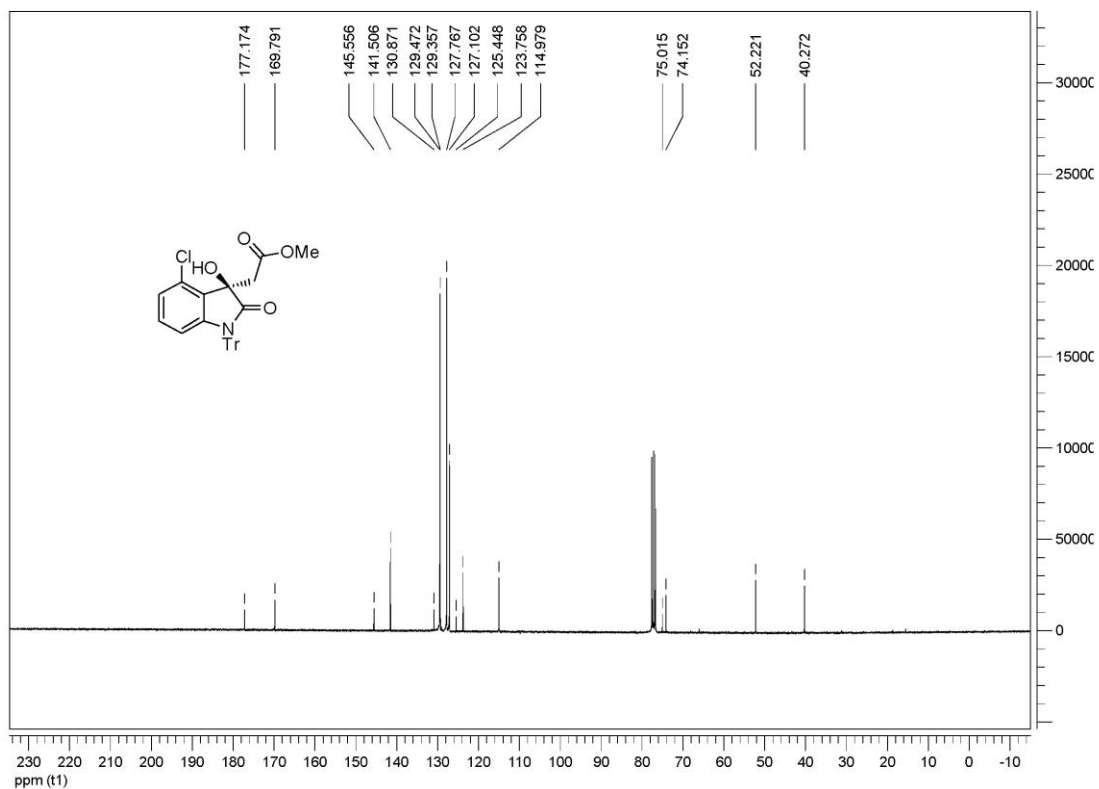

$^{13}\text{C}$  NMR of **3e**

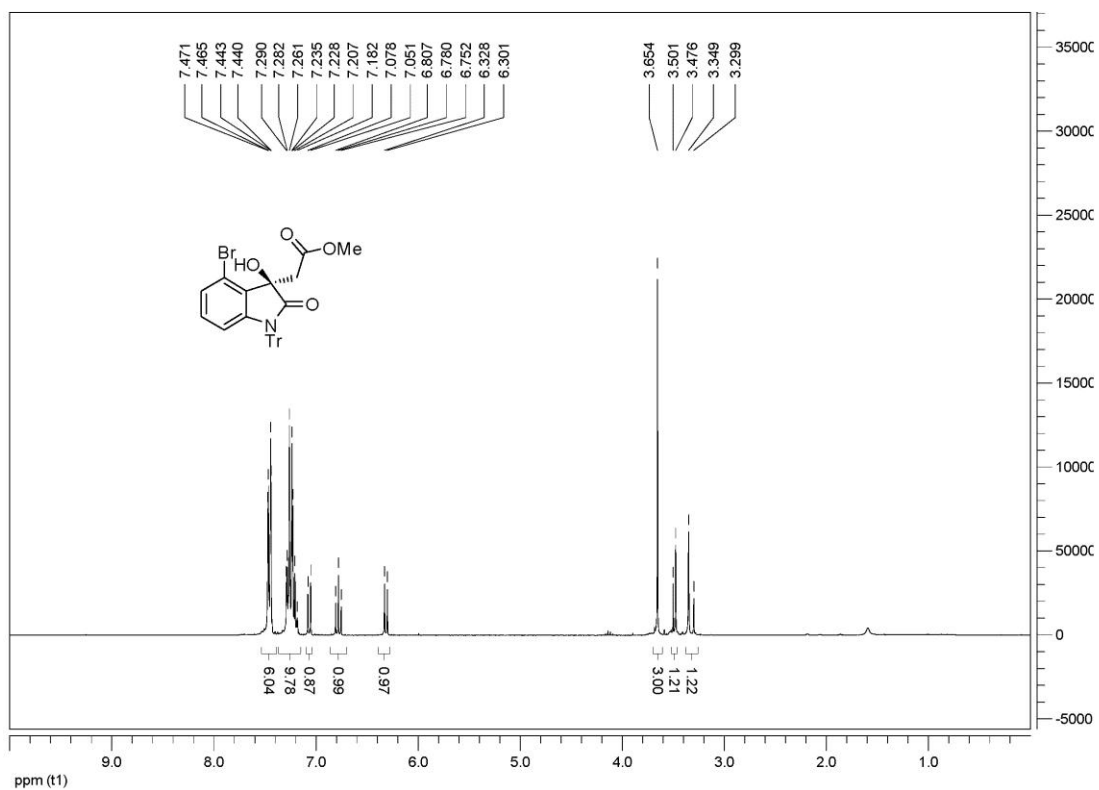

**<sup>1</sup>H NMR of 3f**

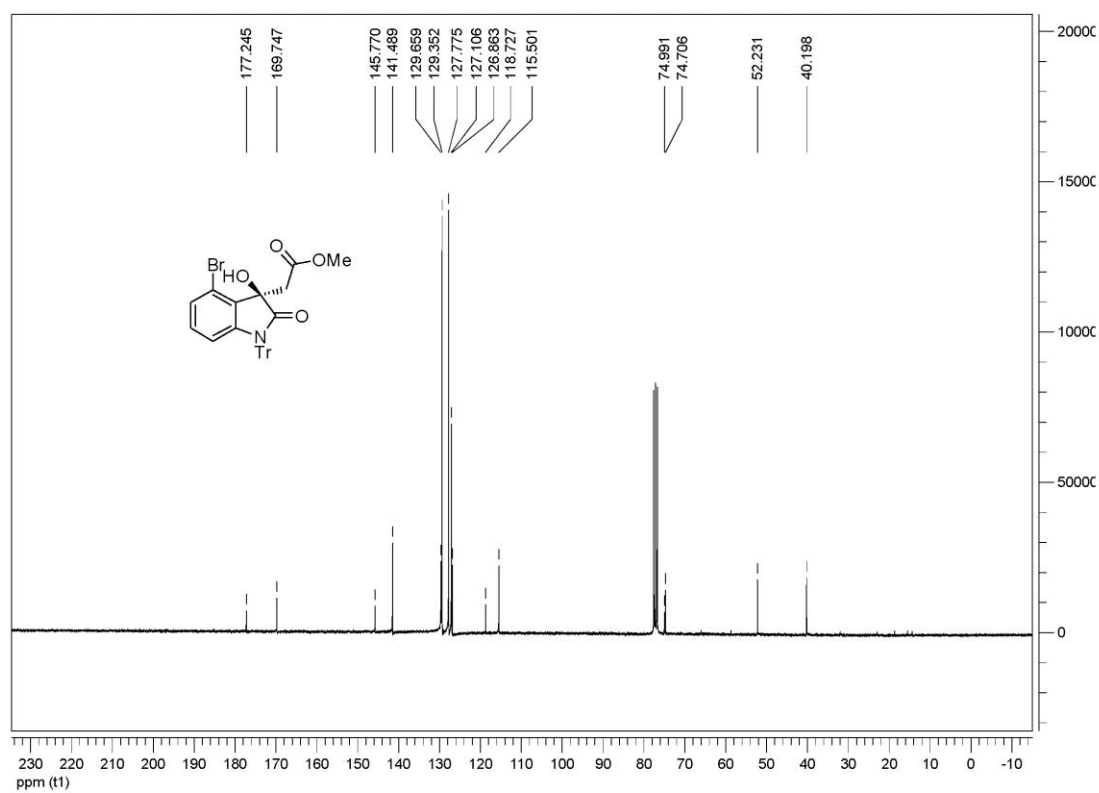

**<sup>13</sup>C NMR of 3f**

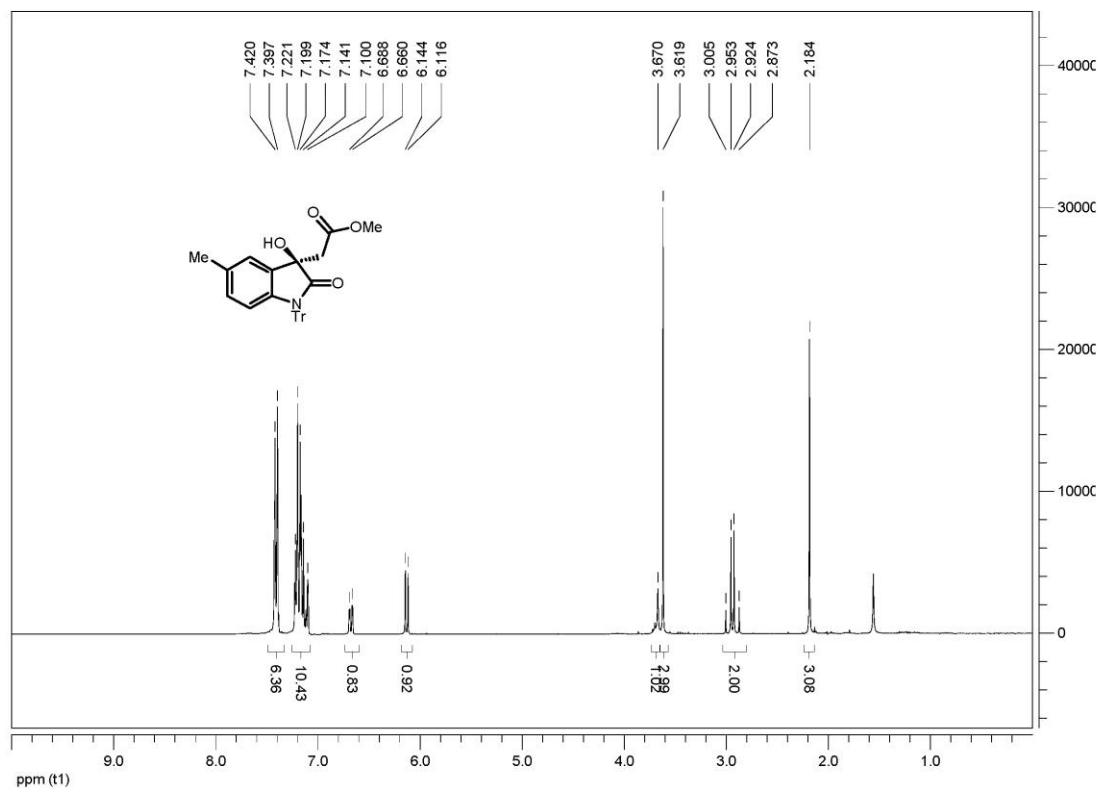

<sup>1</sup>H NMR of **3g**

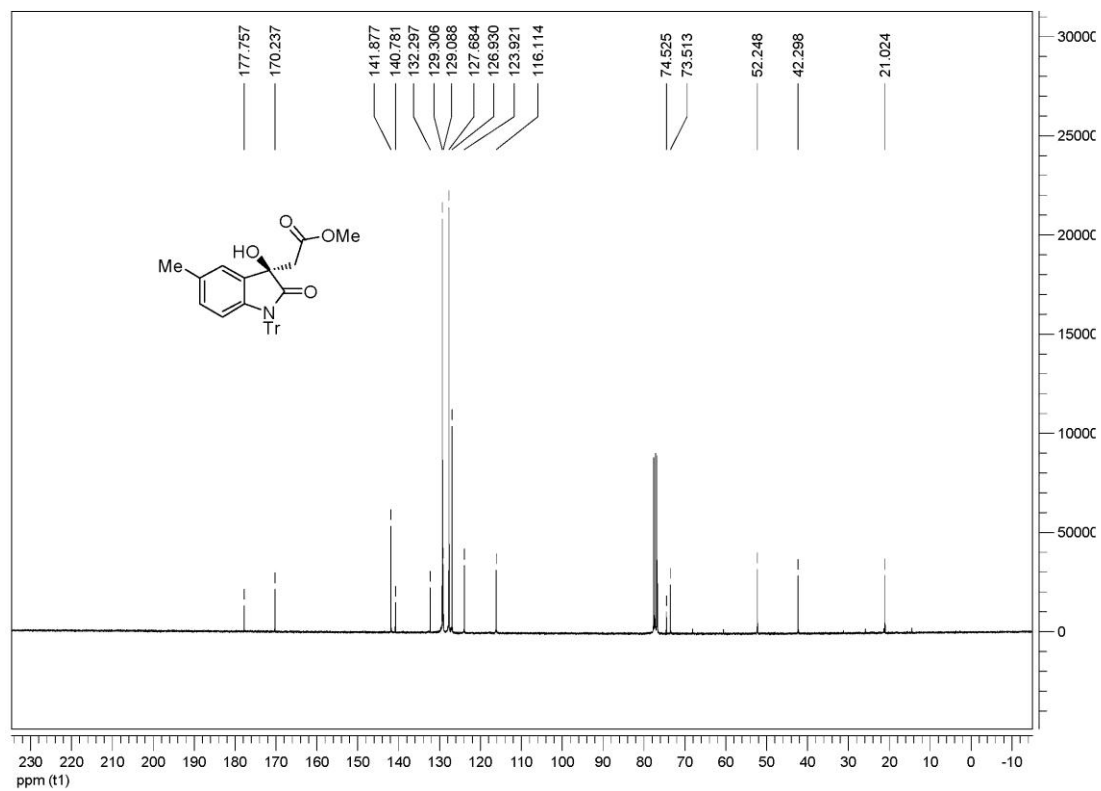

<sup>13</sup>C NMR of **3g**

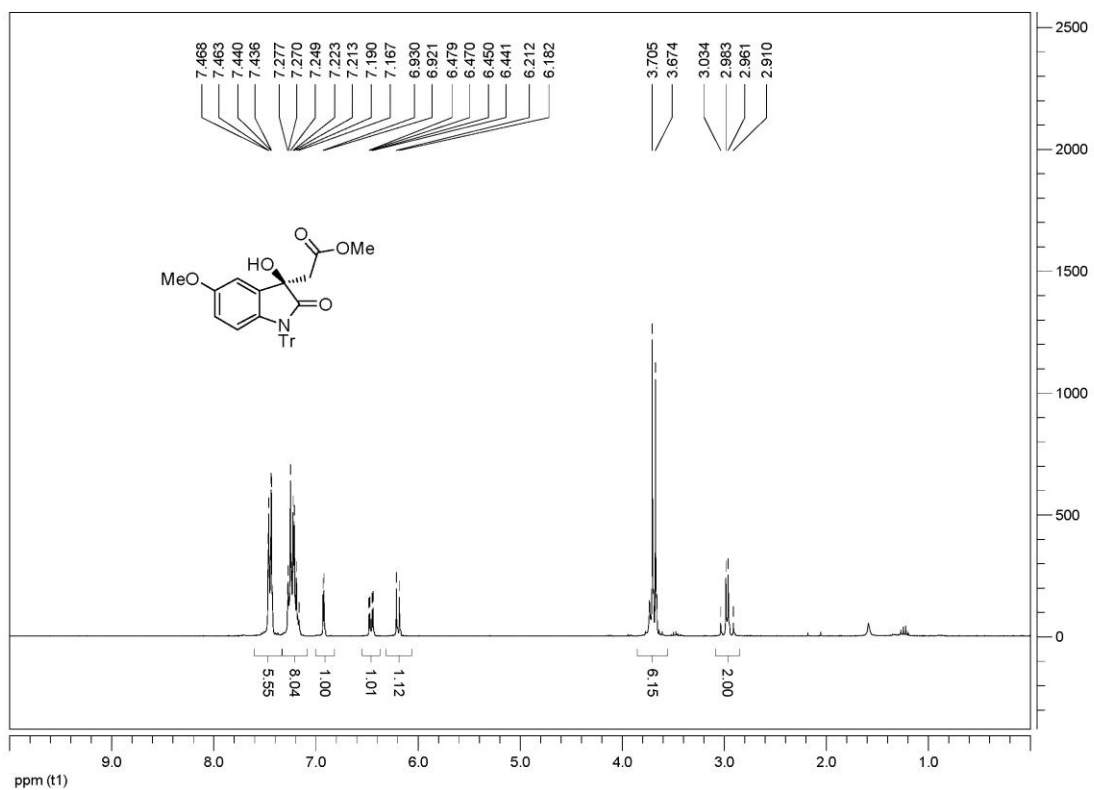

<sup>1</sup>H NMR of **3h**

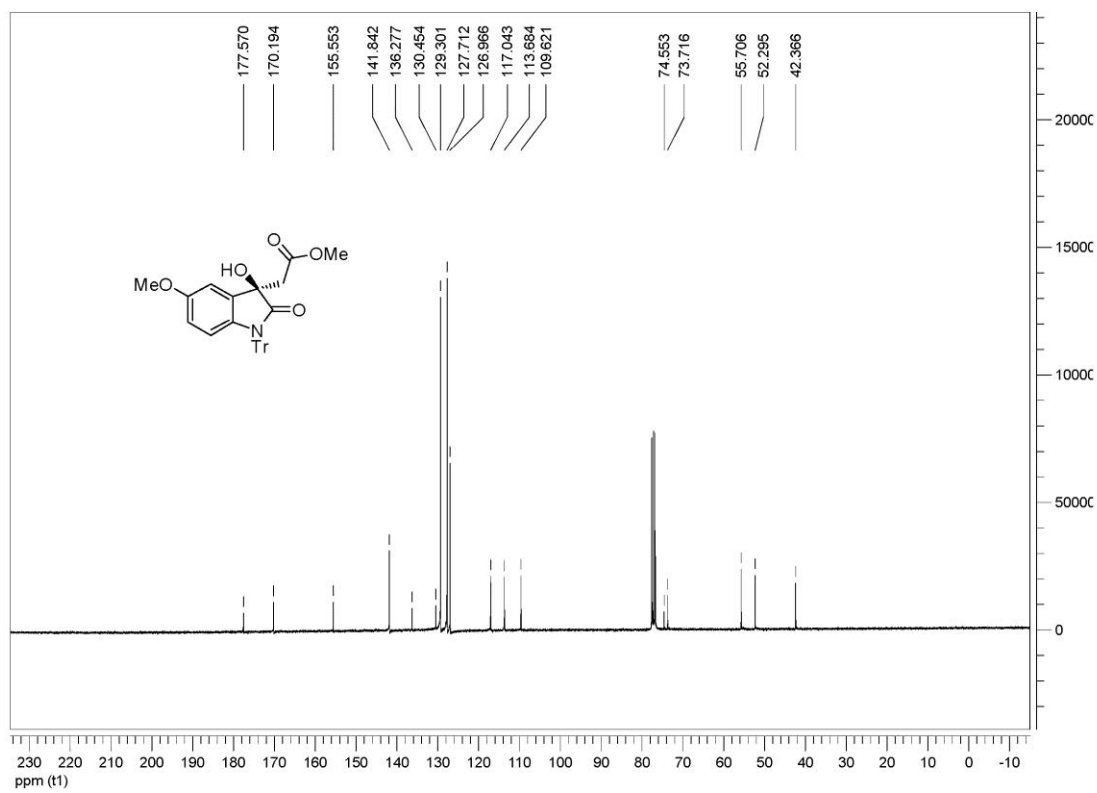

<sup>13</sup>C NMR of **3h**

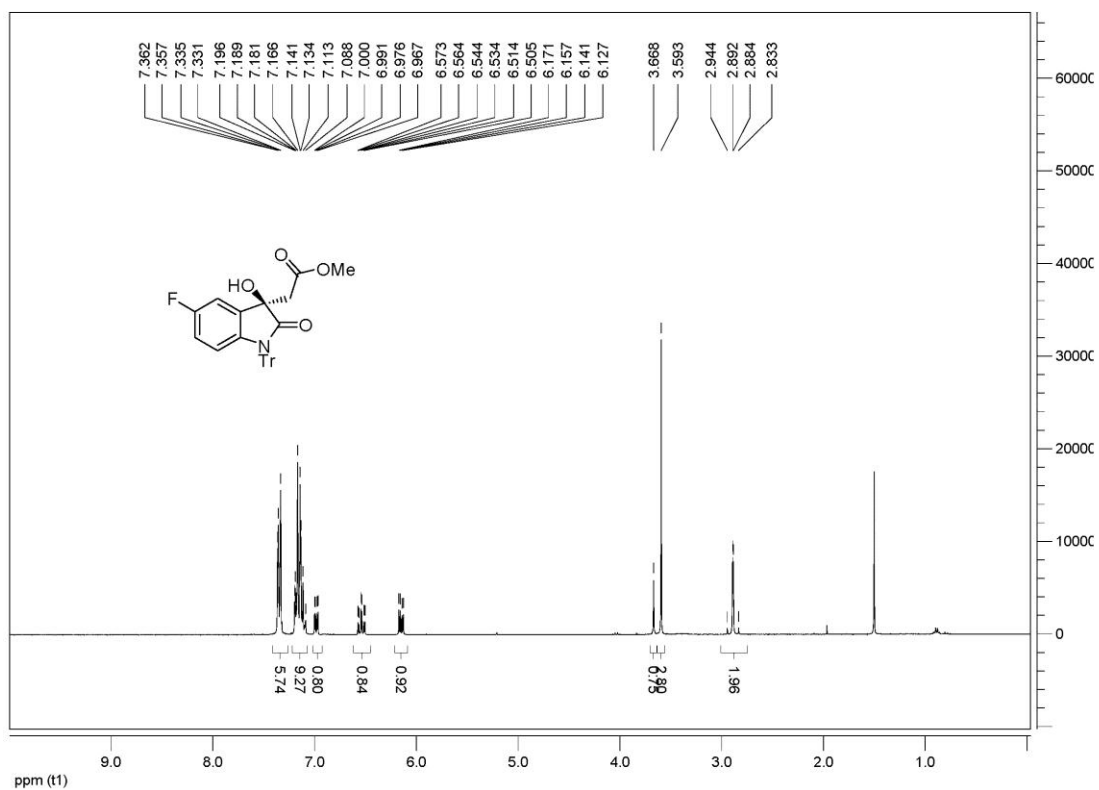

<sup>1</sup>H NMR of 3i

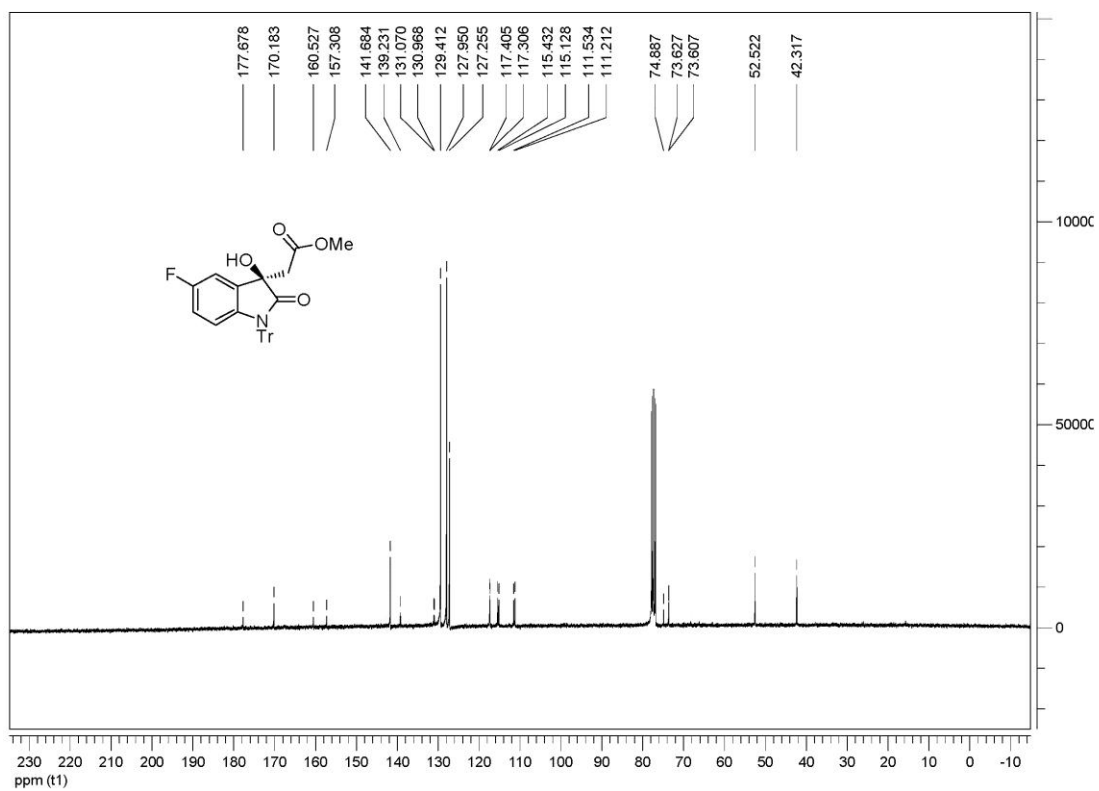

<sup>13</sup>C NMR of 3i

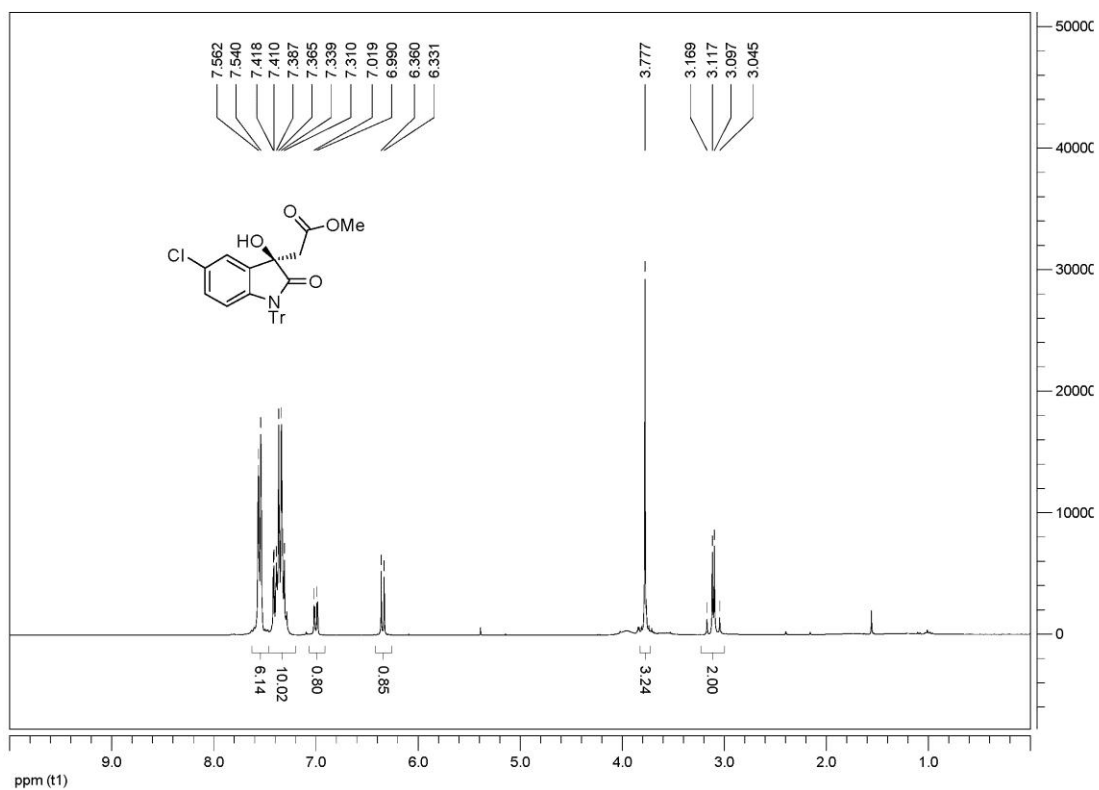

$^1\text{H NMR}$  of **3j**

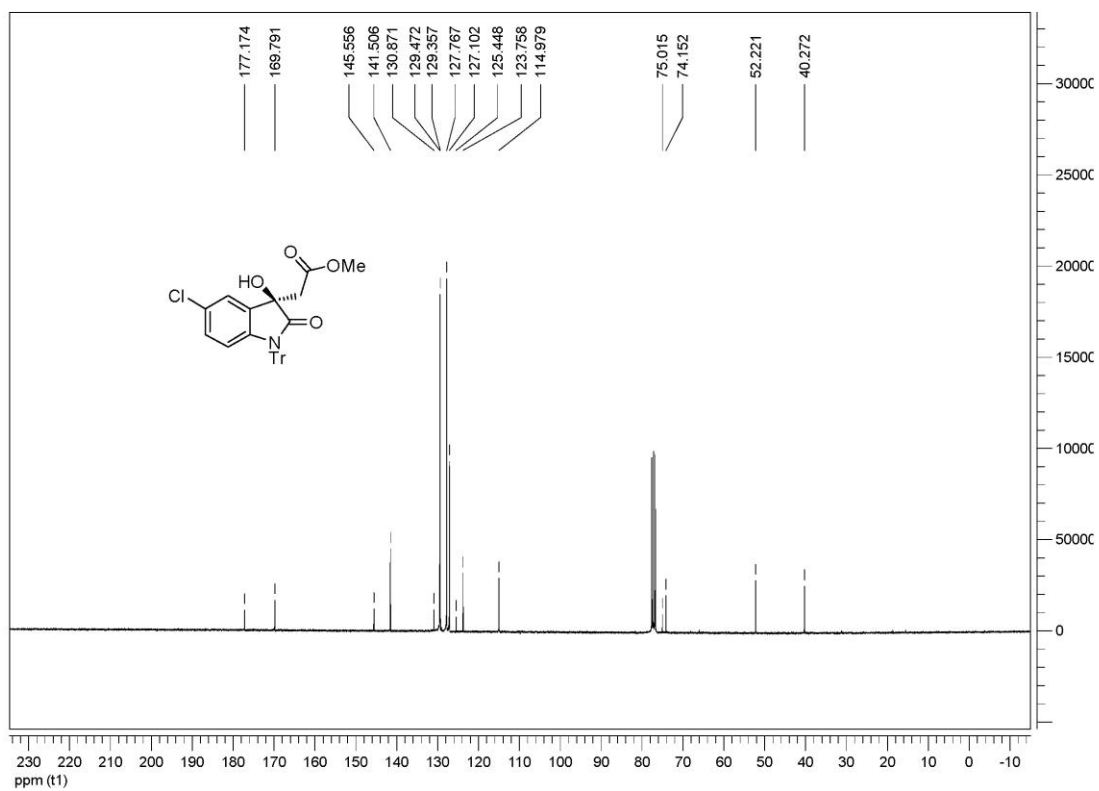

$^{13}\text{C NMR}$  of **3j**



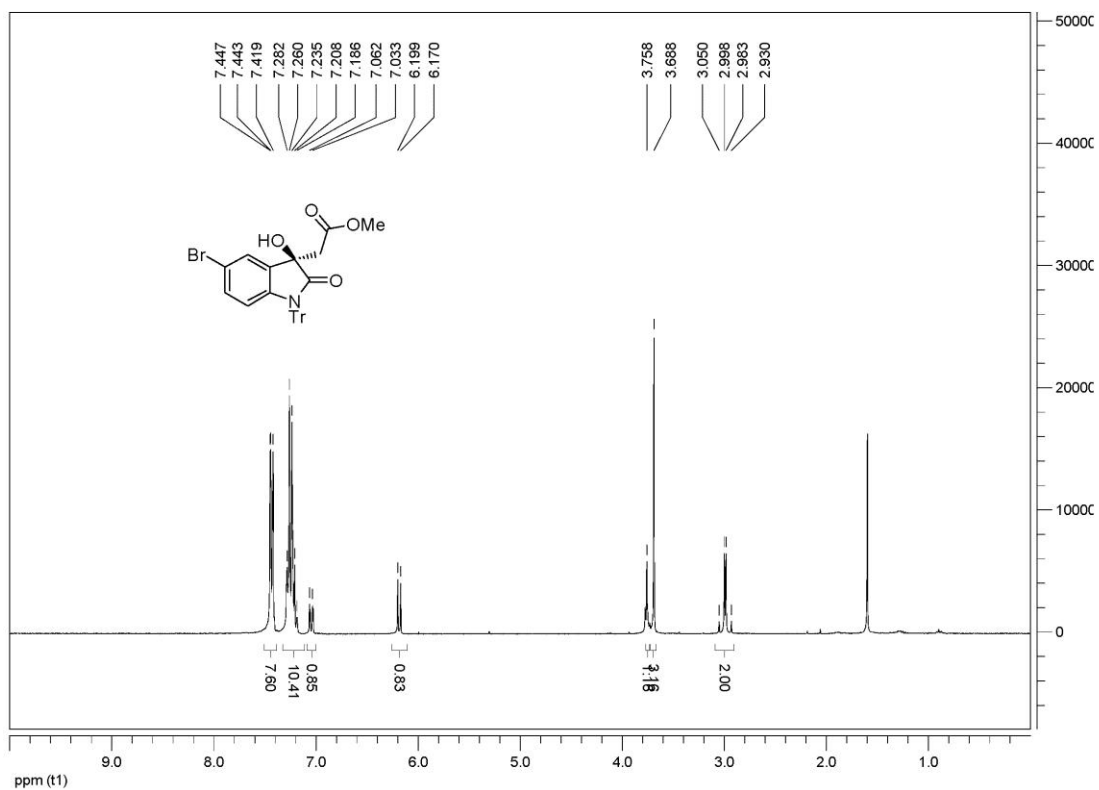

<sup>1</sup>H NMR of **3k**

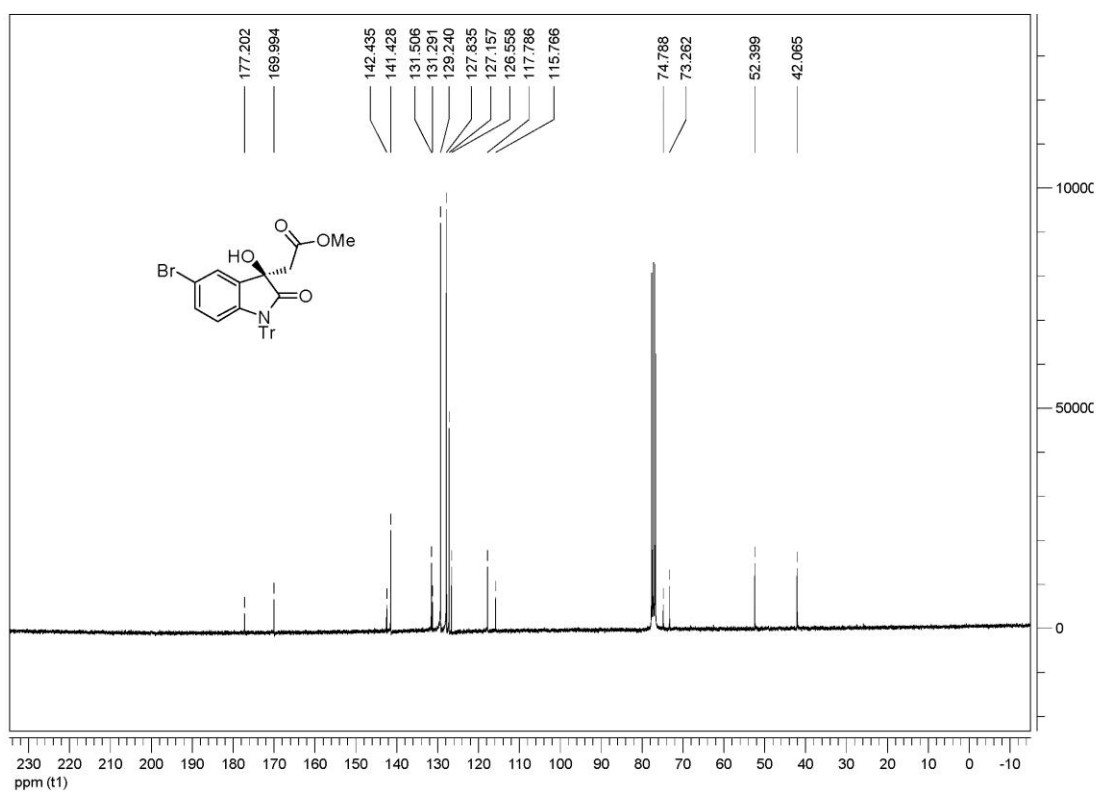

<sup>13</sup>C NMR of **3k**

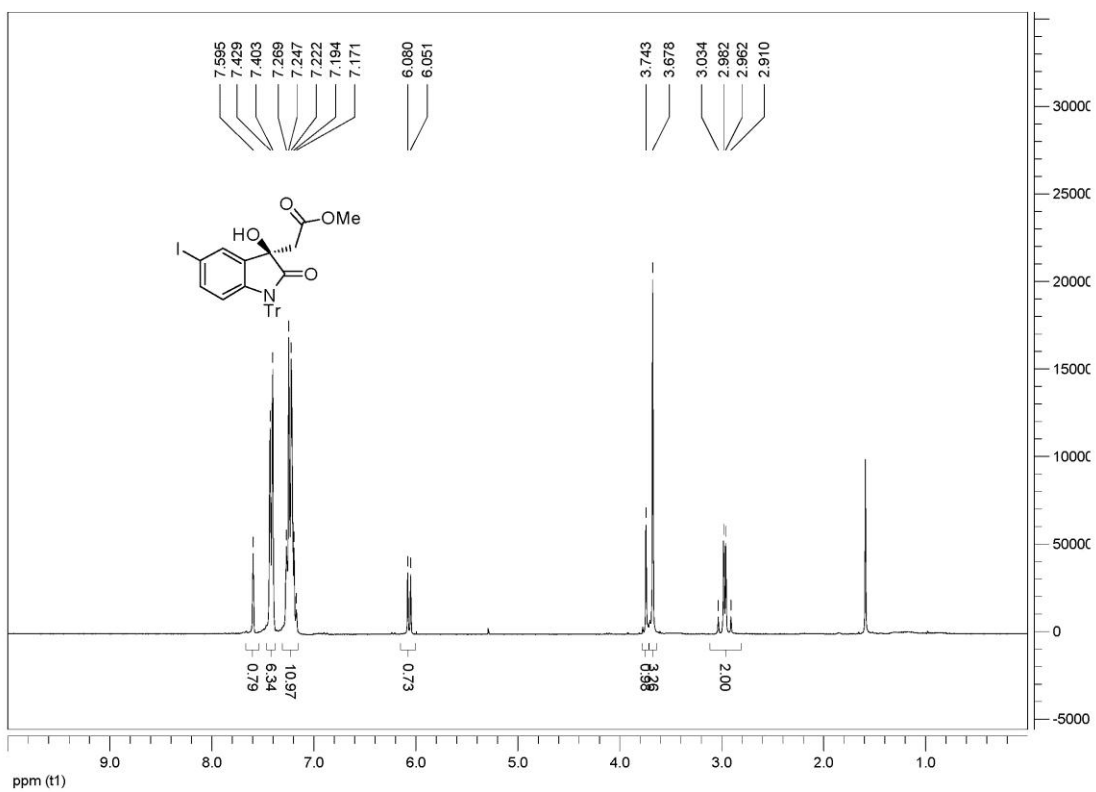

<sup>1</sup>H NMR of 31

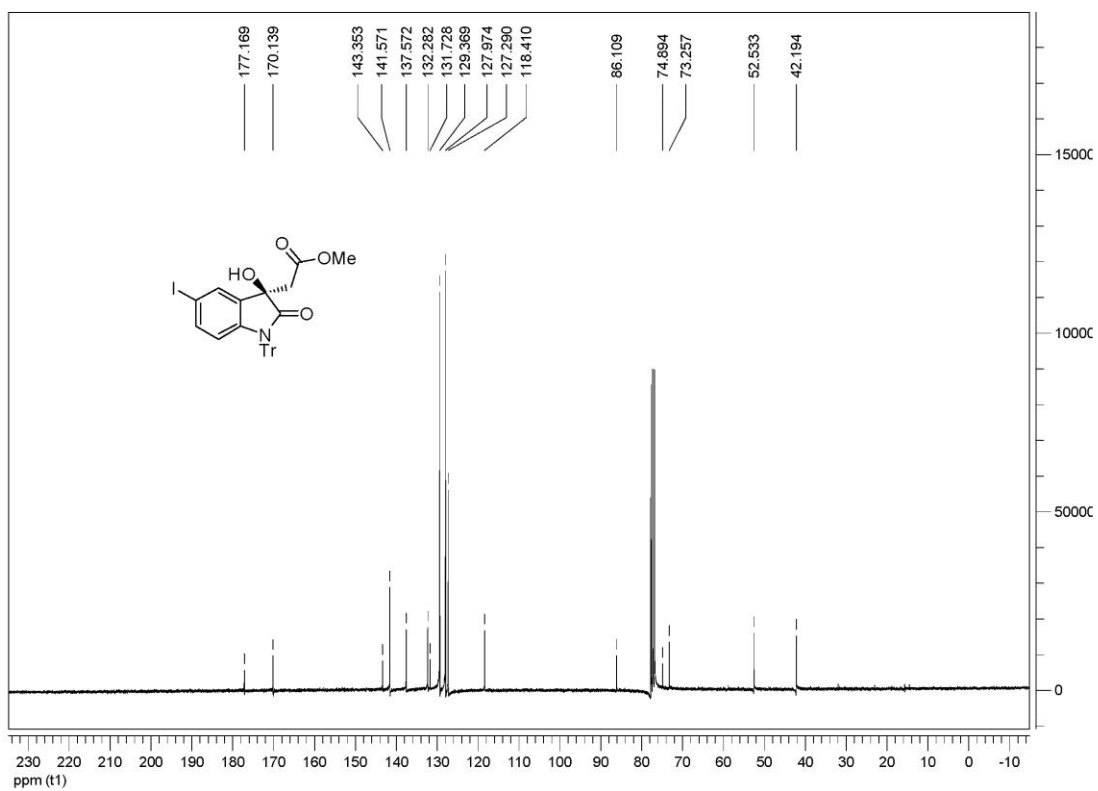

<sup>13</sup>C NMR of 31

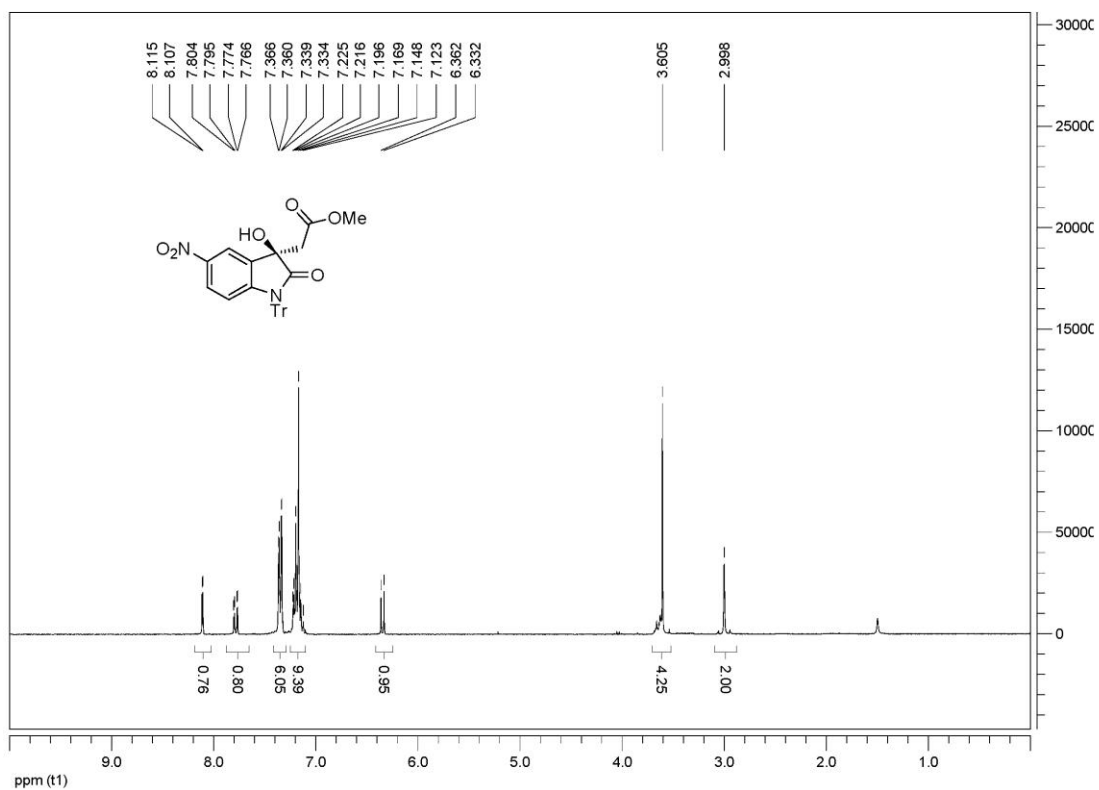

<sup>1</sup>H NMR of **3m**

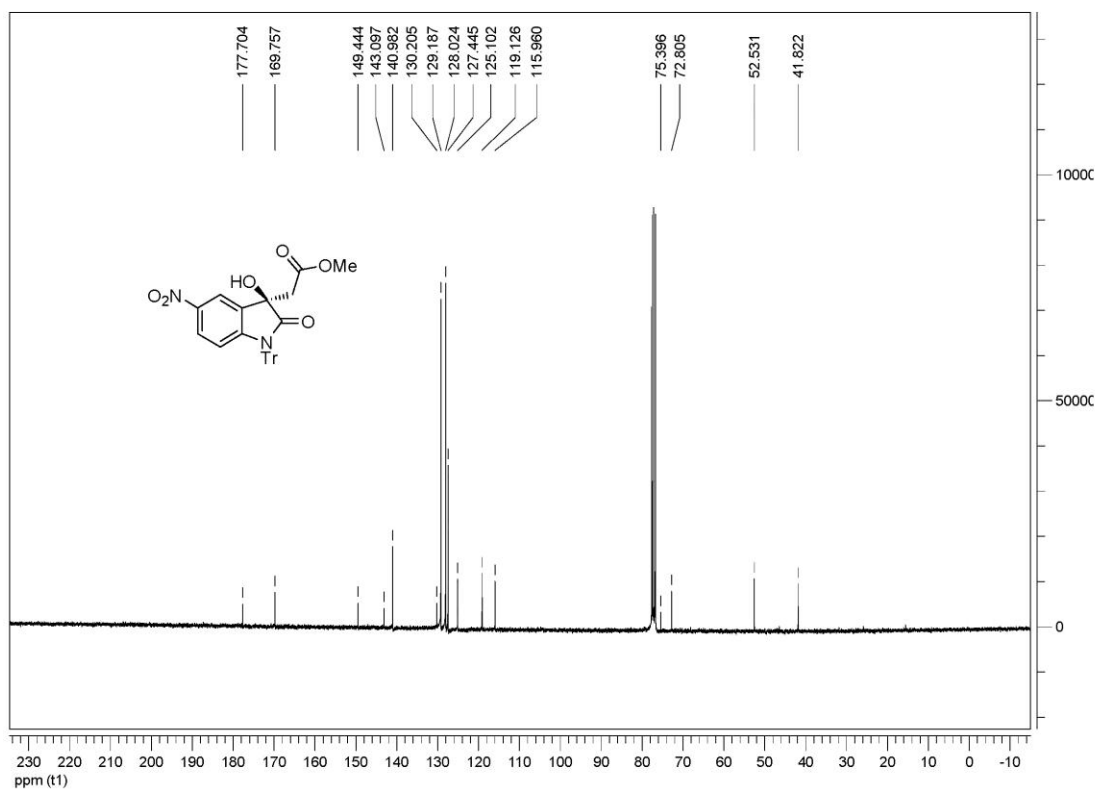

<sup>13</sup>C NMR of **3m**

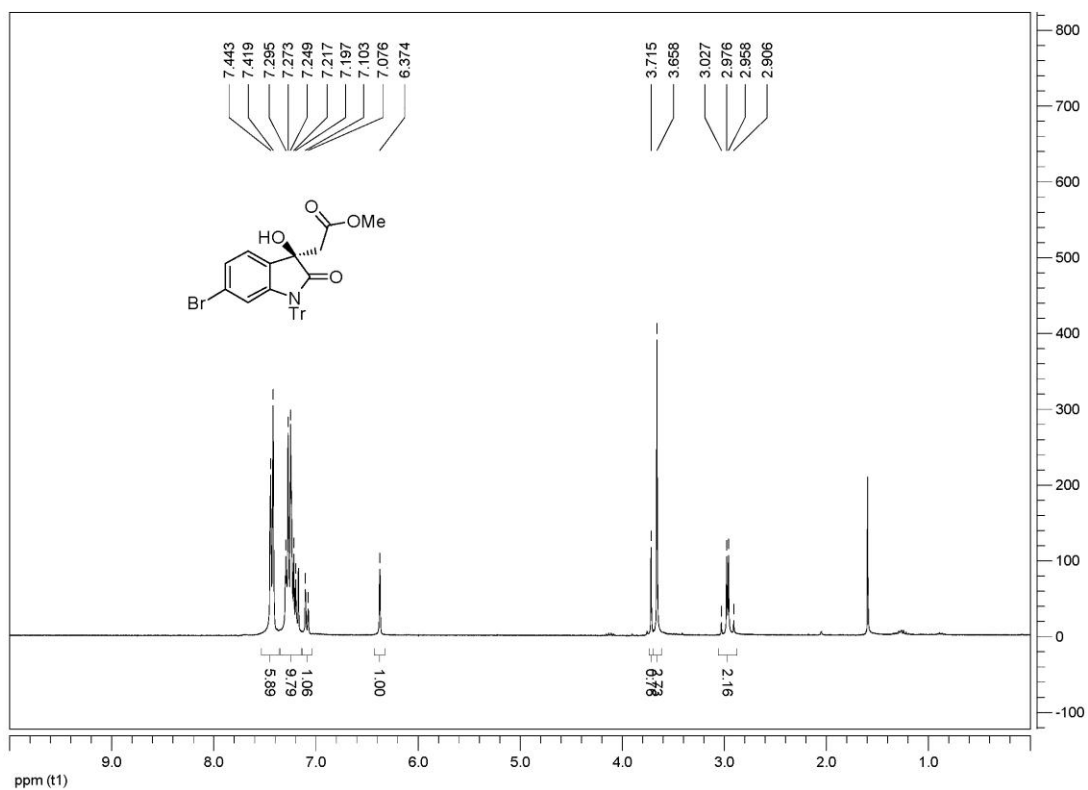

<sup>1</sup>H NMR of **3n**

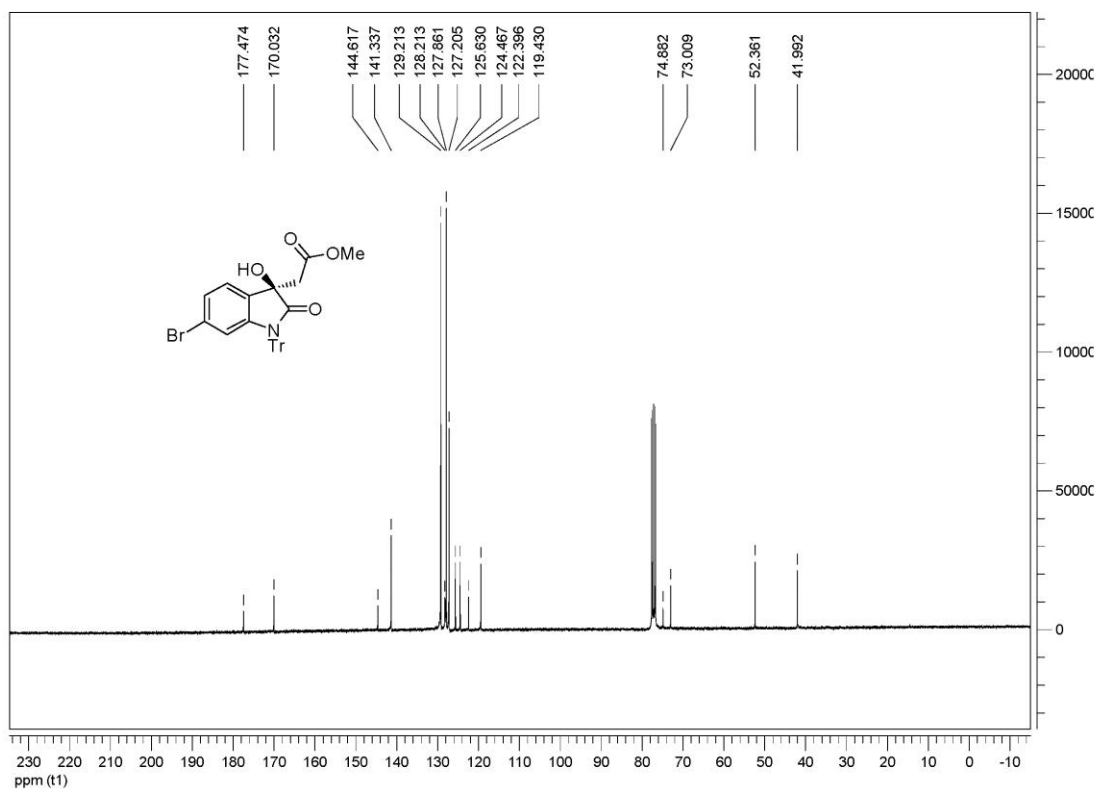

<sup>13</sup>C NMR of **3n**

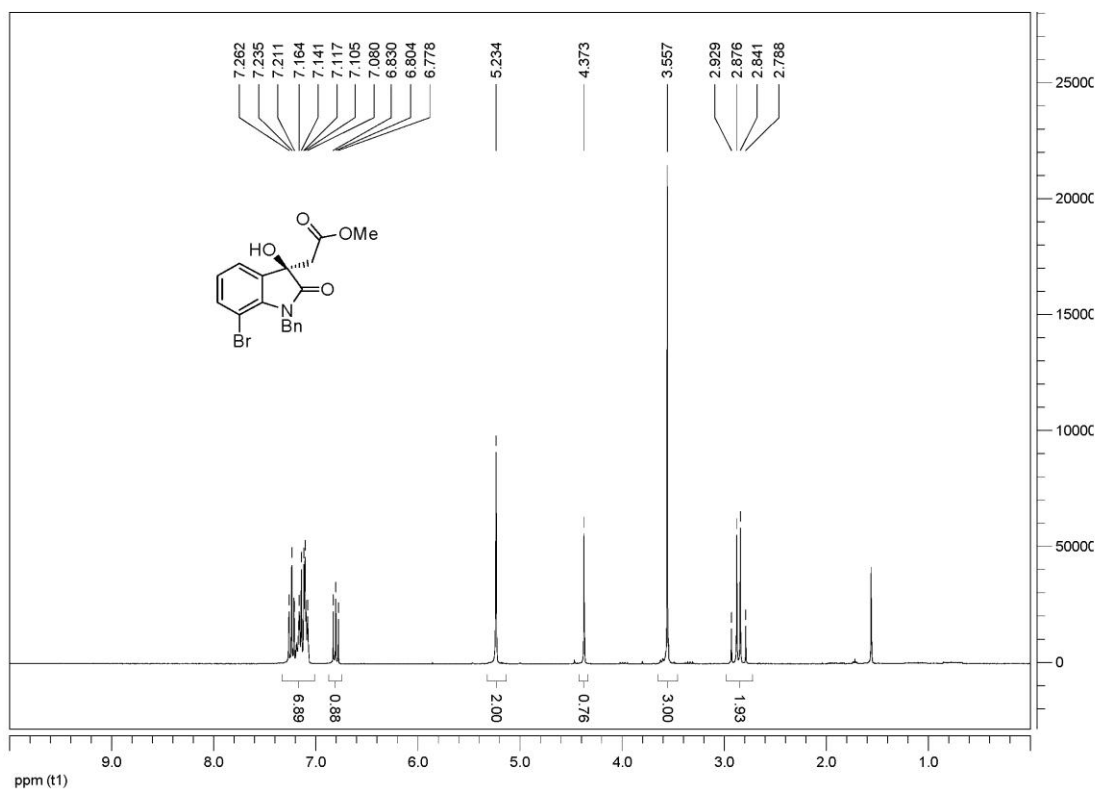

<sup>1</sup>H NMR of **30**

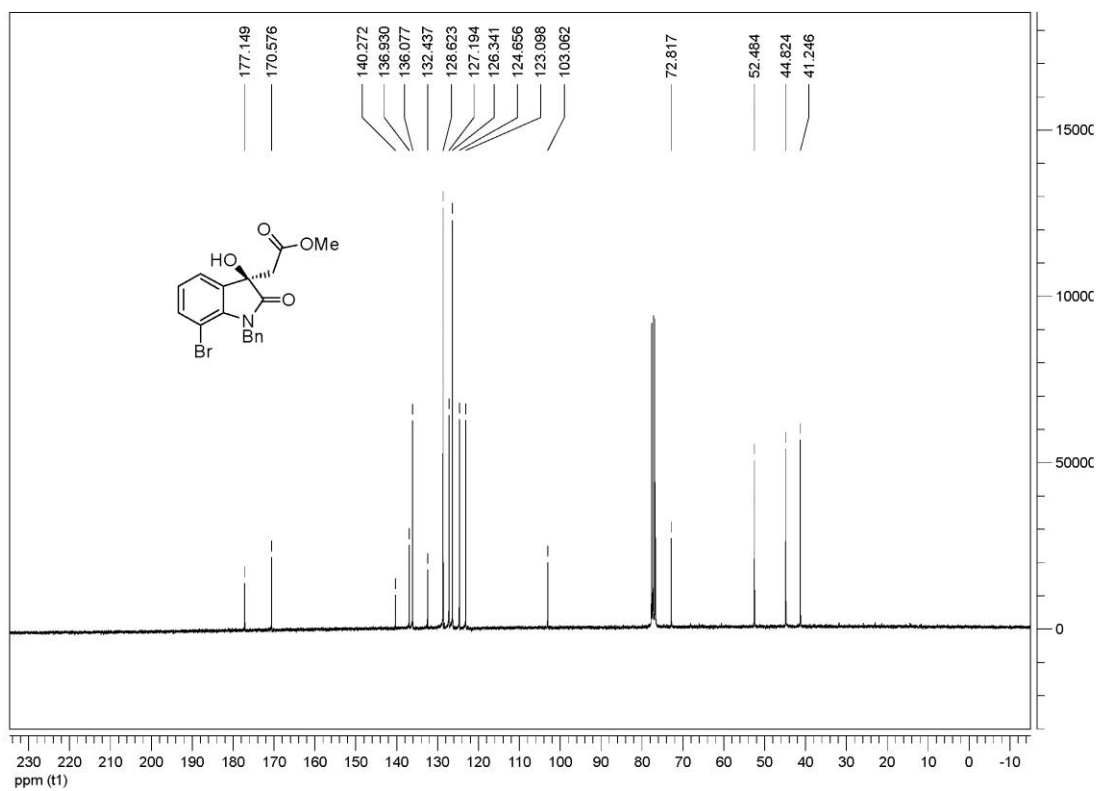

<sup>13</sup>C NMR of **30**

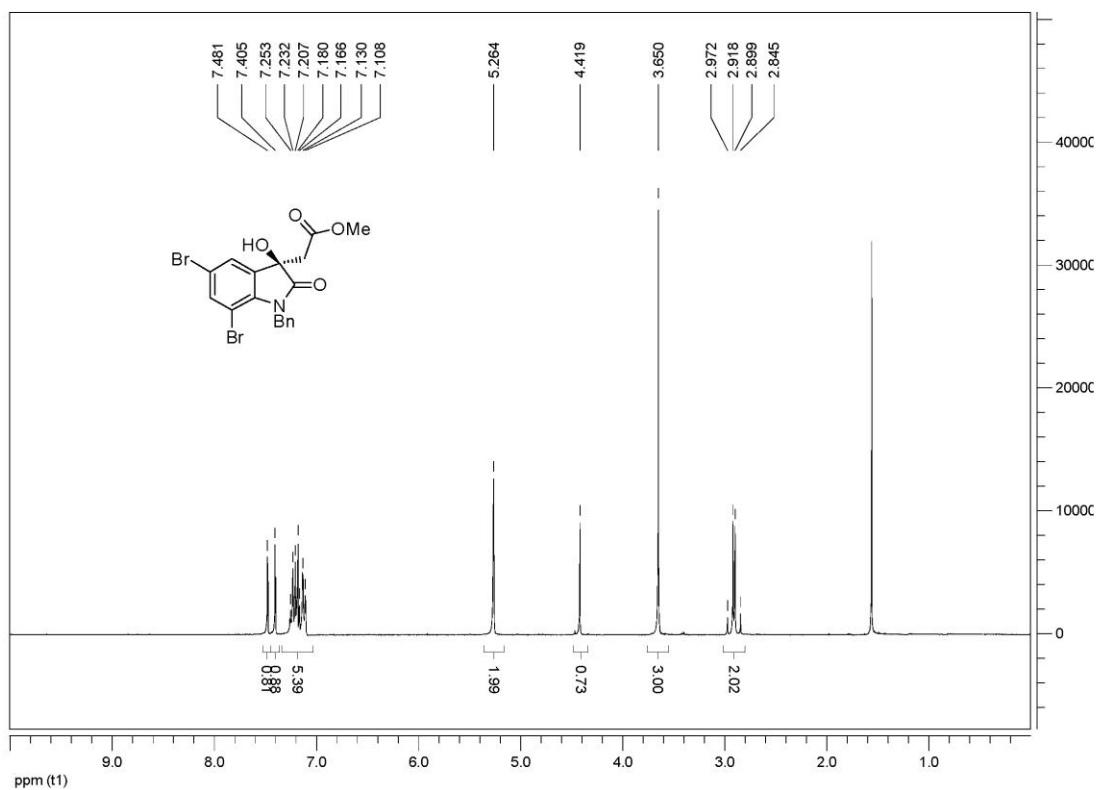

$^1\text{H}$  NMR of **3p**

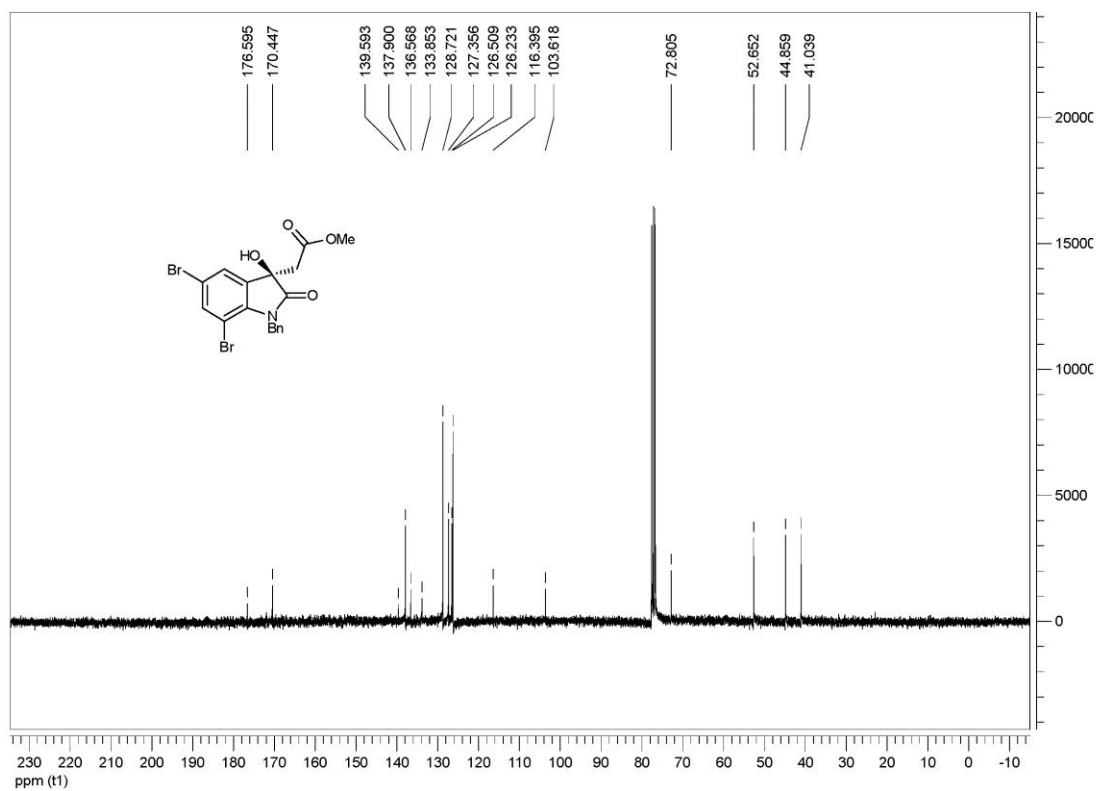

$^{13}\text{C}$  NMR of **3p**

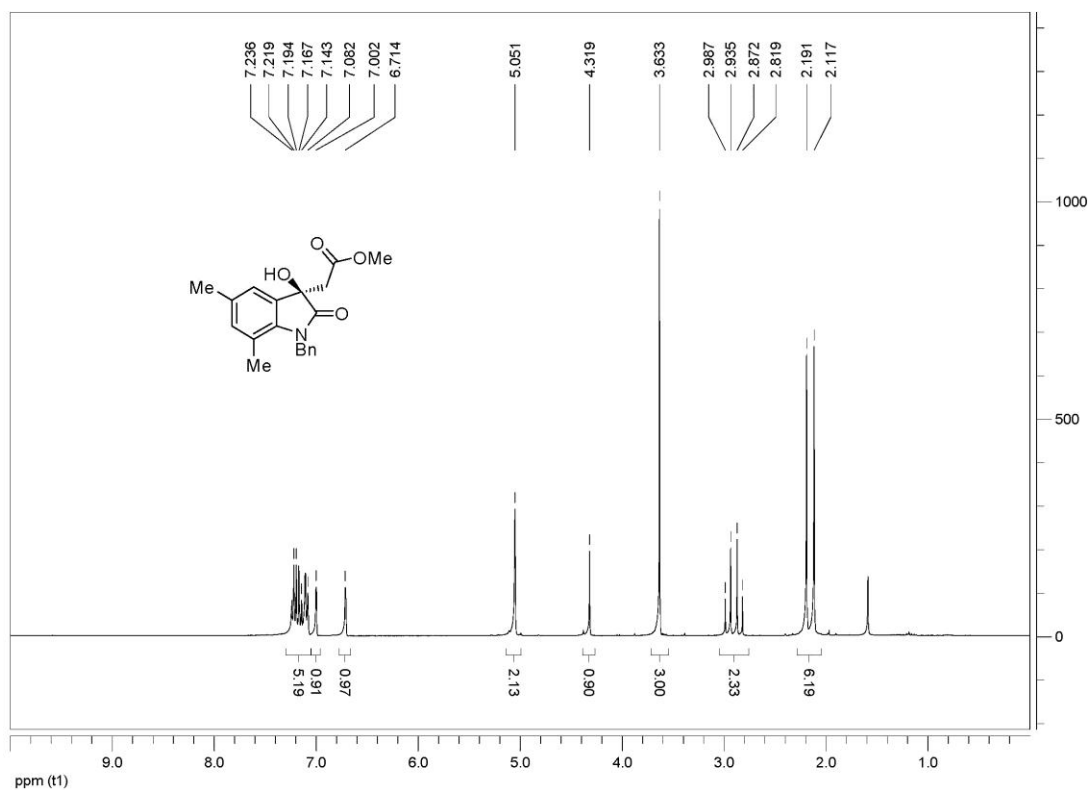

<sup>1</sup>H NMR of **3q**

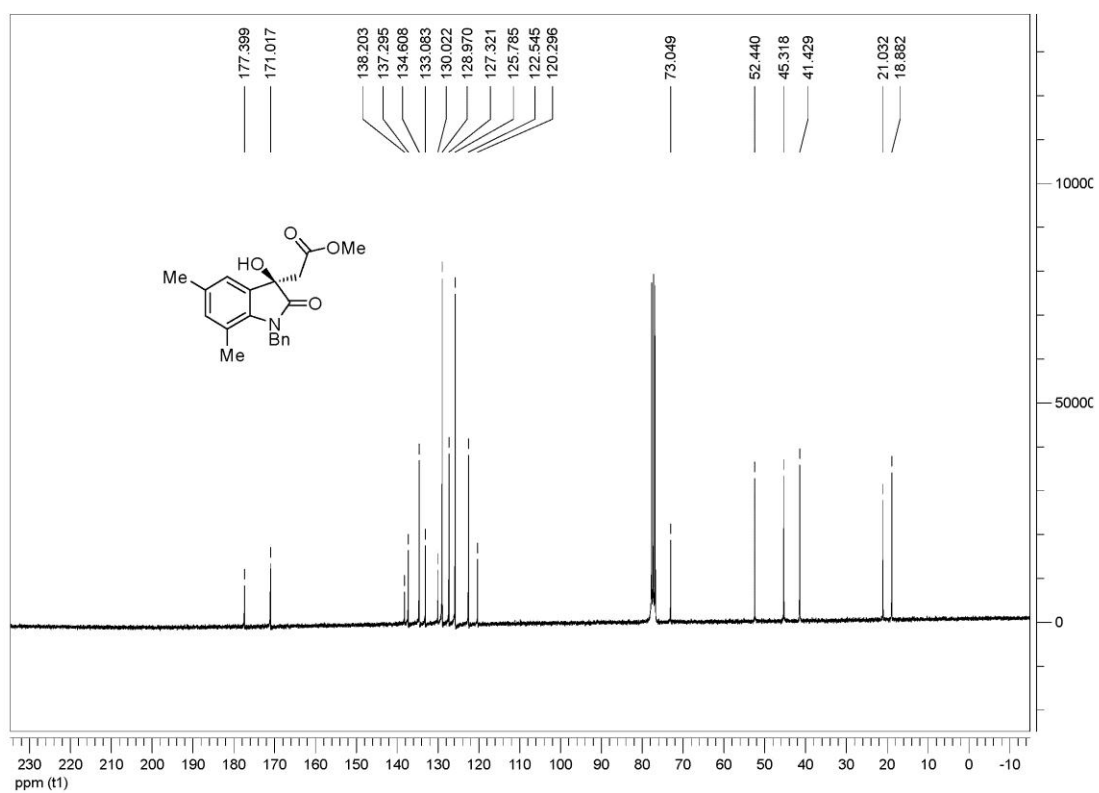

<sup>13</sup>C NMR of **3q**

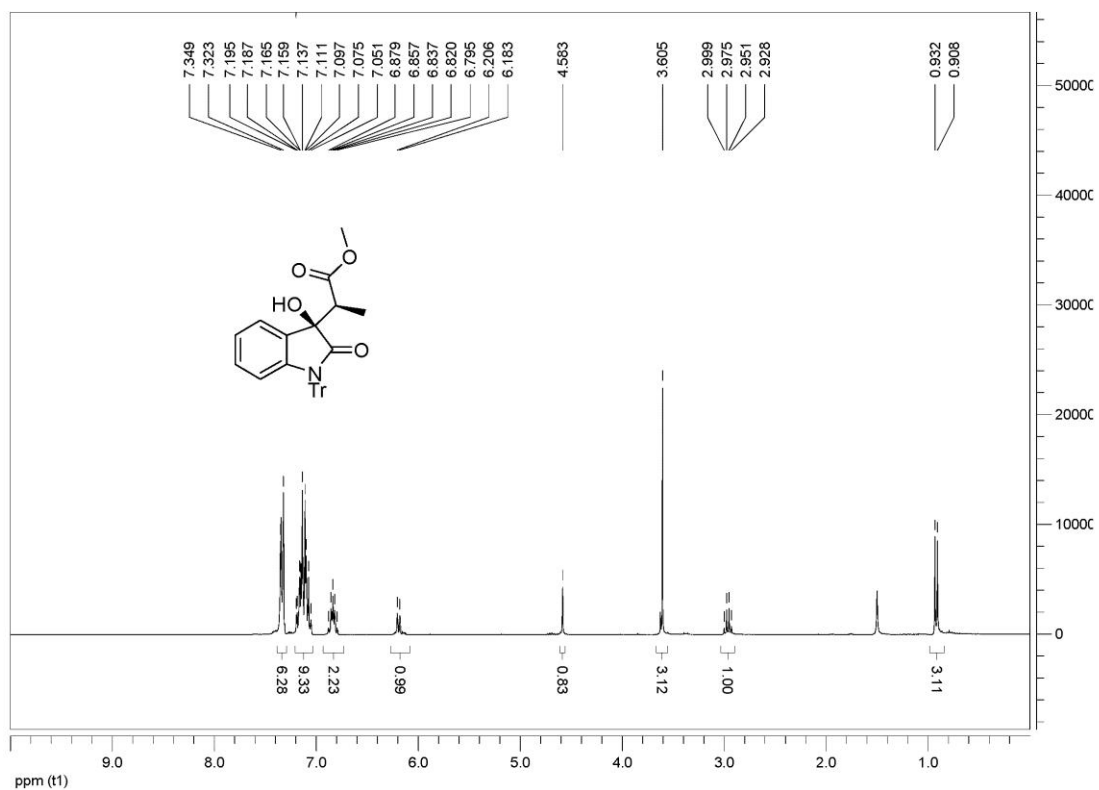

$^1\text{H}$  NMR of **3r**

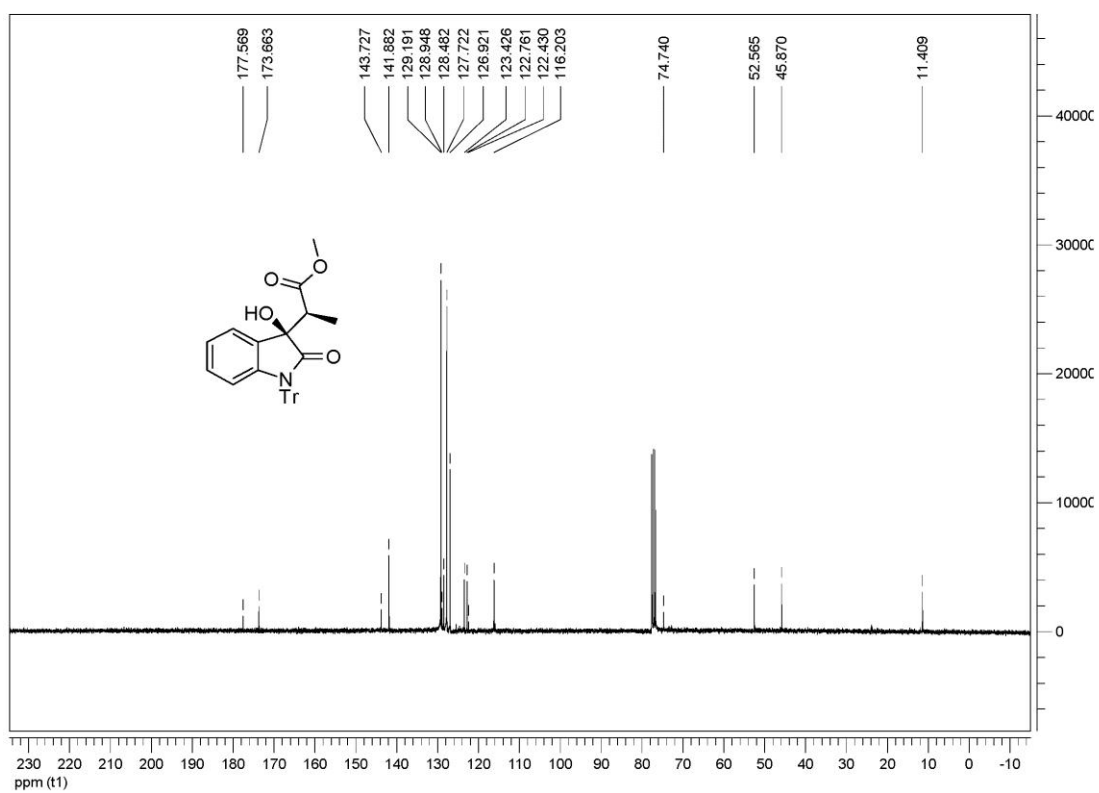

$^{13}\text{C}$  NMR of **3r**



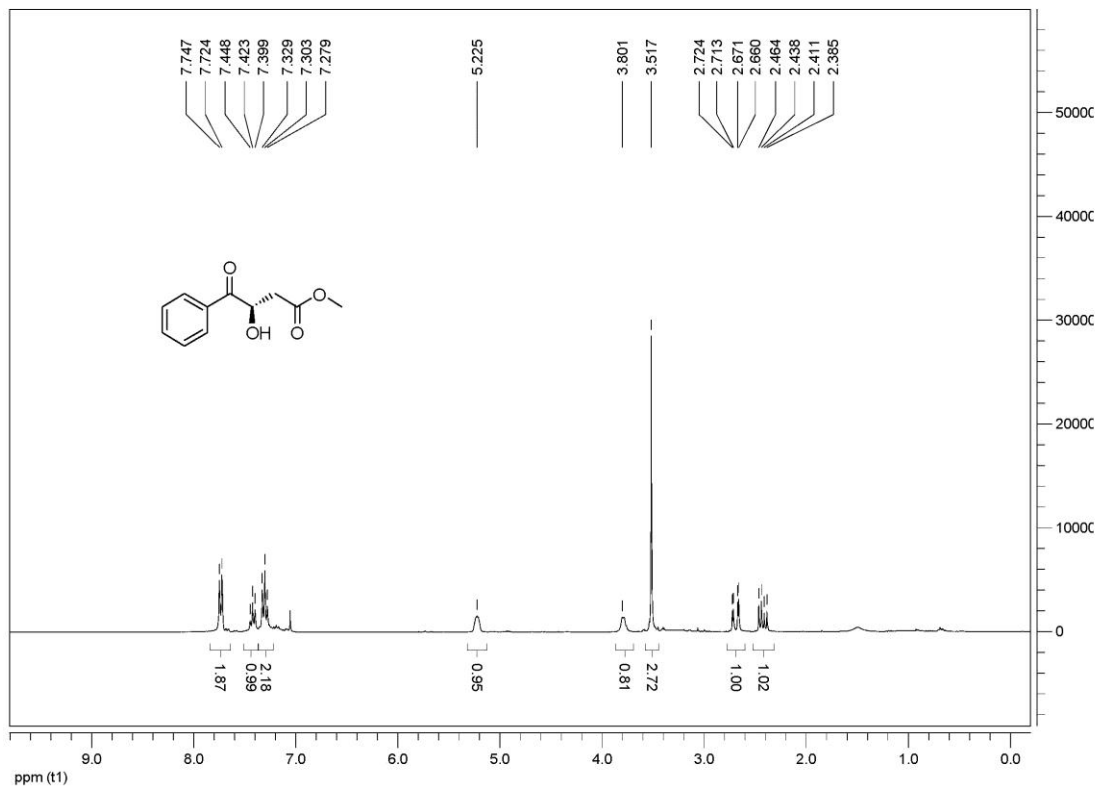

<sup>1</sup>H NMR of 6a

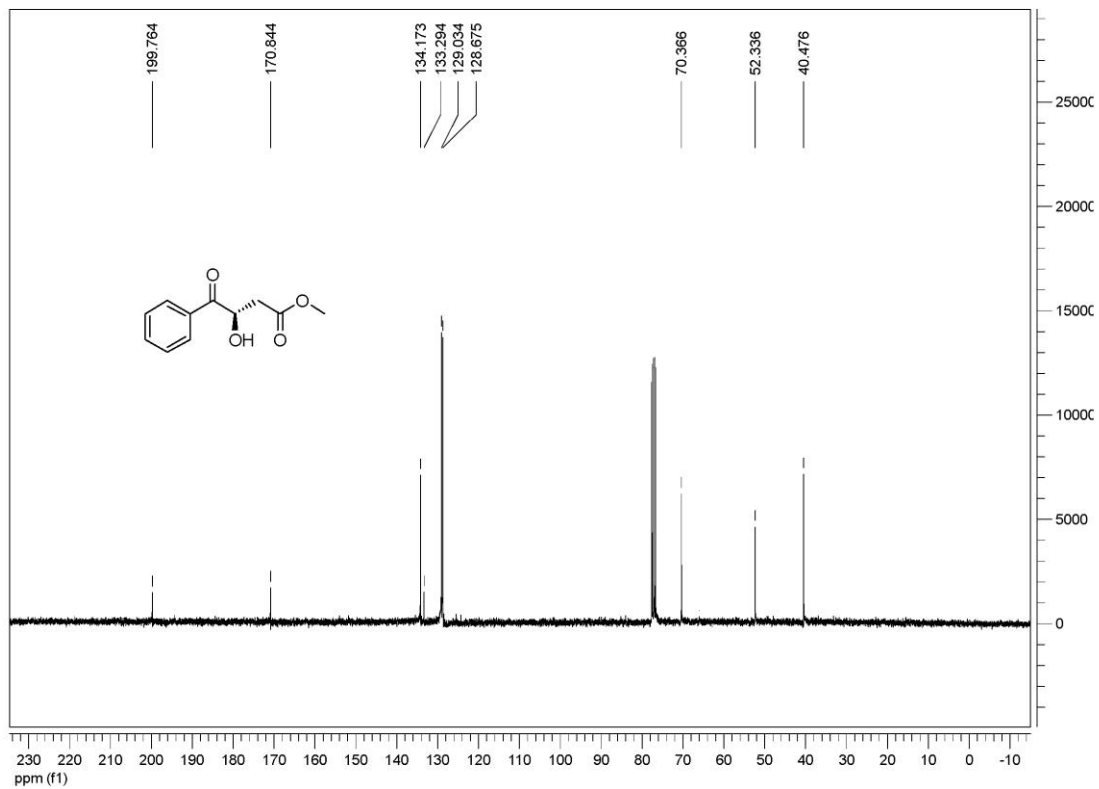

<sup>13</sup>C NMR of 6a

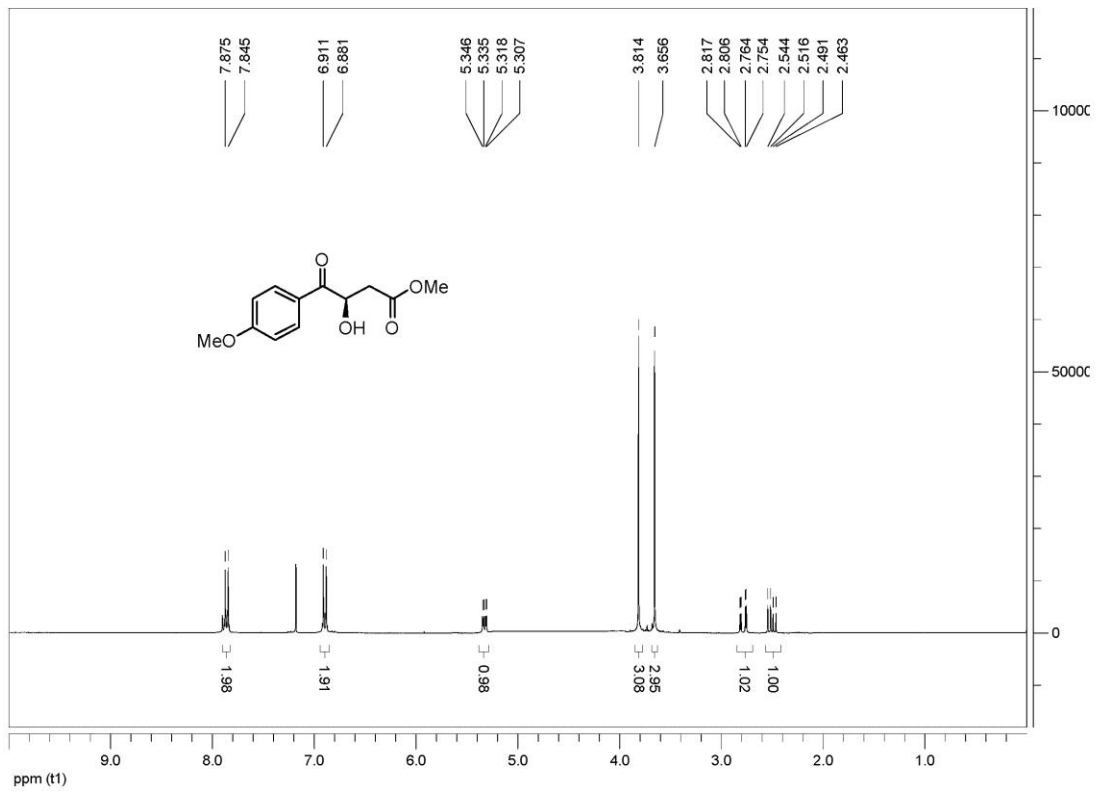

<sup>1</sup>H NMR of **6b**

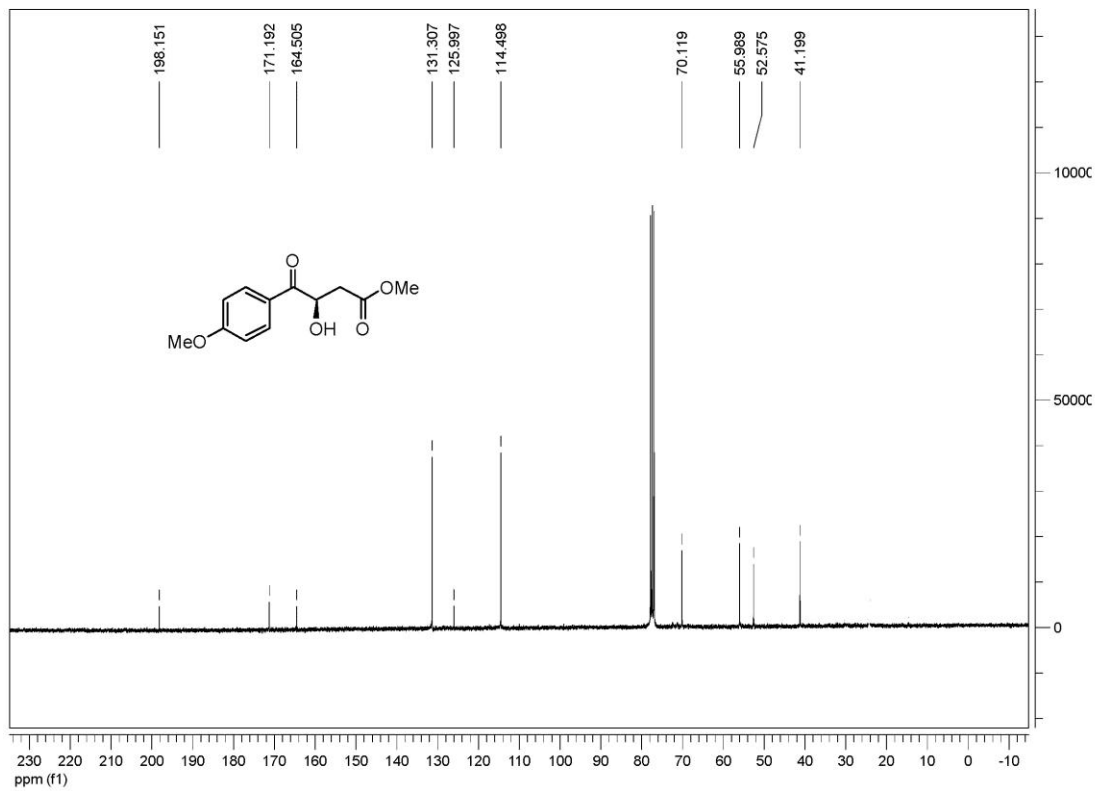

<sup>13</sup>C NMR of **6b**

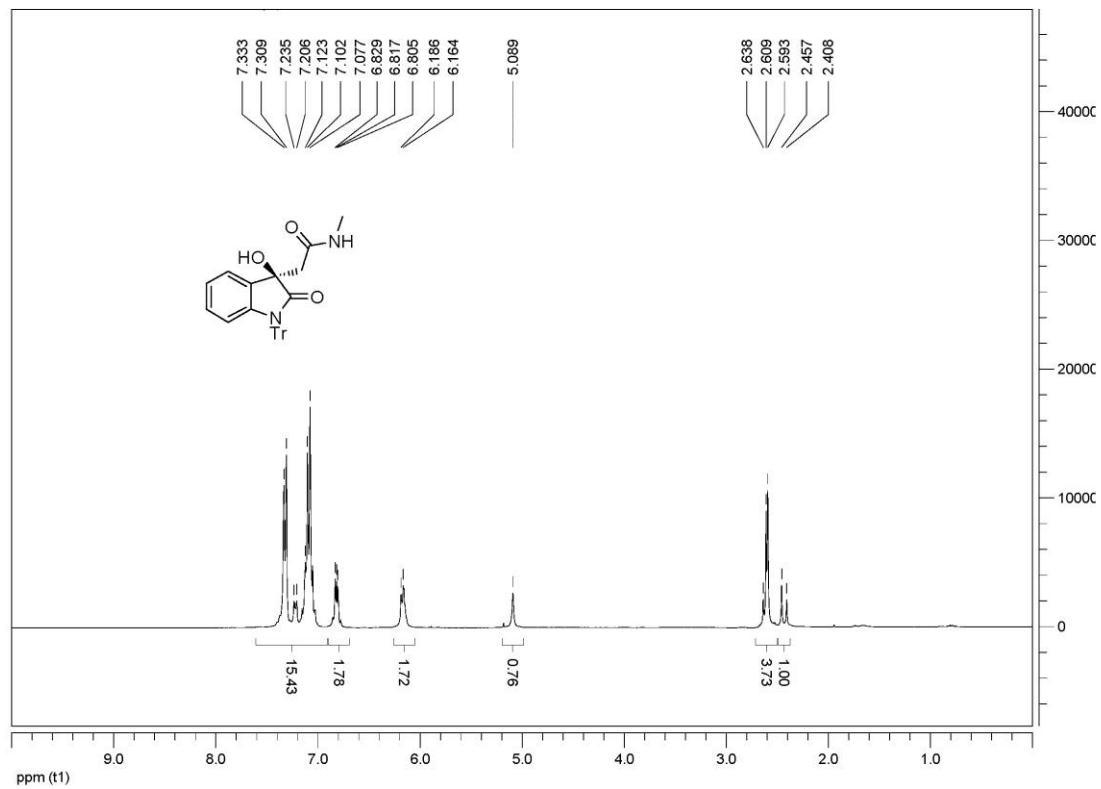

$^1\text{H NMR}$  of 7

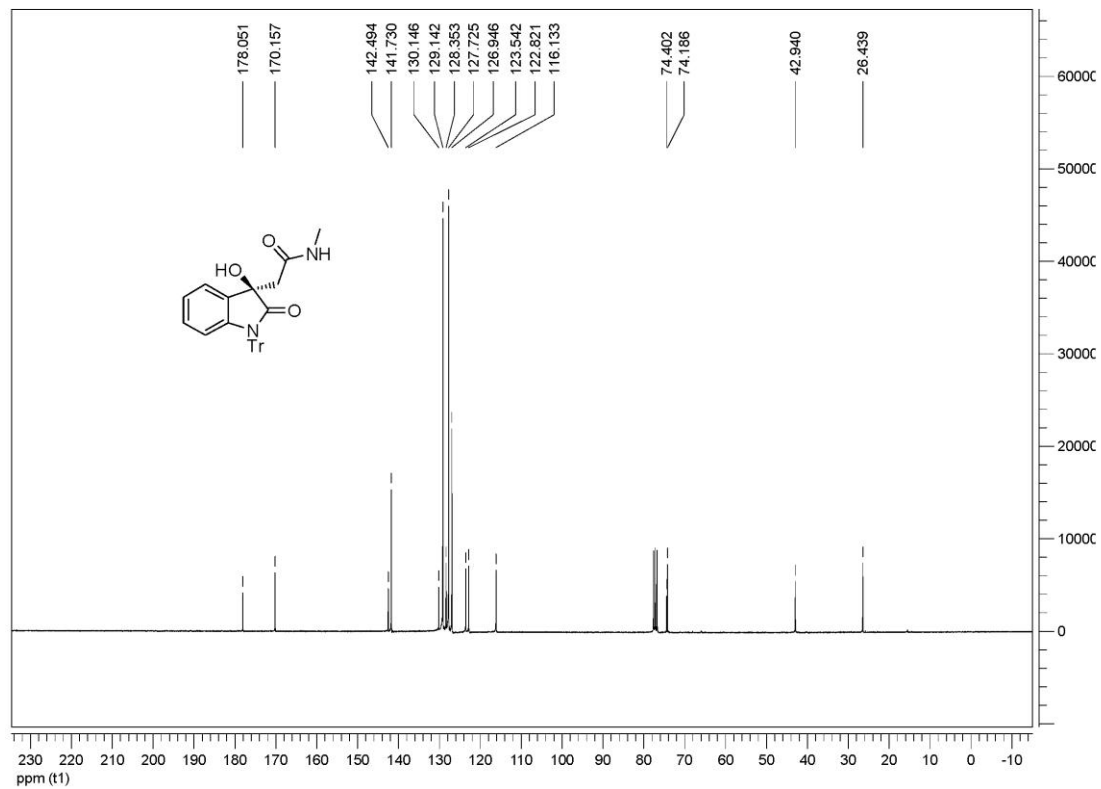

$^{13}\text{C NMR}$  of 7

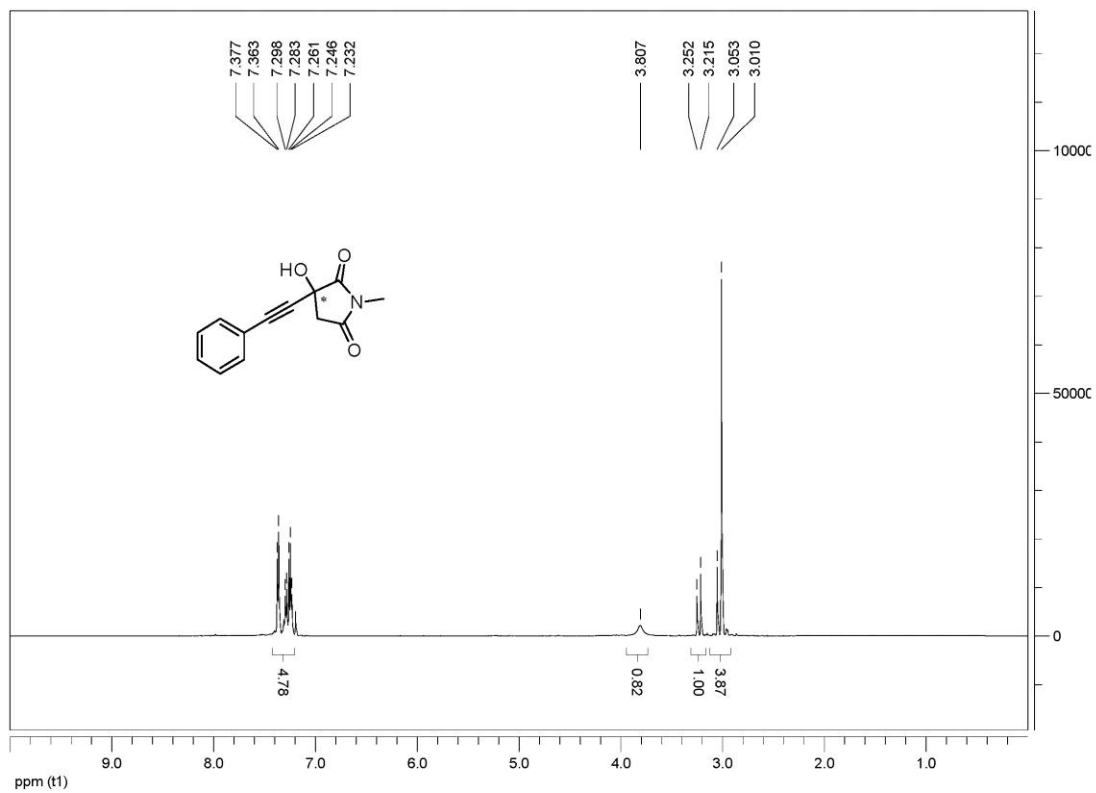

<sup>1</sup>H NMR of **9**

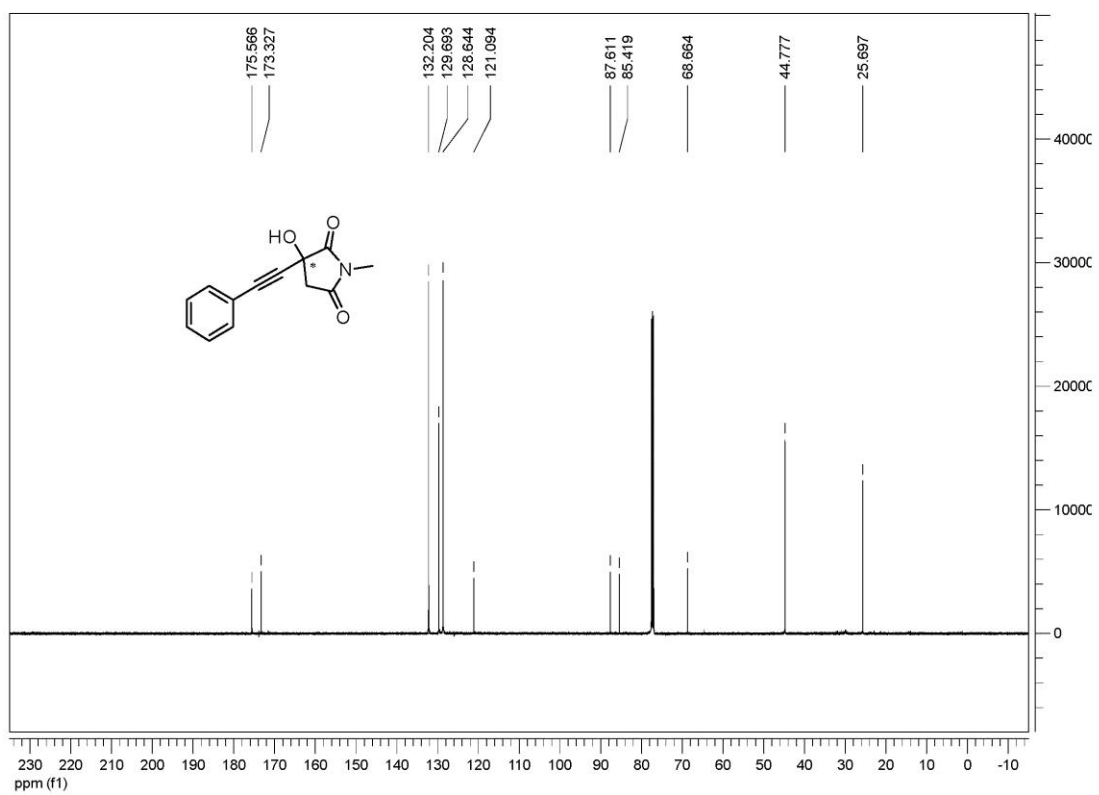

<sup>13</sup>C NMR of **9**

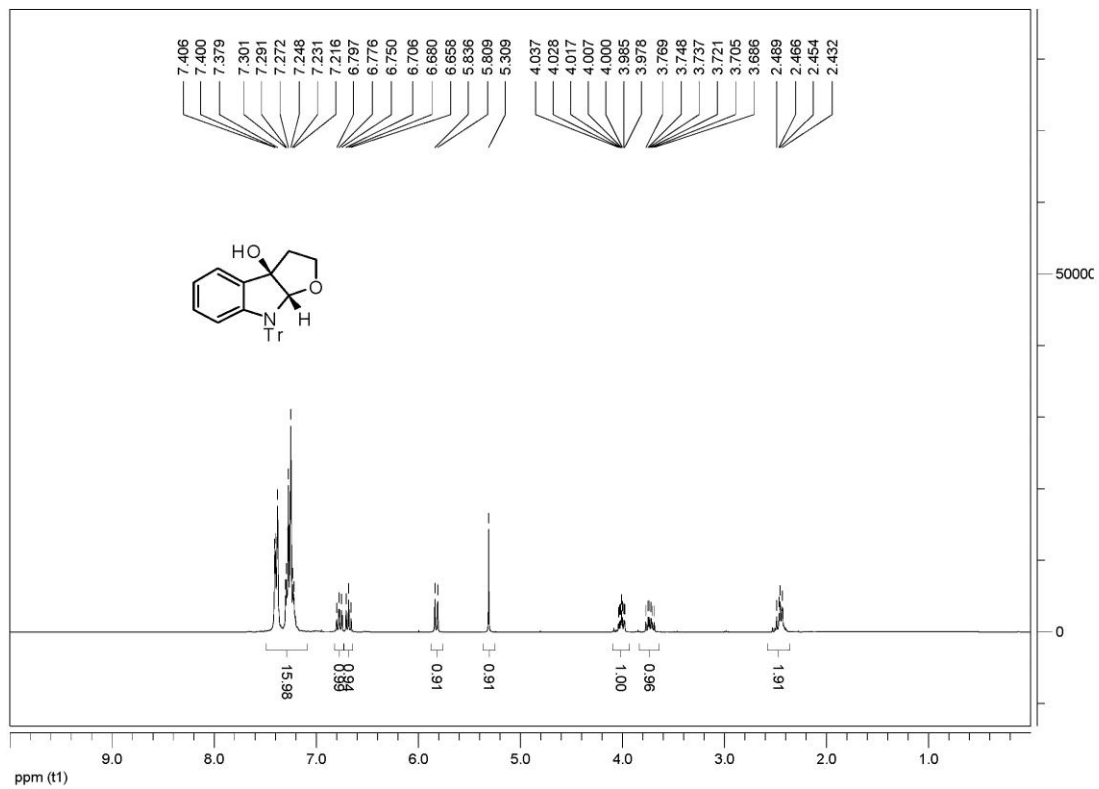

<sup>1</sup>H NMR of **10**

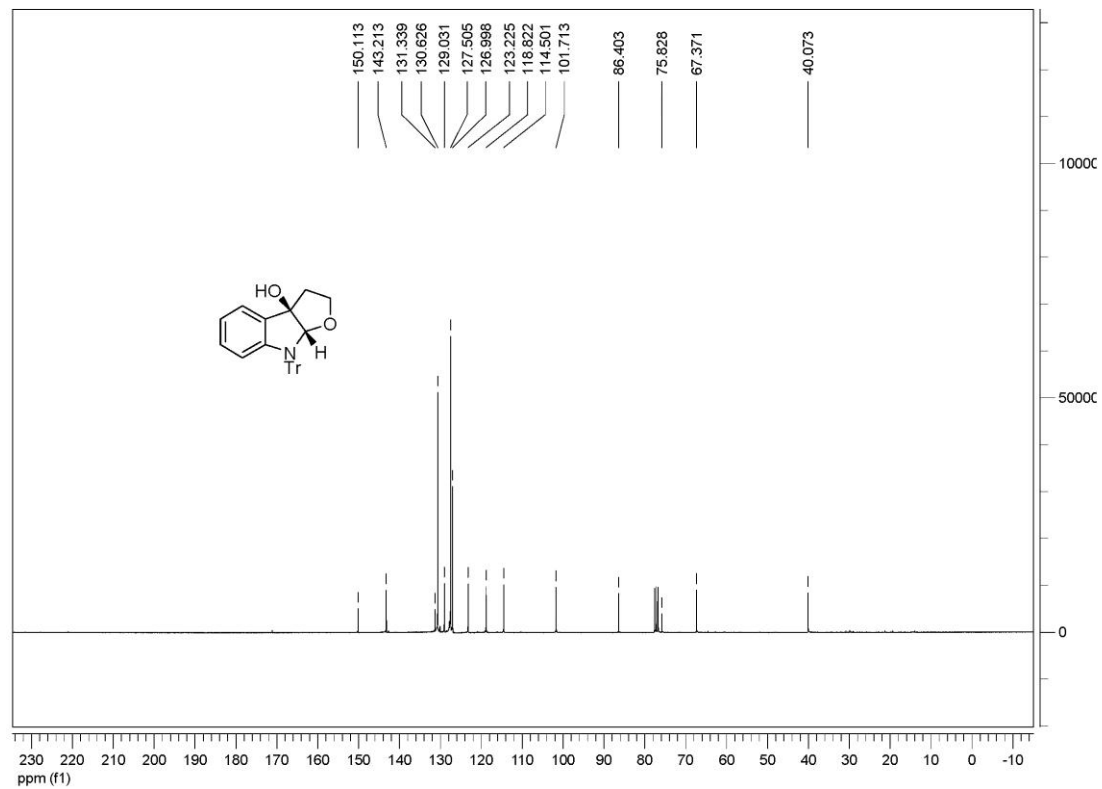

<sup>13</sup>C NMR of **10**

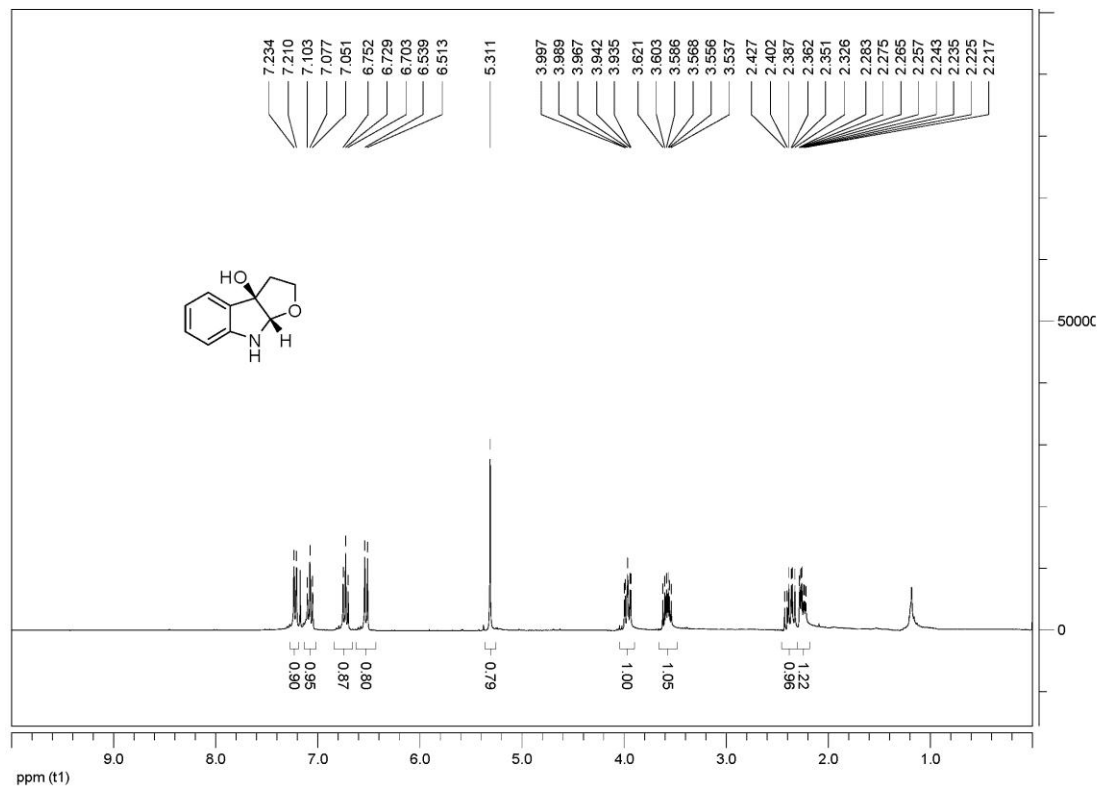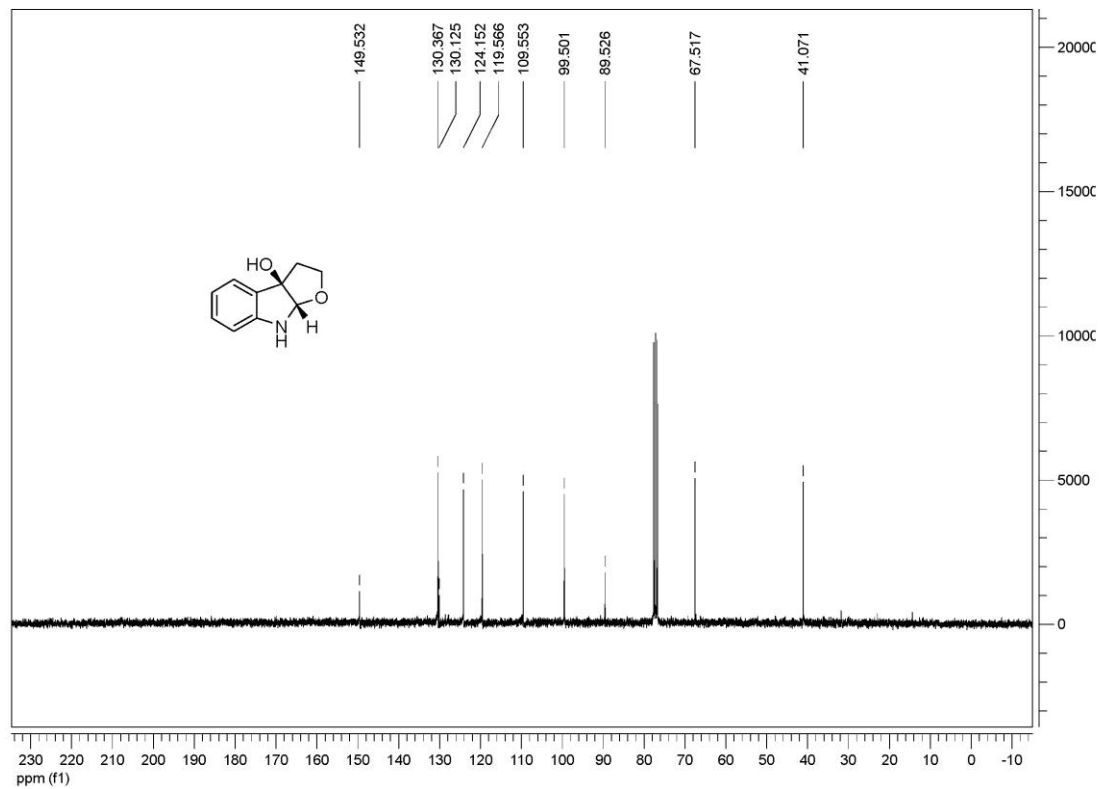

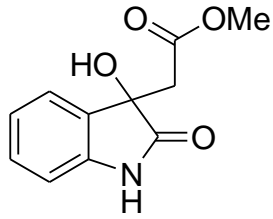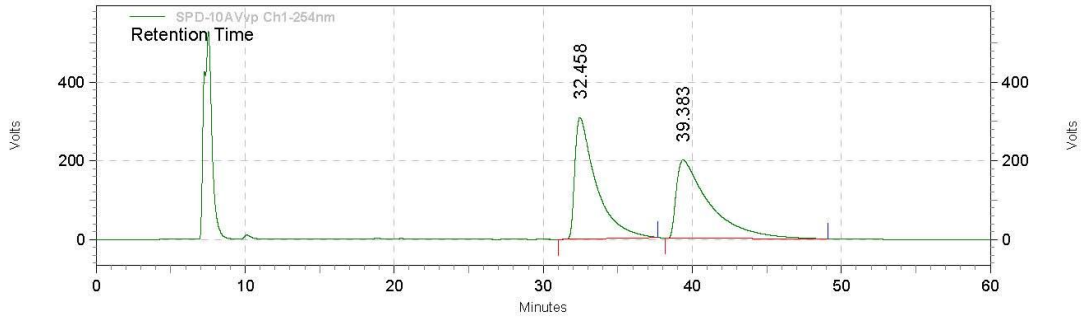

**SPD-10AVvp  
Ch1-254nm  
Results**

| Retention Time | Area     | Area % | Height | Height % |
|----------------|----------|--------|--------|----------|
| 32.458         | 30708247 | 50.10  | 309008 | 60.87    |
| 39.383         | 30590716 | 49.90  | 198621 | 39.13    |
| Totals         | 61298963 | 100.00 | 507629 | 100.00   |

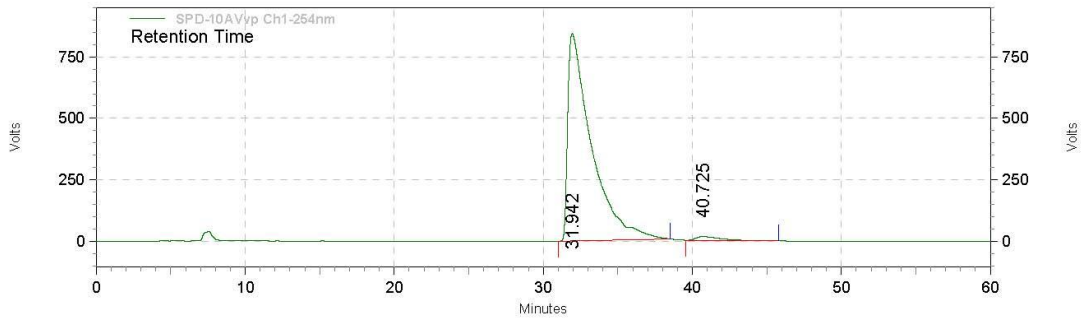

**SPD-10AVvp  
Ch1-254nm  
Results**

| Retention Time | Area     | Area % | Height | Height % |
|----------------|----------|--------|--------|----------|
| 31.942         | 93472424 | 98.16  | 844661 | 98.22    |
| 40.725         | 1752787  | 1.84   | 15274  | 1.78     |
| Totals         | 95225211 | 100.00 | 859935 | 100.00   |

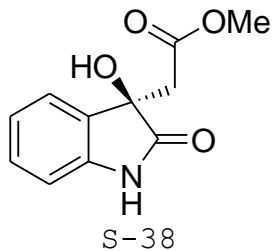

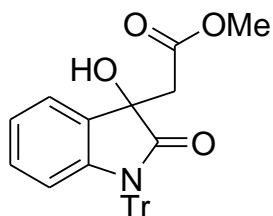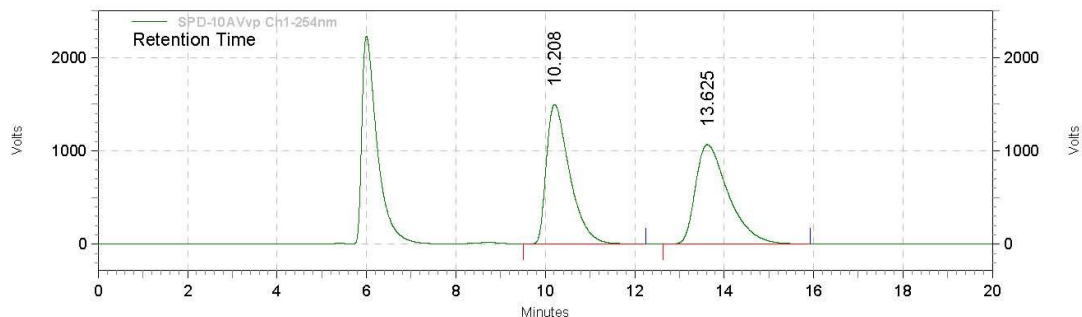

**SPD-10AVvp  
Ch1-254nm  
Results**

| Retention Time | Area      | Area % | Height  | Height % |
|----------------|-----------|--------|---------|----------|
| 10.208         | 53854485  | 49.85  | 1491566 | 58.36    |
| 13.625         | 54168814  | 50.15  | 1064324 | 41.64    |
| Totals         | 108023299 | 100.00 | 2555890 | 100.00   |

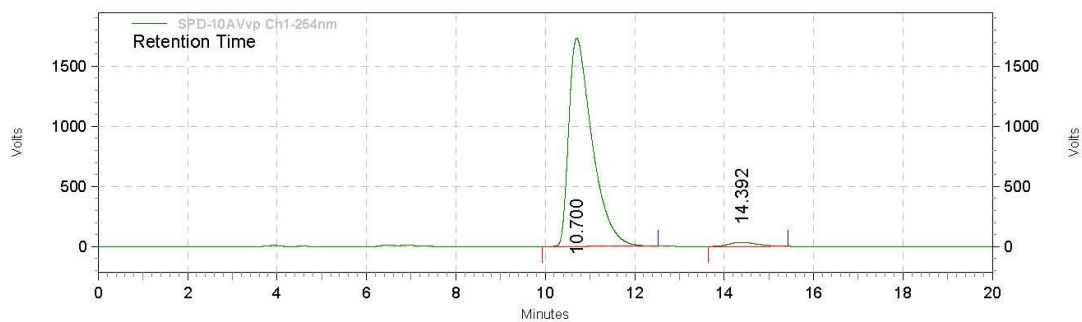

**SPD-10AVvp  
Ch1-254nm  
Results**

| Retention Time | Area     | Area % | Height  | Height % |
|----------------|----------|--------|---------|----------|
| 10.700         | 62695112 | 97.67  | 1728225 | 98.09    |
| 14.392         | 1493375  | 2.33   | 33704   | 1.91     |
| Totals         | 64188487 | 100.00 | 1761929 | 100.00   |

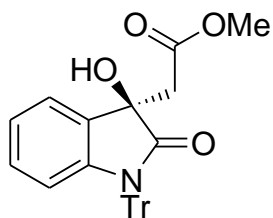



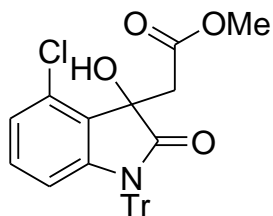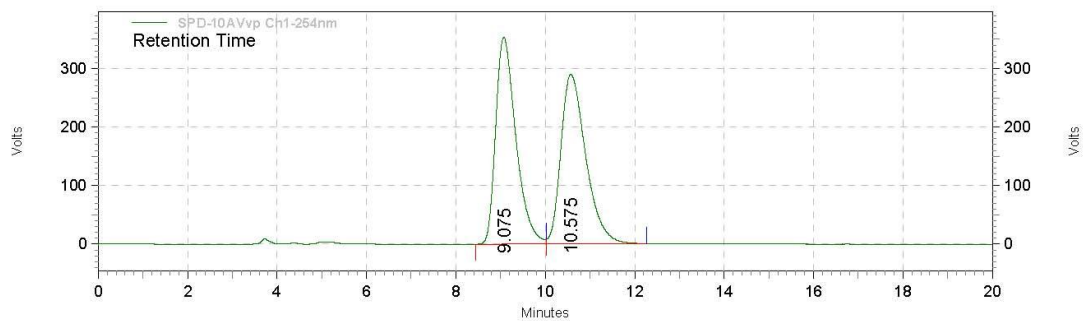

**SPD-10AVvp  
Ch1-254nm  
Results**

| Retention Time | Area     | Area % | Height | Height % |
|----------------|----------|--------|--------|----------|
| 9.075          | 11085686 | 49.76  | 353211 | 54.94    |
| 10.575         | 11192615 | 50.24  | 289671 | 45.06    |
| Totals         | 22278301 | 100.00 | 642882 | 100.00   |

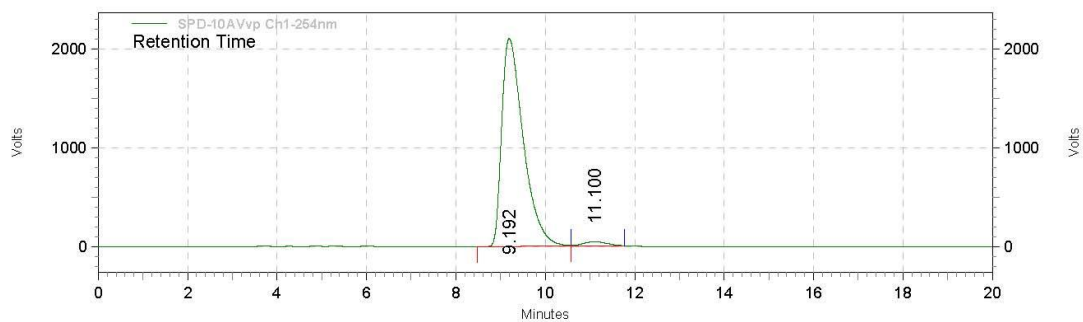

**SPD-10AVvp  
Ch1-254nm  
Results**

| Retention Time | Area     | Area % | Height  | Height % |
|----------------|----------|--------|---------|----------|
| 9.192          | 70555063 | 97.77  | 2103151 | 97.99    |
| 11.100         | 1612300  | 2.23   | 43171   | 2.01     |
| Totals         | 72167363 | 100.00 | 2146322 | 100.00   |

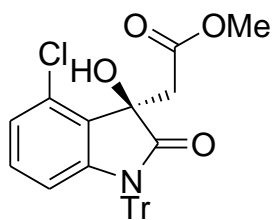

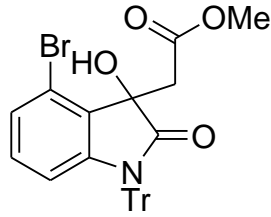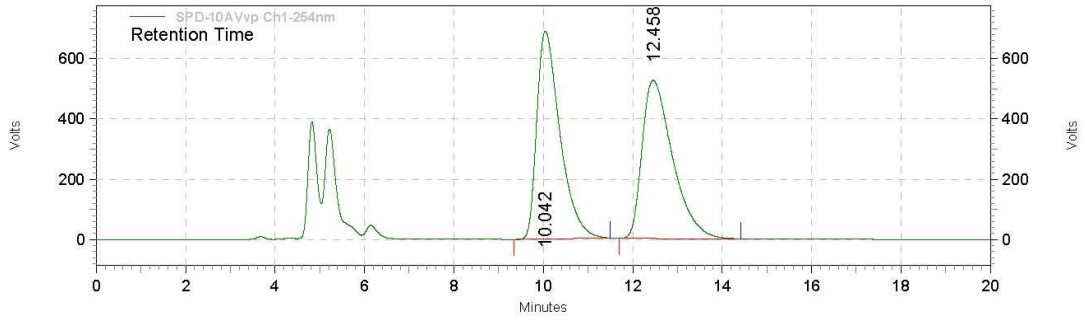

**SPD-10AVvp  
Ch1-254nm  
Results**

| Retention Time | Area     | Area % | Height  | Height % |
|----------------|----------|--------|---------|----------|
| 10.042         | 24842400 | 50.01  | 688034  | 56.72    |
| 12.458         | 24834375 | 49.99  | 525041  | 43.28    |
| Totals         | 49676775 | 100.00 | 1213075 | 100.00   |

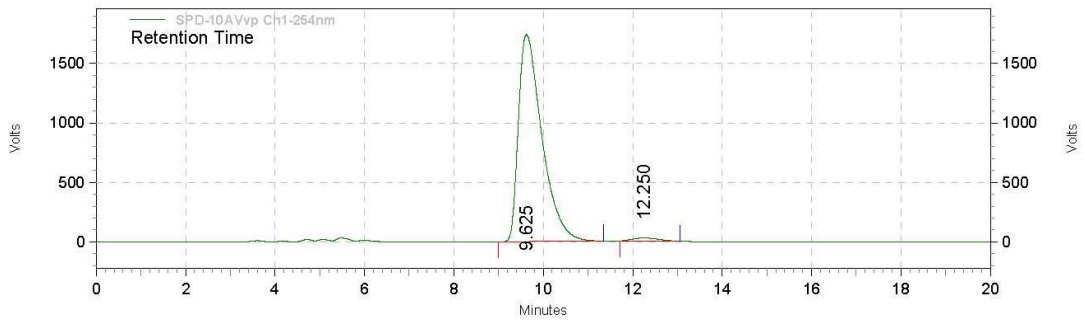

**SPD-10AVvp  
Ch1-254nm  
Results**

| Retention Time | Area     | Area % | Height  | Height % |
|----------------|----------|--------|---------|----------|
| 9.625          | 63499241 | 98.41  | 1742295 | 98.54    |
| 12.250         | 1028100  | 1.59   | 25731   | 1.46     |
| Totals         | 64527341 | 100.00 | 1768026 | 100.00   |

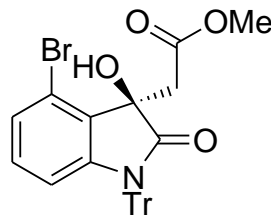

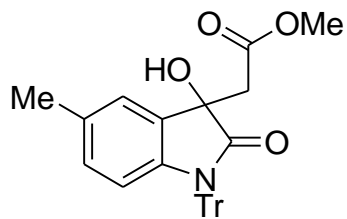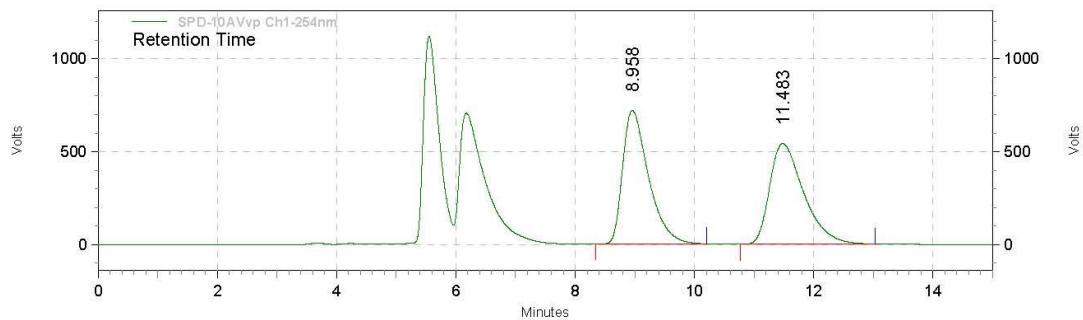

**SPD-10AVvp  
Ch1-254nm  
Results**

| Retention Time | Area     | Area % | Height  | Height % |
|----------------|----------|--------|---------|----------|
| 8.958          | 21568065 | 50.03  | 718351  | 56.98    |
| 11.483         | 21541515 | 49.97  | 542249  | 43.02    |
| Totals         | 43109580 | 100.00 | 1260600 | 100.00   |

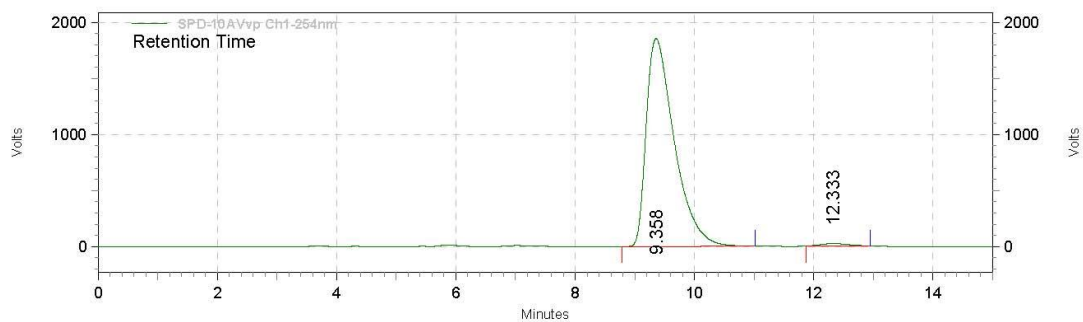

**SPD-10AVvp  
Ch1-254nm  
Results**

| Retention Time | Area     | Area % | Height  | Height % |
|----------------|----------|--------|---------|----------|
| 9.358          | 60674602 | 98.81  | 1855875 | 98.86    |
| 12.333         | 727665   | 1.19   | 21408   | 1.14     |
| Totals         | 61402267 | 100.00 | 1877283 | 100.00   |

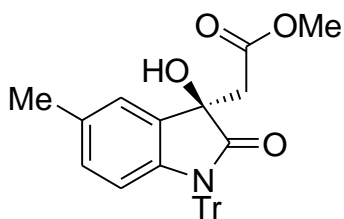

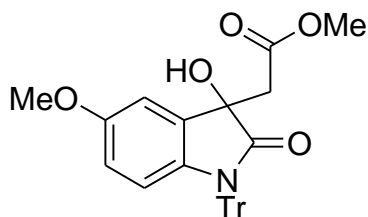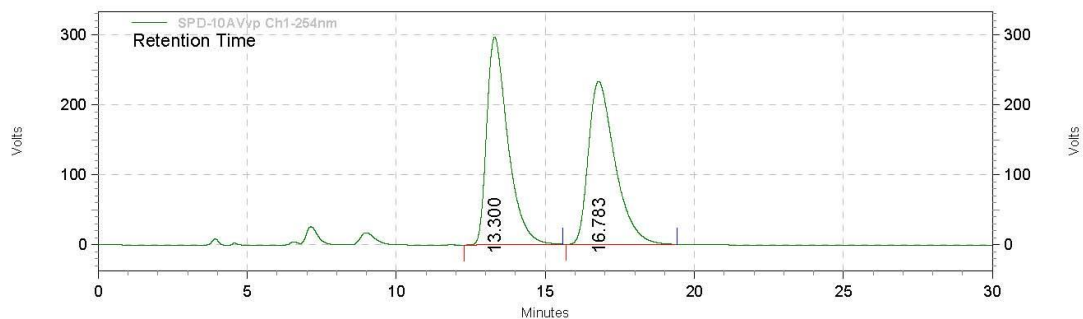

**SPD-10AVvp  
Ch1-254nm  
Results**

| Retention Time | Area     | Area % | Height | Height % |
|----------------|----------|--------|--------|----------|
| 13.300         | 14632028 | 50.36  | 296318 | 55.99    |
| 16.783         | 14421834 | 49.64  | 232920 | 44.01    |
| Totals         | 29053862 | 100.00 | 529238 | 100.00   |

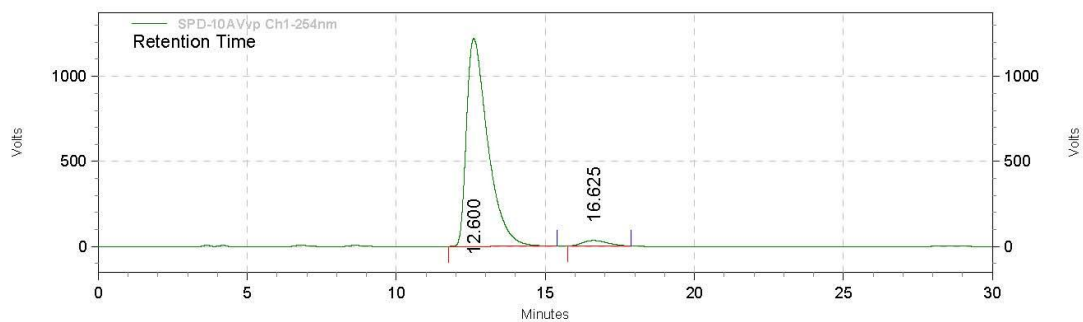

**SPD-10AVvp  
Ch1-254nm  
Results**

| Retention Time | Area     | Area % | Height  | Height % |
|----------------|----------|--------|---------|----------|
| 12.600         | 60603245 | 96.94  | 1221430 | 97.42    |
| 16.625         | 1913704  | 3.06   | 32332   | 2.58     |
| Totals         | 62516949 | 100.00 | 1253762 | 100.00   |

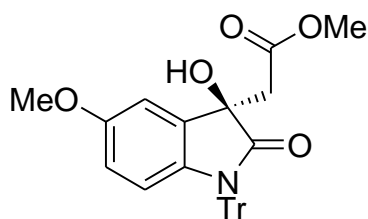

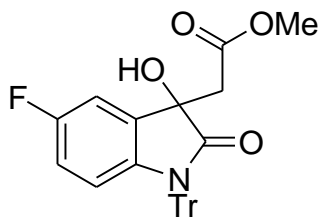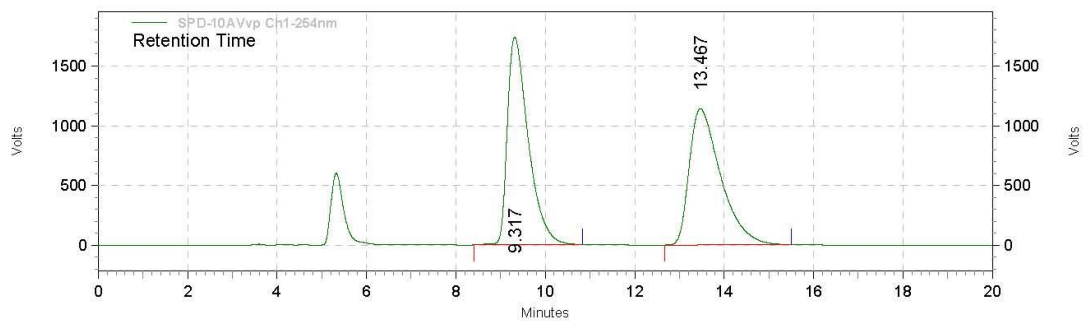

**SPD-10AVvp  
Ch1-254nm  
Results**

| Retention Time | Area      | Area % | Height  | Height % |
|----------------|-----------|--------|---------|----------|
| 9.317          | 56569833  | 50.42  | 1736617 | 60.38    |
| 13.467         | 55636275  | 49.58  | 1139353 | 39.62    |
| Totals         | 112206108 | 100.00 | 2875970 | 100.00   |

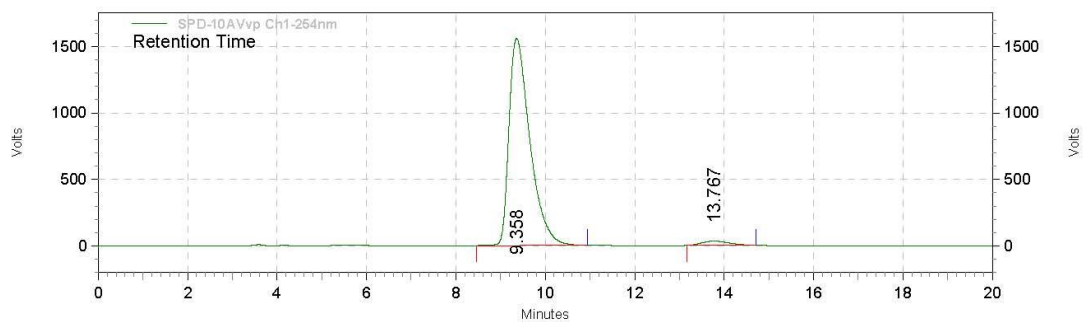

**SPD-10AVvp  
Ch1-254nm  
Results**

| Retention Time | Area     | Area % | Height  | Height % |
|----------------|----------|--------|---------|----------|
| 9.358          | 50576134 | 97.30  | 1557013 | 97.95    |
| 13.767         | 1404781  | 2.70   | 32564   | 2.05     |
| Totals         | 51980915 | 100.00 | 1589577 | 100.00   |

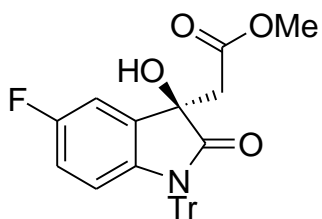

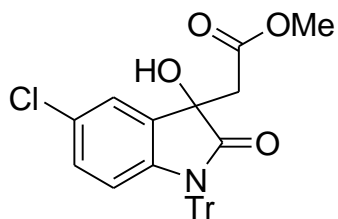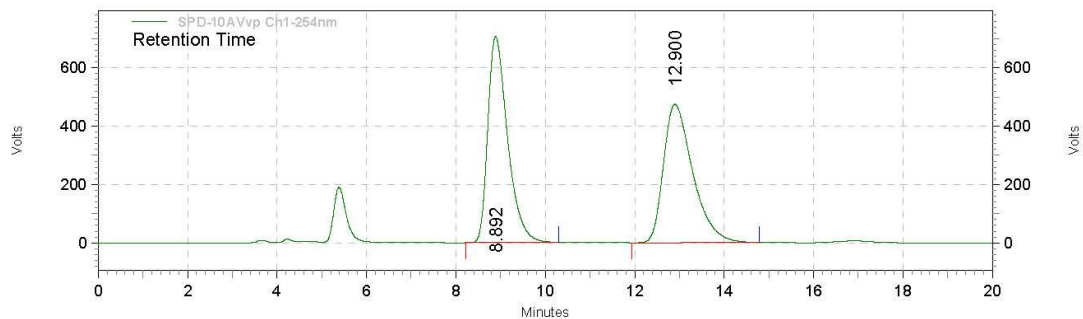

**SPD-10AVvp  
Ch1-254nm  
Results**

| Retention Time | Area     | Area % | Height  | Height % |
|----------------|----------|--------|---------|----------|
| 8.892          | 21615768 | 50.08  | 706123  | 59.83    |
| 12.900         | 21550640 | 49.92  | 474053  | 40.17    |
| Totals         | 43166408 | 100.00 | 1180176 | 100.00   |

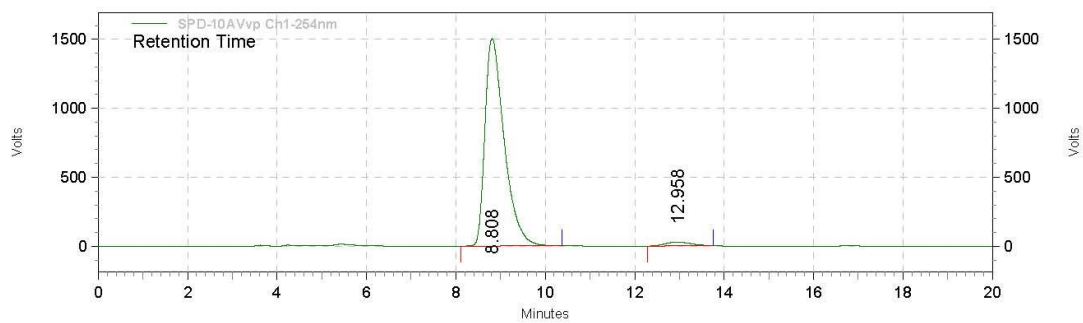

**SPD-10AVvp  
Ch1-254nm  
Results**

| Retention Time | Area     | Area % | Height  | Height % |
|----------------|----------|--------|---------|----------|
| 8.808          | 44988300 | 97.57  | 1505994 | 98.17    |
| 12.958         | 1119924  | 2.43   | 28006   | 1.83     |
| Totals         | 46108224 | 100.00 | 1534000 | 100.00   |

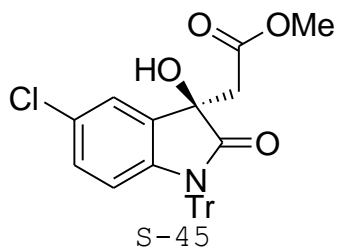

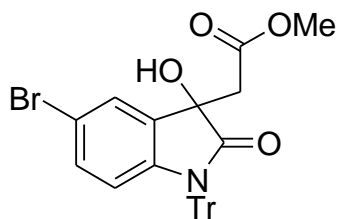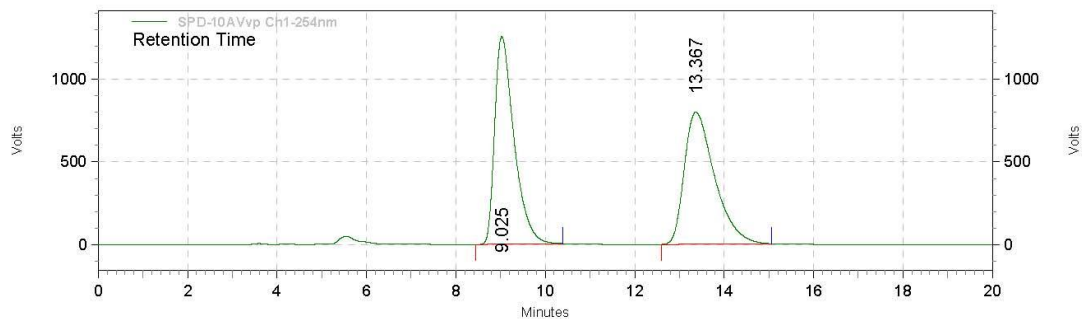

**SPD-10AVvp  
Ch1-254nm  
Results**

| Retention Time | Area     | Area % | Height  | Height % |
|----------------|----------|--------|---------|----------|
| 9.025          | 37750398 | 50.03  | 1256751 | 61.09    |
| 13.367         | 37698967 | 49.97  | 800601  | 38.91    |
| Totals         | 75449365 | 100.00 | 2057352 | 100.00   |

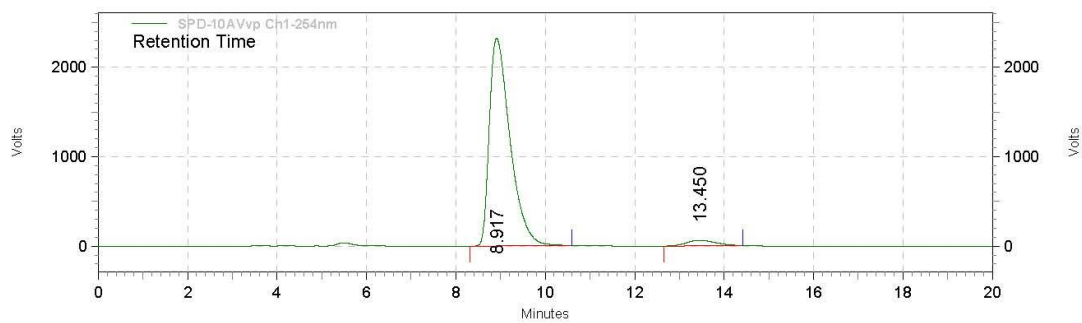

**SPD-10AVvp  
Ch1-254nm  
Results**

| Retention Time | Area     | Area % | Height  | Height % |
|----------------|----------|--------|---------|----------|
| 8.917          | 74562993 | 96.37  | 2320387 | 97.39    |
| 13.450         | 2809969  | 3.63   | 62096   | 2.61     |
| Totals         | 77372962 | 100.00 | 2382483 | 100.00   |

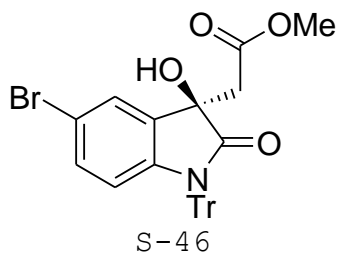

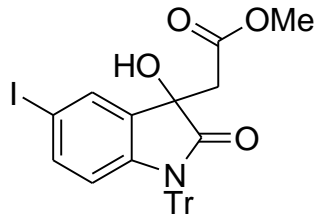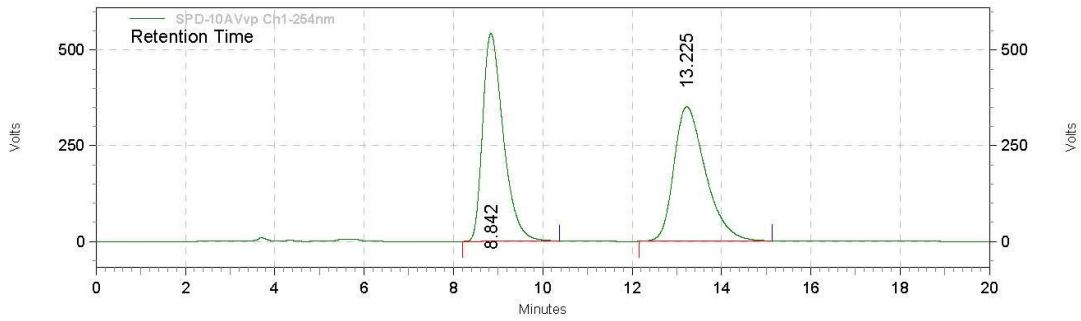

**SPD-10AVvp  
Ch1-254nm  
Results**

| Retention Time | Area     | Area % | Height | Height % |
|----------------|----------|--------|--------|----------|
| 8.842          | 17385204 | 50.12  | 542624 | 60.71    |
| 13.225         | 17298523 | 49.88  | 351157 | 39.29    |
| Totals         | 34683727 | 100.00 | 893781 | 100.00   |

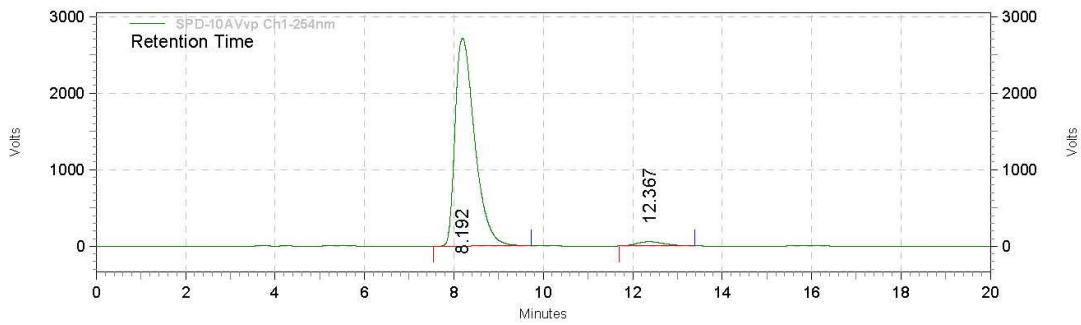

**SPD-10AVvp  
Ch1-254nm  
Results**

| Retention Time | Area     | Area % | Height  | Height % |
|----------------|----------|--------|---------|----------|
| 8.192          | 82426461 | 97.18  | 2711745 | 97.97    |
| 12.367         | 2389971  | 2.82   | 56097   | 2.03     |
| Totals         | 84816432 | 100.00 | 2767842 | 100.00   |

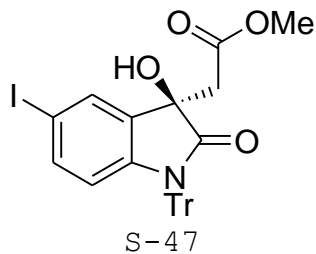



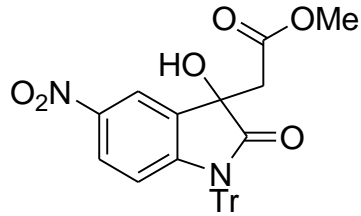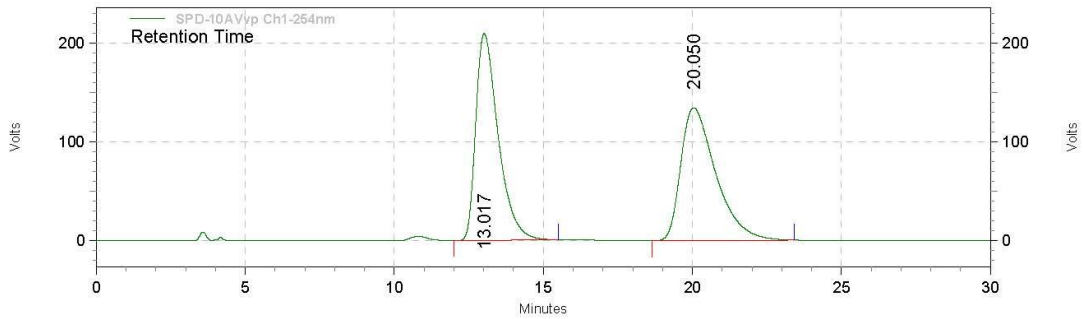

**SPD-10AVvp  
Ch1-254nm  
Results**

| Retention Time | Area     | Area % | Height | Height % |
|----------------|----------|--------|--------|----------|
| 13.017         | 10959181 | 49.96  | 209649 | 60.90    |
| 20.050         | 10978224 | 50.04  | 134611 | 39.10    |
| Totals         | 21937405 | 100.00 | 344260 | 100.00   |

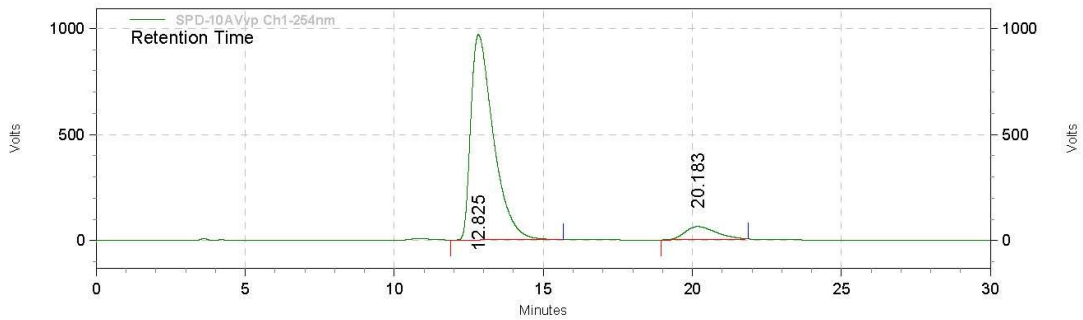

**SPD-10AVvp  
Ch1-254nm  
Results**

| Retention Time | Area     | Area % | Height  | Height % |
|----------------|----------|--------|---------|----------|
| 12.825         | 50921746 | 91.96  | 969074  | 94.07    |
| 20.183         | 4453589  | 8.04   | 61110   | 5.93     |
| Totals         | 55375335 | 100.00 | 1030184 | 100.00   |

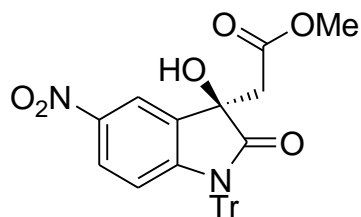

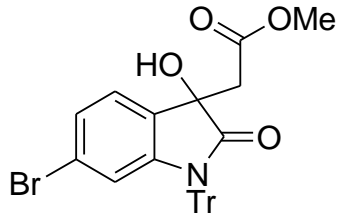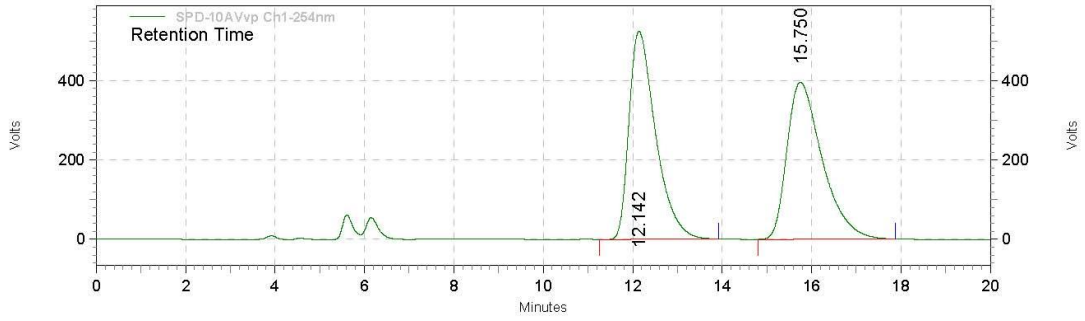

**SPD-10AVvp  
Ch1-254nm  
Results**

| Retention Time | Area     | Area % | Height | Height % |
|----------------|----------|--------|--------|----------|
| 12.142         | 21664266 | 49.97  | 524088 | 56.94    |
| 15.750         | 21688044 | 50.03  | 396261 | 43.06    |
| Totals         | 43352310 | 100.00 | 920349 | 100.00   |

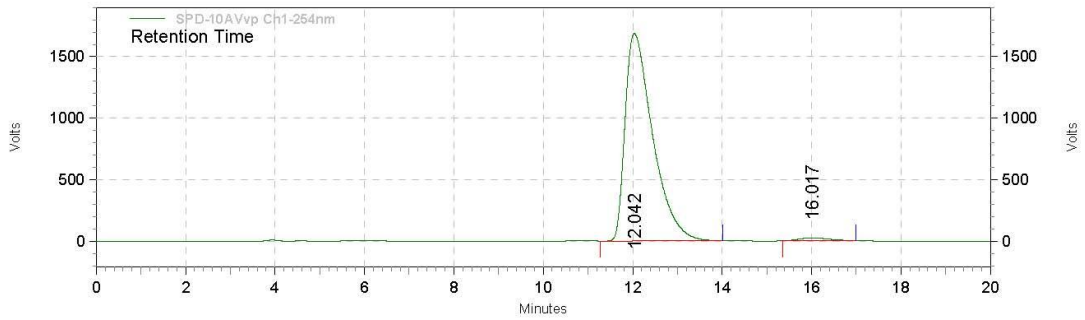

**SPD-10AVvp  
Ch1-254nm  
Results**

| Retention Time | Area     | Area % | Height  | Height % |
|----------------|----------|--------|---------|----------|
| 12.042         | 72208595 | 98.50  | 1688011 | 98.66    |
| 16.017         | 1096059  | 1.50   | 22955   | 1.34     |
| Totals         | 73304654 | 100.00 | 1710966 | 100.00   |

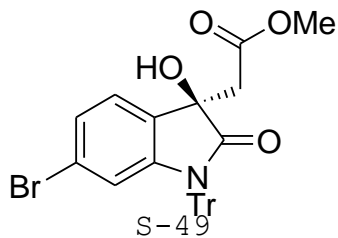

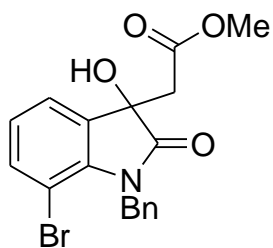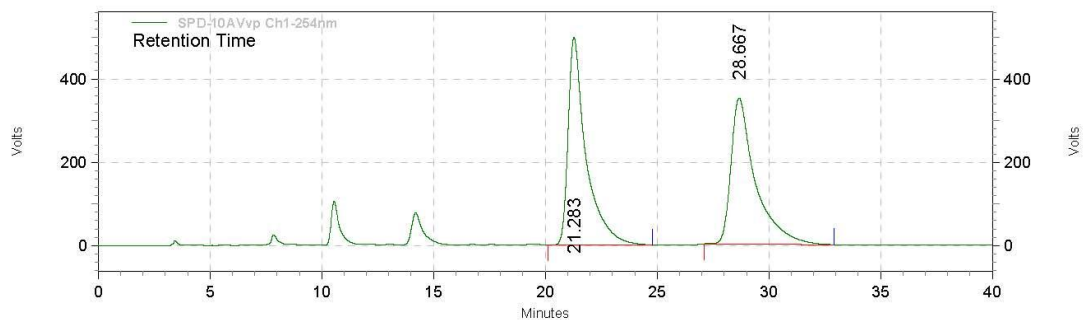

**SPD-10AVvp  
Ch1-254nm**

**Results**

| Retention Time | Area     | Area % | Height | Height % |
|----------------|----------|--------|--------|----------|
| 21.283         | 27696650 | 51.06  | 498155 | 58.68    |
| 28.667         | 26548120 | 48.94  | 350722 | 41.32    |

| Totals | Area     | Area % | Height | Height % |
|--------|----------|--------|--------|----------|
|        | 54244770 | 100.00 | 848877 | 100.00   |

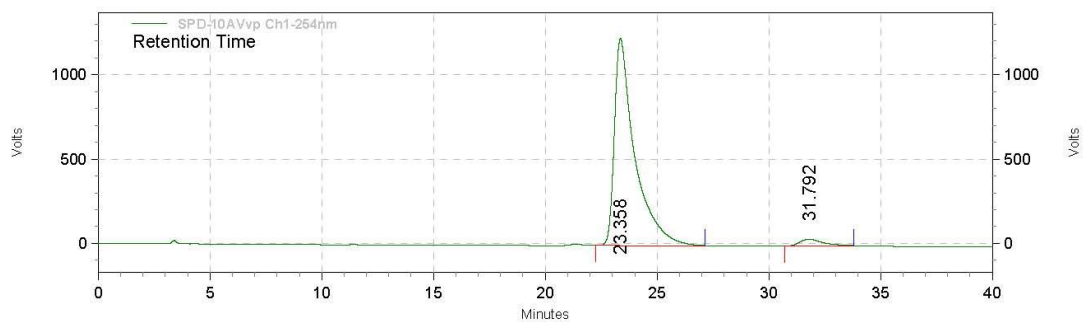

**SPD-10AVvp  
Ch1-254nm**

**Results**

| Retention Time | Area     | Area % | Height  | Height % |
|----------------|----------|--------|---------|----------|
| 23.358         | 77574547 | 96.43  | 1228466 | 96.77    |
| 31.792         | 2871566  | 3.57   | 40986   | 3.23     |

| Totals | Area     | Area % | Height  | Height % |
|--------|----------|--------|---------|----------|
|        | 80446113 | 100.00 | 1269452 | 100.00   |

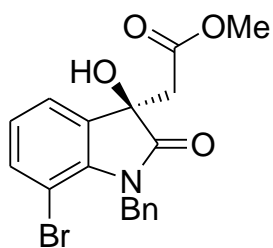

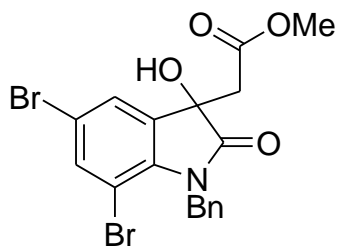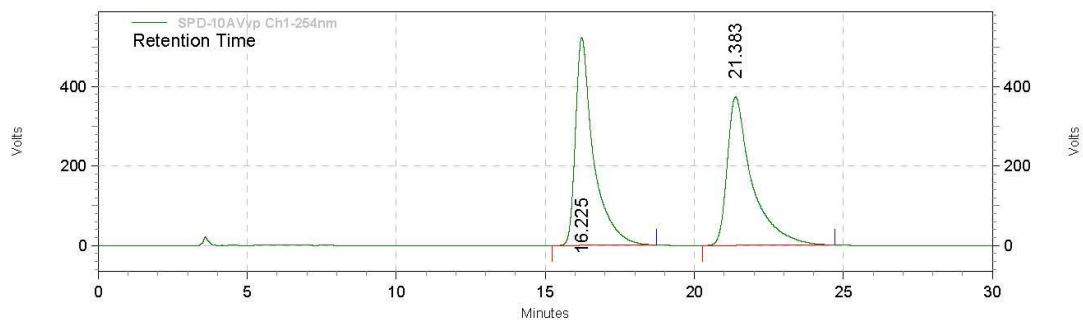

**SPD-10AVvp  
Ch1-254nm**

**Results**

| Retention Time | Area     | Area % | Height | Height % |
|----------------|----------|--------|--------|----------|
| 16.225         | 22044345 | 50.41  | 523551 | 58.34    |
| 21.383         | 21688563 | 49.59  | 373895 | 41.66    |

|        |          |        |        |        |
|--------|----------|--------|--------|--------|
| Totals | 43732908 | 100.00 | 897446 | 100.00 |
|--------|----------|--------|--------|--------|

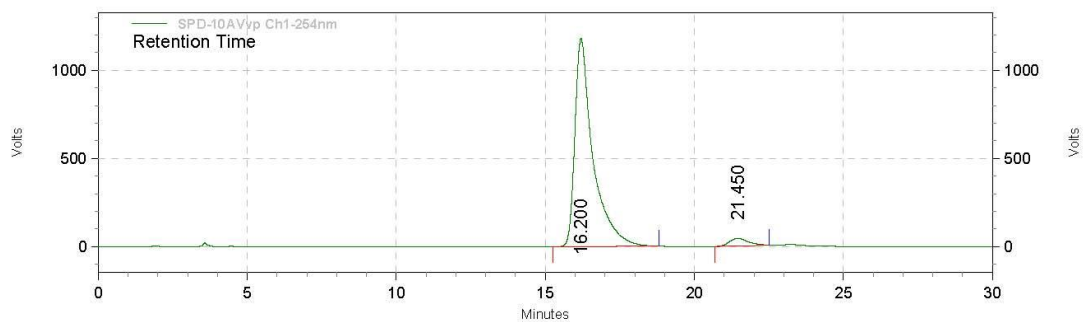

**SPD-10AVvp  
Ch1-254nm**

**Results**

| Retention Time | Area     | Area % | Height  | Height % |
|----------------|----------|--------|---------|----------|
| 16.200         | 49696575 | 96.32  | 1180557 | 96.47    |
| 21.450         | 1900619  | 3.68   | 43215   | 3.53     |

|        |          |        |         |        |
|--------|----------|--------|---------|--------|
| Totals | 51597194 | 100.00 | 1223772 | 100.00 |
|--------|----------|--------|---------|--------|

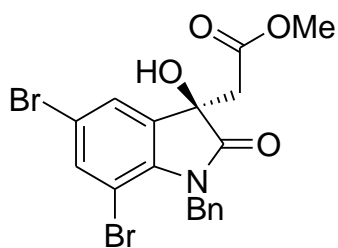

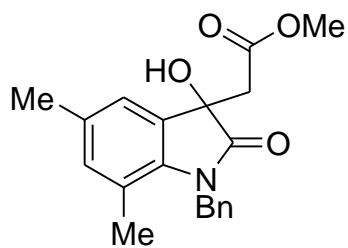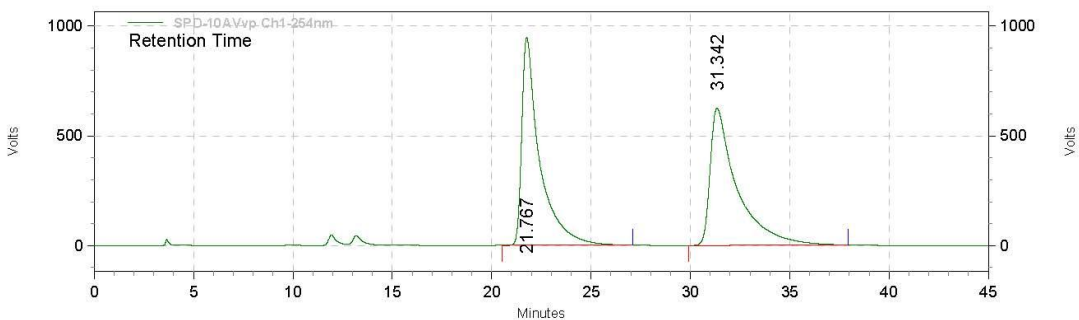

**SPD-10AVvp  
Ch1-254nm**

**Results**

| Retention Time | Area     | Area % | Height | Height % |
|----------------|----------|--------|--------|----------|
| 21.767         | 58689326 | 50.04  | 946878 | 60.29    |
| 31.342         | 58592579 | 49.96  | 623682 | 39.71    |

|        |           |        |         |        |
|--------|-----------|--------|---------|--------|
| Totals | 117281905 | 100.00 | 1570560 | 100.00 |
|--------|-----------|--------|---------|--------|

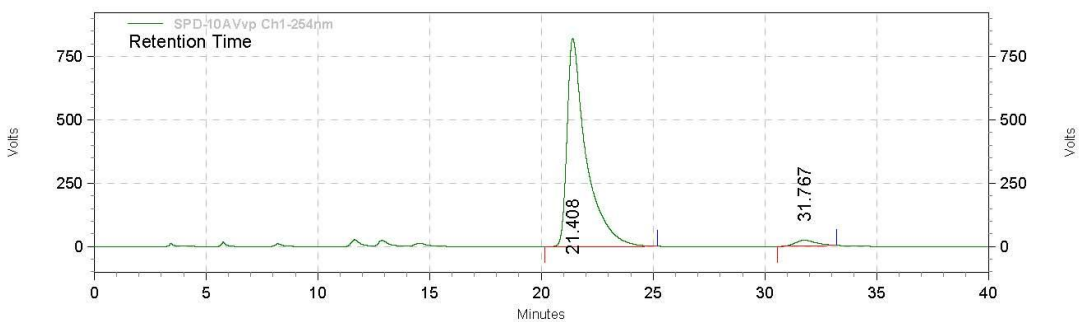

**SPD-10AVvp  
Ch1-254nm**

**Results**

| Retention Time | Area     | Area % | Height | Height % |
|----------------|----------|--------|--------|----------|
| 21.408         | 48645441 | 97.10  | 820902 | 97.34    |
| 31.767         | 1453690  | 2.90   | 22440  | 2.66     |

|        |          |        |        |        |
|--------|----------|--------|--------|--------|
| Totals | 50099131 | 100.00 | 843342 | 100.00 |
|--------|----------|--------|--------|--------|

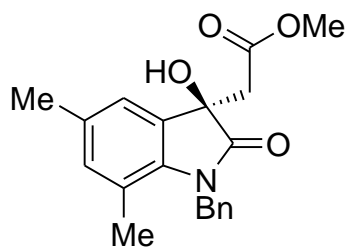

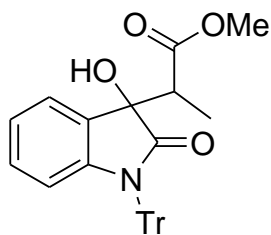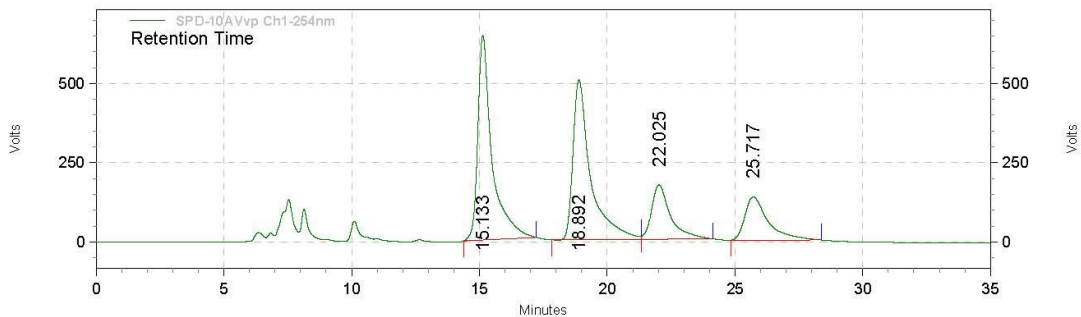

**SPD-10AVvp  
Ch1-254nm  
Results**

| Retention Time | Area     | Area % | Height | Height % |
|----------------|----------|--------|--------|----------|
| 15.133         | 24909407 | 37.40  | 645488 | 44.24    |
| 18.892         | 24182057 | 36.31  | 504753 | 34.59    |
| 22.025         | 8866769  | 13.31  | 171928 | 11.78    |
| 25.717         | 8647666  | 12.98  | 136928 | 9.38     |

|        |          |        |         |        |
|--------|----------|--------|---------|--------|
| Totals | 66605899 | 100.00 | 1459097 | 100.00 |
|--------|----------|--------|---------|--------|

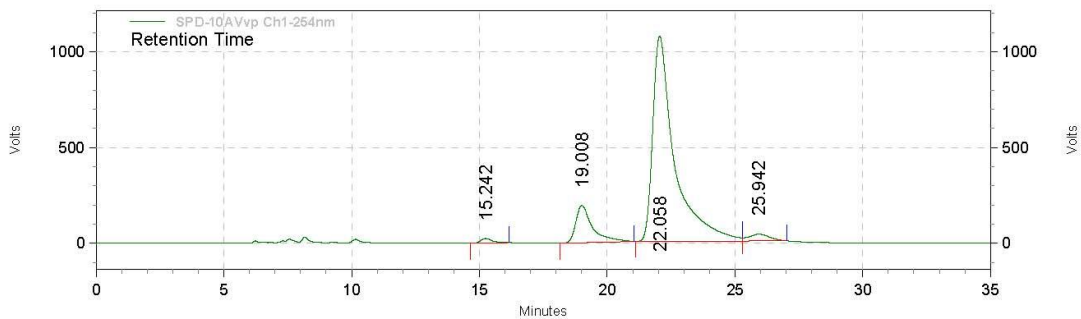

**SPD-10AVvp  
Ch1-254nm  
Results**

| Retention Time | Area     | Area % | Height  | Height % |
|----------------|----------|--------|---------|----------|
| 15.242         | 719788   | 0.96   | 23126   | 1.75     |
| 19.008         | 8804862  | 11.74  | 194452  | 14.69    |
| 22.058         | 63437002 | 84.61  | 1070816 | 80.89    |
| 25.942         | 2012941  | 2.68   | 35473   | 2.68     |

|        |          |        |         |        |
|--------|----------|--------|---------|--------|
| Totals | 74974593 | 100.00 | 1323867 | 100.00 |
|--------|----------|--------|---------|--------|

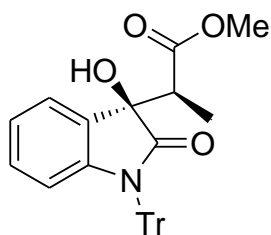

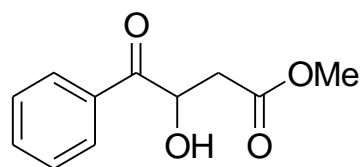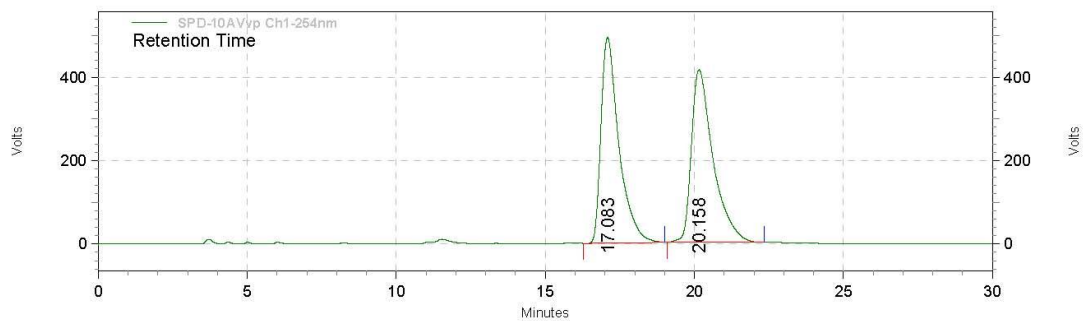

**SPD-10AVvp  
Ch1-254nm  
Results**

| Retention Time | Area     | Area % | Height | Height % |
|----------------|----------|--------|--------|----------|
| 17.083         | 20548192 | 49.46  | 493422 | 54.36    |
| 20.158         | 20993883 | 50.54  | 414201 | 45.64    |
| Totals         | 41542075 | 100.00 | 907623 | 100.00   |

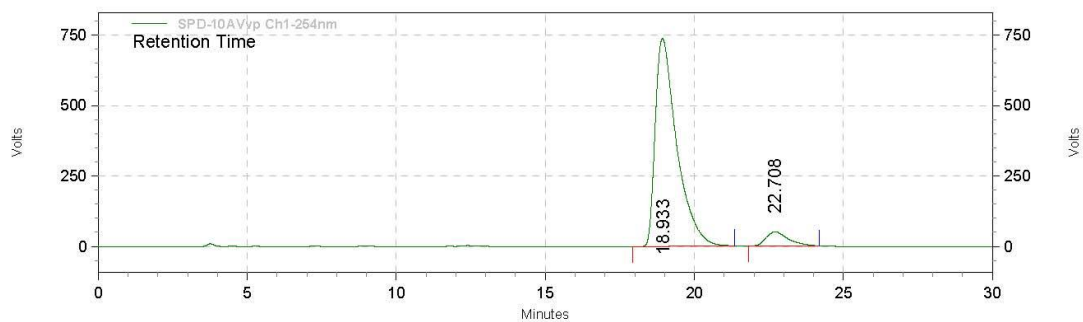

**SPD-10AVvp  
Ch1-254nm  
Results**

| Retention Time | Area     | Area % | Height | Height % |
|----------------|----------|--------|--------|----------|
| 18.933         | 36905620 | 93.45  | 737755 | 93.64    |
| 22.708         | 2588255  | 6.55   | 50067  | 6.36     |
| Totals         | 39493875 | 100.00 | 787822 | 100.00   |

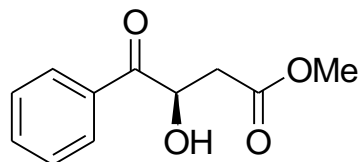

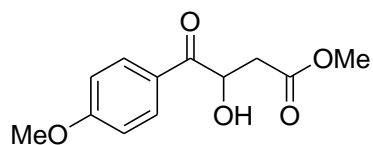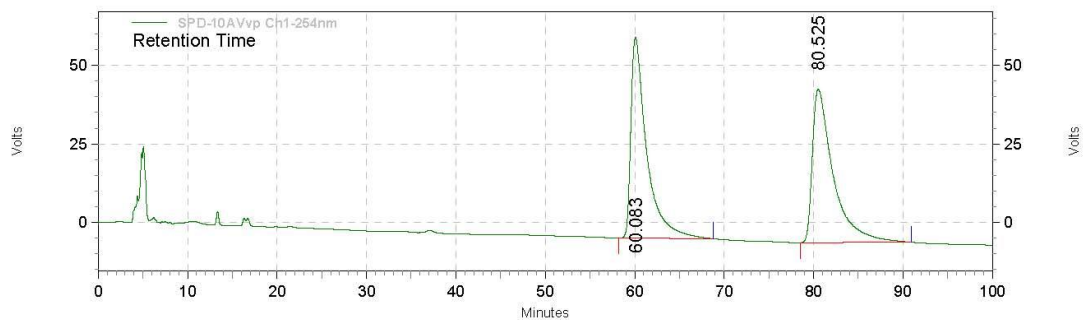

**SPD-10AVvp**

**Ch1-254nm**

**Results**

| Retention Time | Area    | Area % | Height | Height % |
|----------------|---------|--------|--------|----------|
| 60.083         | 7835175 | 49.69  | 63867  | 56.66    |
| 80.525         | 7934106 | 50.31  | 48855  | 43.34    |

|        |          |        |        |        |
|--------|----------|--------|--------|--------|
| Totals | 15769281 | 100.00 | 112722 | 100.00 |
|--------|----------|--------|--------|--------|

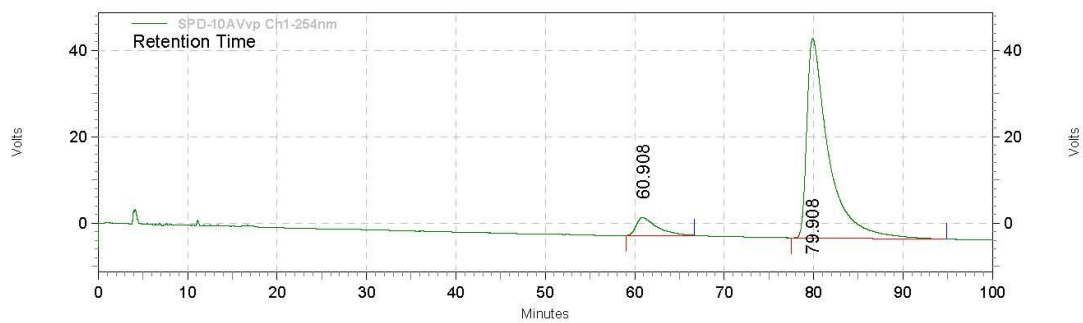

**SPD-10AVvp**

**Ch1-254nm**

**Results**

| Retention Time | Area    | Area % | Height | Height % |
|----------------|---------|--------|--------|----------|
| 60.908         | 664673  | 7.85   | 4123   | 8.18     |
| 79.908         | 7805207 | 92.15  | 46268  | 91.82    |

|        |         |        |       |        |
|--------|---------|--------|-------|--------|
| Totals | 8469880 | 100.00 | 50391 | 100.00 |
|--------|---------|--------|-------|--------|

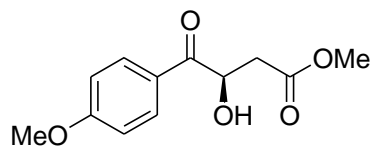



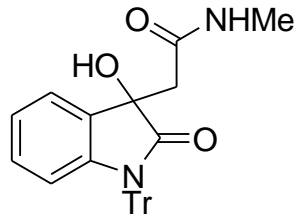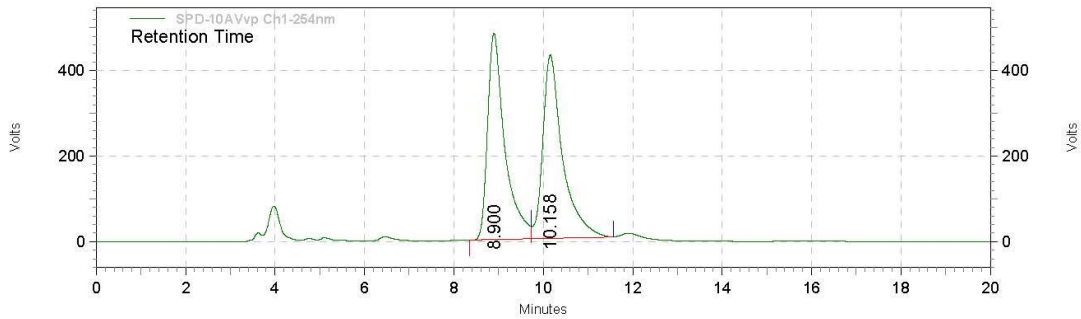

**SPD-10AVvp  
Ch1-254nm  
Results**

| Retention Time | Area     | Area % | Height | Height % |
|----------------|----------|--------|--------|----------|
| 8.900          | 12825943 | 49.43  | 481591 | 52.90    |
| 10.158         | 13123457 | 50.57  | 428776 | 47.10    |
| Totals         | 25949400 | 100.00 | 910367 | 100.00   |

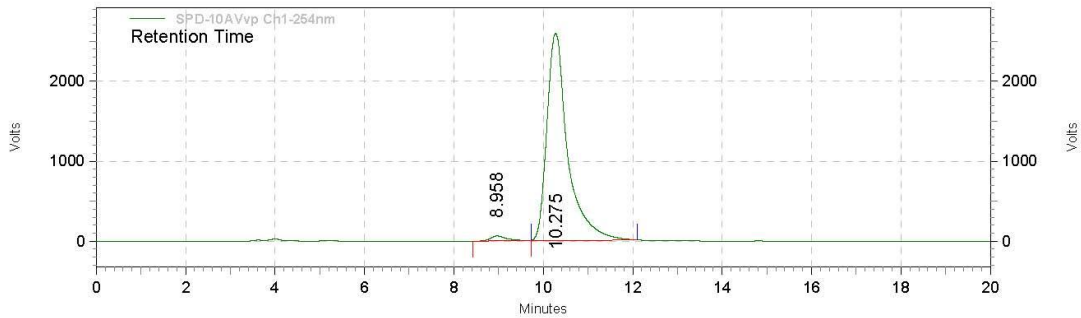

**SPD-10AVvp  
Ch1-254nm  
Results**

| Retention Time | Area     | Area % | Height  | Height % |
|----------------|----------|--------|---------|----------|
| 8.958          | 1547190  | 1.82   | 61681   | 2.33     |
| 10.275         | 83547418 | 98.18  | 2589906 | 97.67    |
| Totals         | 85094608 | 100.00 | 2651587 | 100.00   |

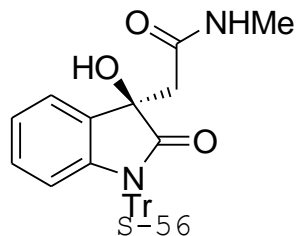

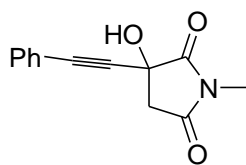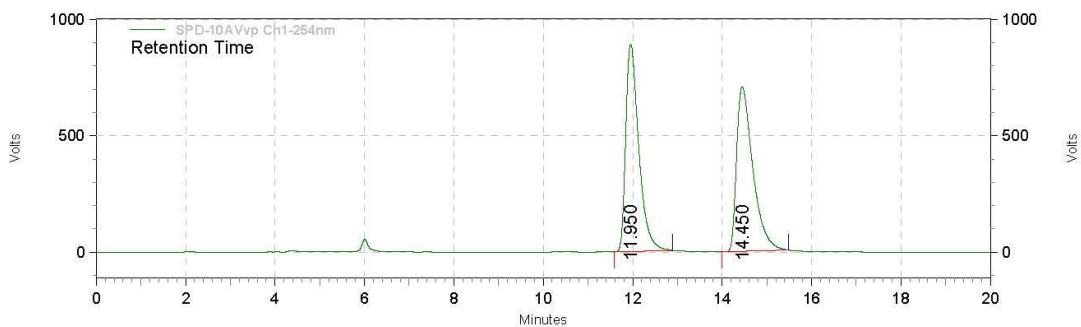

**SPD-10AVvp  
Ch1-254nm**

**Results**

| Retention Time | Area     | Area % | Height | Height % |
|----------------|----------|--------|--------|----------|
| 11.950         | 17980478 | 50.14  | 890060 | 55.77    |
| 14.450         | 17879392 | 49.86  | 705947 | 44.23    |

|        |          |        |         |        |
|--------|----------|--------|---------|--------|
| Totals | 35859870 | 100.00 | 1596007 | 100.00 |
|--------|----------|--------|---------|--------|

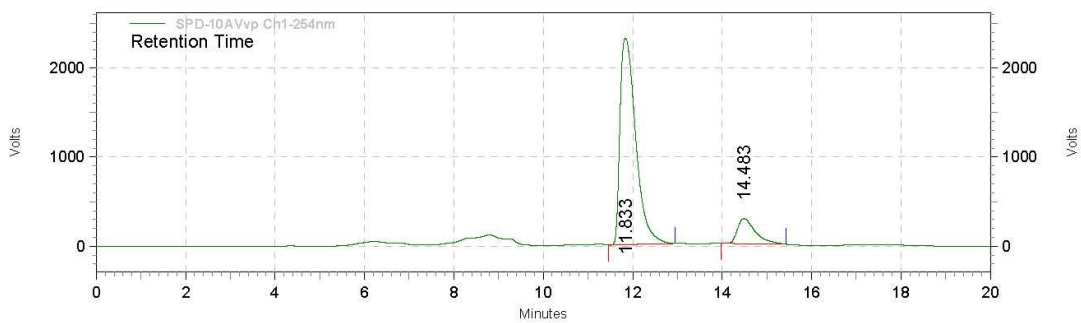

**SPD-10AVvp  
Ch1-254nm**

**Results**

| Retention Time | Area     | Area % | Height  | Height % |
|----------------|----------|--------|---------|----------|
| 11.833         | 56403955 | 87.79  | 2313695 | 89.12    |
| 14.483         | 7845276  | 12.21  | 282320  | 10.88    |

|        |          |        |         |        |
|--------|----------|--------|---------|--------|
| Totals | 64249231 | 100.00 | 2596015 | 100.00 |
|--------|----------|--------|---------|--------|

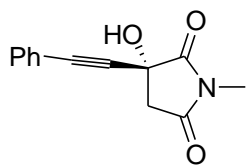

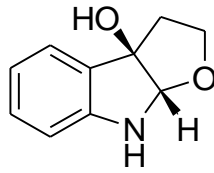

Racemic

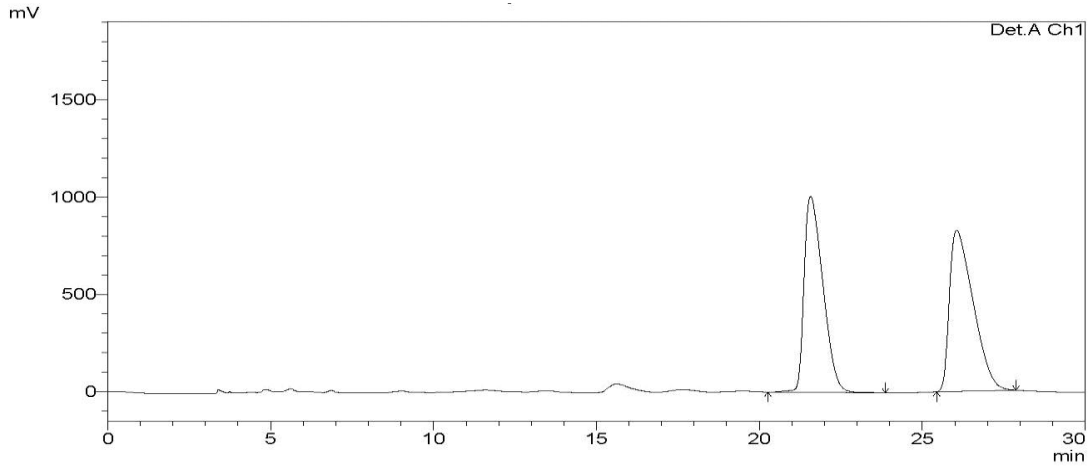

PeakTable

| Peak# | Ret. Time | Area     | Height  | Area %  | Height % |
|-------|-----------|----------|---------|---------|----------|
| 1     | 21.570    | 40305219 | 1007243 | 49.112  | 54.899   |
| 2     | 26.053    | 41762628 | 827470  | 50.888  | 45.101   |
| Total |           | 82067847 | 1834713 | 100.000 | 100.000  |

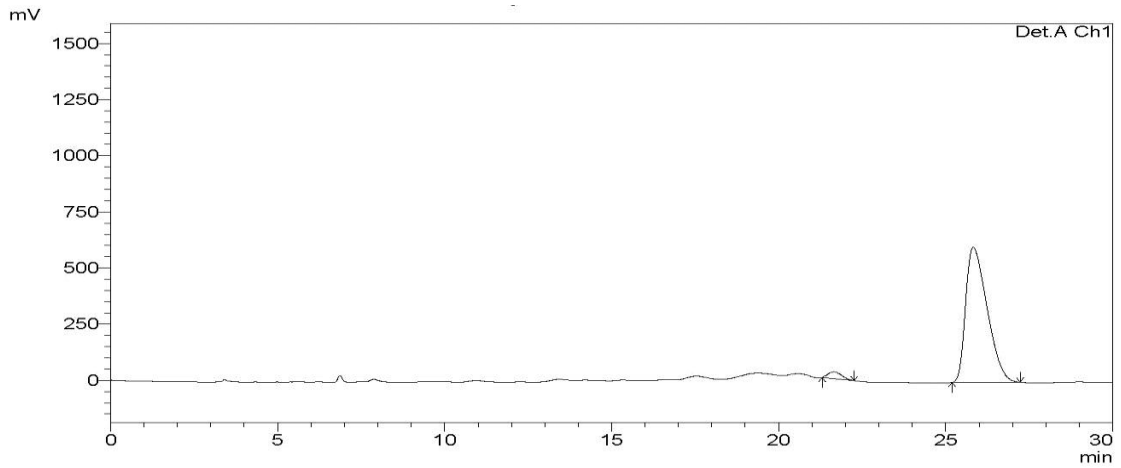

PeakTable

| Peak# | Ret. Time | Area     | Height | Area %  | Height % |
|-------|-----------|----------|--------|---------|----------|
| 1     | 21.645    | 844432   | 29931  | 3.056   | 4.743    |
| 2     | 25.824    | 26785377 | 601146 | 96.944  | 95.257   |
| Total |           | 27629809 | 631077 | 100.000 | 100.000  |

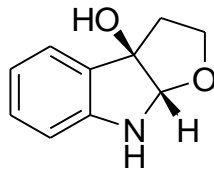

S-58
